# Supplementary material
Source: PubMed Central journal article supplement (PMC3650898)

**Perfluorinated TADDOL Phosphoramidite as an L,Z-Ligand on Rh(I) and Co(-1):  
Evidence for Bidentate Coordination via Metal-C<sub>6</sub>F<sub>5</sub> Interaction**

Derek M. Dalton, Anthony K. Rappé and Tomislav Rovis\*

Department of Chemistry, Colorado State University, Ft. Collins, CO 80523

[rovis@lamar.colostate.edu](mailto:rovis@lamar.colostate.edu)

*Supporting Information*

|                                                                                                  |    |
|--------------------------------------------------------------------------------------------------|----|
| 1. General Methods                                                                               | 2  |
| 2. General Procedure for Ligand Synthesis                                                        | 4  |
| 3. Synthesis of Rh(cod)Cl•Phosphoramidite Complexes                                              | 9  |
| 4. General Procedure for Rhodium Catalyzed [2+2+2] Cycloadditions                                | 11 |
| 5. <sup>1</sup> H-NMR, <sup>13</sup> C-NMR, <sup>19</sup> F-NMR, and <sup>31</sup> P-NMR Spectra | 13 |
| 5. X-ray Crystallography Data                                                                    | 32 |
| 6. Synthesis and X-ray of Co(CO) <sub>3</sub> n-BuN <sub>4</sub> •CKPhos                         | 70 |
| 7. DFT Calculations                                                                              | 84 |
| 8. Structure-Function Relationships of Phosphoramidites and Product Selectivity                  | 98 |

## 1. General Methods

Toluene, tetrahydrofuran, ether, and dichloromethane were degassed with argon and passed through one column of neutral alumina and one column of Q5 reactant. Triethylamine (peptide synthesis grade) was purchased from Fisher Scientific, dried over calcium hydride and freshly distilled prior to use. Flash column chromatography was carried out on silica gel (60 Å, 230 - 400 mesh, obtained from Silicycle Inc.) and was performed with reagent grade solvents. Analytical thin-layer chromatography (TLC) was performed on Silicycle glass-backed silica gel plates (60 Å, 0.25 mm, purchased from Silicycle Inc.) and visualized with a UV lamp (254 nm), and potassium permanganate or ceric ammonium molybdate.

Infrared spectra (IR) were obtained on a Nicolet Avatar 320 FT-IR spectrometer and Bruker Tensor 27 FT-IR spectrometer. <sup>1</sup>H NMR and <sup>13</sup>C NMR were obtained on Varian Unity 300 and Unity 400 spectrometers. Chemical shifts are expressed in parts per million values ( $\delta$ , ppm). Proton chemical shifts in CDCl<sub>3</sub> were referenced to 7.26 ppm (CHCl<sub>3</sub>). Carbon chemical shifts were referenced to 77.2 ppm (CDCl<sub>3</sub>). Peak multiplicities are designated by the following abbreviations: s, singlet; d, doublet; t, triplet; q, quartet; m, multiplet; dd, doublet of doublets; dt, doublet of triplets; b, broad; *J*, coupling constant in Hz. Low resolution mass spectra (MS) and high resolution mass spectra (HRMS) were recorded on a Fisons VG Autospec spectrometer. HPLC spectra were obtained on an Agilent 1100 series system. Optical rotation was obtained with an Autopol-III automatic polarimeter. Melting points were obtained on a Fisher-Johns melting point apparatus and are uncorrected. References following the compound names indicate literature articles where the compound has been previously been reported.

Unless indicated, commercially available starting materials were purchased from Aldrich Chemicals and used without further purification.  $[\text{Rh}(\text{ethylene})_2\text{Cl}]_2$  and cobalt carbonyl were purchased from Strem Chemicals or Alfa Aesar and used without further purification.

## 2. General Procedure for Ligand Synthesis

Taddol diols were prepared from diethyl-tartrate according to literature procedures.<sup>1</sup>

To a flame-dried round bottom flask equipped with a magnetic stirbar under an Ar atmosphere was added the desired amine (pyrrolidine: 0.20 ml, 2.42 mmol, 1 equiv.) and tetrahydrofuran (THF, anhydrous, 40 ml). The reaction vessel is cooled to 0 °C and *n*-butyl lithium (1.6 ml, 1.6 M in hexanes) is added dropwise via syringe. The solution is stirred for 30 minutes at 0 °C before phosphorous trichloride (0.22 ml, 2.52 mmol, 1.0 equiv.) is added in one portion via syringe. After stirring an additional 15 minutes, a solution of Taddol diol (2.0 g, 2.42 mmol, 1 equiv.), and triethylamine (1.0 ml, 7.19 mmol, 3.0 equiv.) in THF (10 ml) is added via syringe. The flask is allowed to warm to room temperature, stirred for 3 hours, and solvent is removed by rotary evaporation. Toluene (50 ml) is then added to the resultant residue and the slurry is filtered through alumina and washed with toluene (2x). Solvent is removed from the combined filtrates by rotary evaporation. If necessary, the product can be further purified by column chromatography (19:1 Hexanes/EtOAc) to yield a white foam powder (1.1g, 51% yield, CKPhos).

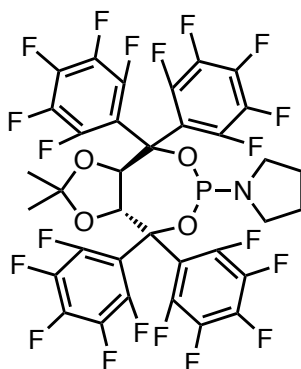

<sup>1</sup> For the synthesis of the Taddol diol precursors see: Seebach, D.; Beck, A.K.; Keckel, A. *Angew. Chem. Int. Ed.* **2001**, *40*, 92. Burks, H.E.; Shubin, L.; Morken, J.P. *J. Am. Chem. Soc.* **2007**, *129*, 28, 8766.

**1-((3aR,8aR)-2,2-dimethyl-4,4,8,8-tetrakis(perfluorophenyl)tetrahydro-[1,3]dioxolo[4,5-e][1,3,2]dioxaphosphepin-6-yl)pyrrolidine (CKphos).**

General procedure yielded a white solid (51 %).  $[\alpha]^{20}_D = -109^\circ$ ,  $c = 0.01$  g/ml  $\text{CHCl}_3$ .  $R_f = 0.46$  (19:1, Hex/EtOAc).  $^1\text{H-NMR}$  (400 MHz;  $\text{CDCl}_3$ ):  $\delta$  5.59 (1H, d,  $J = 7.8$  Hz), 5.31 (1H, d,  $J = 8.2$  Hz), 3.12 (2H, dd,  $J = 9.7, 5.7$  Hz), 2.79 (2H, dd,  $J = 9.4, 5.4$  Hz), 1.70-1.59 (4H, m), 1.08 (3H, s), 0.72 (3H, s).  $^{13}\text{C-NMR}$  (100 MHz;  $\text{CDCl}_3$ ):  $\delta$  146.3, 143.8, 142.3, 139.7, 139.0, 136.5, 117.7, 113.3, 80.6, 80.5, 80.4, 45.6, 45.4, 45.1, 26.3, 26.2, 26.0, 25.9, 25.8.  $^{31}\text{P-NMR}$  (75 MHz;  $\text{CDCl}_3$ ):  $\delta$  138.6.  $^{19}\text{F-NMR}$  (376 MHz;  $\text{CDCl}_3$ ):  $\delta$  -131.2 (1F, d), -133.7 (1F, m), -135.8 (1F, d), -137.6 (2F, m), -139.2 (1F, d), -140.1 (1F, d), -151.8 (1F, t), -152.1 (1F, t), -152.3 (1F, t), -152.9 (1F, t), -160.4 (1F, m), -160.7 (1F, m), -161.1 to -161.4 (5F, m), -161.8 (1F, dt), -162.1 (1F, m). IR (Thin Film)  $\nu$  2988, 2876, 1651, 1525, 1487, 1409, 1384, 1374, 1346, 1308, 1240, 1131, 985, 862, 807, 743, 703. HRMS (ESI)  $m/z$   $[\text{C}_{35}\text{H}_{17}\text{F}_{20}\text{NO}_4\text{P}]^+$  calculated 925.0498, found 925.0508.

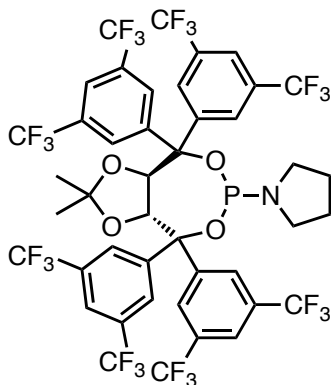

**1-((3aR,8aR)-4,4,8,8-tetrakis(3,5-bistrifluoromethylphenyl)-2,2-dimethyltetrahydro-[1,3]dioxolo[4,5-e][1,3,2]dioxaphosphepin-6-yl)pyrrolidine (T8)**

General procedure yielded a white solid (72 %).  $[\alpha]^{20}_D = -65^\circ$ ,  $c = 0.01$  g/ml  $\text{CHCl}_3$ .  $R_f = 0.5$  (19:1, Hex/EtOAc).  $^1\text{H-NMR}$  (400 MHz;  $\text{CDCl}_3$ ):  $\delta$  8.26 (2H, s), 8.01 (2H, s), 7.84 (8H, q,  $J =$

8.7 Hz), 4.96-4.93 (1H, dd,  $J = 8.7, 3.8$  Hz), 4.30 (dd,  $J = 8.7, 1.1$  Hz), 3.41 (2H, quintet,  $J = 6.9$  Hz), 3.30 (2H, quintet,  $J = 7.0$  Hz), 1.97-1.89 (4H, m) 1.49 (3H, s) 0.310 (3H, s).  $^{13}\text{C}$ -NMR (100 MHz;  $\text{CDCl}_3$ ):  $\delta$  147.3, 146.4, 142.6, 141.8, 131.8 (m), 128.5 (d), 126.9, 126.6, 124.3, 122.7 (m), 122.3 (m), 121.6, 118.9, 82.8, 81.8, 81.5, 80.0, 79.9, 79.3, 45.0, 26.9, 26.0, 25.1.  $^{19}\text{F}$ -NMR (376 MHz;  $\text{CDCl}_3$ ):  $\delta$  63.1 (q).  $^{31}\text{P}$ -NMR (75 MHz;  $\text{CDCl}_3$ )  $\delta$  139.4. IR (Thin Film)  $\nu$  3103, 2969, 2879, 1625, 1467, 1374, 1338, 1279, 1176, 1133, 1047, 1014, 904, 879, 848, 779, 709, 683. HRMS (ESI)  $m/z$  [ $\text{C}_{43}\text{H}_{29}\text{F}_{24}\text{NO}_4\text{P}$ ] $^+$  calculated 1109.1373, found 1109.1364.

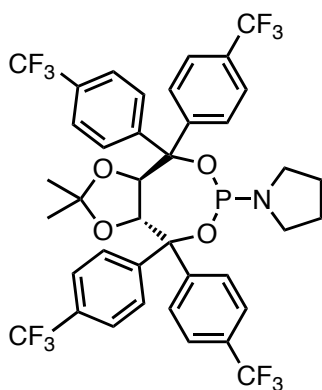

**1-((3aR,8aR)-2,2-dimethyl-4,4,8,8-tetrakis(4-(trifluoromethyl)phenyl)tetrahydro[1,3]dioxolo[4,5-e][1,3,2]dioxaphosphepin-6-yl)pyrrolidine (T7)**

General procedure yielded a white solid (56%).  $[\alpha]_{\text{D}}^{20} = -87^\circ$ ,  $c = 0.01$  g/ml  $\text{CHCl}_3$ .  $R_f = 0.34$  (19:1, Hex/EtOAc).  $^1\text{H}$ -NMR (400 MHz;  $\text{CDCl}_3$ ):  $\delta$  7.87 (2H, d,  $J = 8.3$  Hz), 7.70 (2H, d,  $J = 8.4$  Hz), 7.63-7.50 (12H, m), 5.12 (1H, dd,  $J = 8.6, 3.4$  Hz), 4.64 (1H, d,  $J = 8.6$  Hz), 3.40 (2H, quintet, 7.2 Hz), 3.26 (2H, quintet, 7.3 Hz), 1.87 (4H, m), 1.34 (3H, s), 0.32 (3H, s).  $^{13}\text{C}$ -NMR (100 MHz;  $\text{CDCl}_3$ ):  $\delta$  147.8, 147.1, 143.3, 142.7, 128.4, 128.2, 128.1, 128.0, 127.9, 127.8, 127.7, 127.6, 127.3, 127.0, 126.9, 126.7, 125.8, 125.4, 125.3, 123.5, 123.5, 123.4, 123.3, 123.0, 123.0, 122.9, 122.9, 122.8, 122.3, 122.3, 120.7, 120.6, 110.4, 80.3, 80.3, 80.1, 79.8, 79.0, 18.7, 78.6,

43.1, 43.0, 25.5, 24.1, 24.0, 23.3.  $^{19}\text{F}$ -NMR (376 MHz;  $\text{CDCl}_3$ ):  $\delta$  -62.7 (q).  $^{31}\text{P}$ -NMR (75 MHz;  $\text{CDCl}_3$ ):  $\delta$  139.0. IR (Thin Film)  $\nu$  2991, 2939, 2876, 1929, 1619, 1458, 1375, 1166, 1126, 1070, 1009, 909, 881, 851, 780, 733. HRMS (ESI)  $m/z$  [ $\text{C}_{39}\text{H}_{33}\text{F}_{12}\text{NO}_4\text{P}$ ] $^+$  calculated 837.1877, found 837.1877.

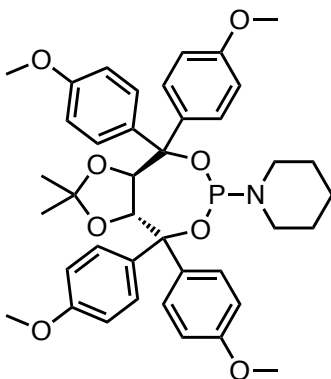

**1-((3aR,8aR)-4,4,8,8-tetrakis(4-methoxyphenyl)-2,2-dimethyltetrahydro-[1,3]dioxolo[4,5-e][1,3,2]dioxaphosphin-6-yl)piperidine (T4)**

Synthesized according to the general ligand procedure with the following modifications to yield a white solid (35 %). After removal of THF, the product was further purified by column chromatography on neutral alumina (19:1 to 9:1 Hex/EtOAc).  $[\alpha]^{20}_{\text{D}} = -94.5^\circ$ ,  $c = 0.01$  g/ml  $\text{CHCl}_3$ . Rf = 0.10 (9:1, Hex/EtOAc).  $^1\text{H}$ -NMR (400 MHz;  $\text{CDCl}_3$ ):  $\delta$  7.69 (2H, d,  $J = 8.8$  Hz), 7.51 (2H, d,  $J = 8.8$  Hz), 7.34 (4H, dd,  $J = 18.0, 8.8$  Hz), 6.81 (8H, td,  $J = 9.6, 5.9$  Hz), 5.06 (1H, dd,  $J = 8.5, 3.3$  Hz), 4.70 (1H, d,  $J = 8.5$  Hz), 3.78 (12H, m), 3.27 (2H, m), 3.16 (2H, m), 1.59 (3H, s), 1.33 (3H, s).  $^{13}\text{C}$ -NMR (100 MHz;  $\text{CDCl}_3$ ):  $\delta$  158.6, 158.5, 158.4, 158.3, 139.7, 139.3, 134.7, 134.4, 130.1, 130.0, 129.9, 128.2, 113.3, 112.9, 112.7, 112.4, 111.3, 98.3, 82.9, 82.8, 82.6, 82.4, 55.1, 45.0, 44.9, 27.6, 27.0, 25.5, 25.2.  $^{31}\text{P}$ -NMR (75 MHz;  $\text{CDCl}_3$ ):  $\delta$  138.6. IR (Thin

Film)  $\nu$  2994, 2934, 2836, 1609, 1582, 1509, 1462, 1372, 1301, 1251, 1214, 1176, 1092, 1035, 949, 880, 787, 739, 712. MS (LR-ES)  $m/z$   $[\text{C}_{40}\text{H}_{46}\text{NO}_8\text{P}]^+$  calculated 700.3, found 700.4.



### 3. Synthesis of Rh(cod)Cl•Phosphoramidite Complexes

To an oven-dried 3 ml vial flushed with argon was added rhodium(cod)chloride dimer (1 equiv.) and phosphoramidite ligand (2 equiv.). Solids were dissolved in CDCl<sub>3</sub> and stirred until homogenous under argon. Spectra were collected promptly after the solution was made. Complex in solution slowly decomposed over time (hours) when exposed to air.

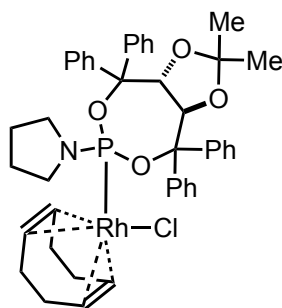

#### Rh(cod)Cl•T4 Complex

General procedure yielded a yellow solution. <sup>1</sup>H-NMR (400 MHz; CDCl<sub>3</sub>): δ 7.96 (2H, d, *J* = 7.3 Hz) 7.51 (2H, t, *J* = 7.6 Hz) 7.42 (3H, m) 7.31 (2H, t, 7.6 Hz) 7.22 (3H, m) 7.13 (6H, m) 7.00 (2H, dt, *J* = 2.4, 5.0 Hz) 5.42 (1H, d, *J* = 8.0 Hz) 5.38 (1H, dd, *J* = 4.0, 7.5 Hz) 5.19 (1H, d, *J* = 8.0 Hz) 5.04 (1H, m) 4.00 (1H, m) 3.46 (1H, t, *J* = 6.9 Hz) 3.36 (2H, bs) 3.03 (2H, t, *J* = 6.7 Hz) 2.27 (1H, m) 2.17 (1H, m) 1.87 (2H, dd, *J* = 5.7, 13.2 Hz) 1.80 (1H, t, *J* = 9.0 Hz) 1.68 (2H, t, *J* = 9.0 Hz) 1.50 (1H, m) 1.33 (2H, m) 1.17 (2H, m) 0.44 (3H, s) 0.38 (3H, s). <sup>13</sup>C-NMR (100 MHz; CDCl<sub>3</sub>): δ 144.6, 143.6, 142.0, 141.7, 129.2, 128.5, 128.0, 127.01, 126.83, 115.0, 109.1, 106.3, 98.4, 86.9, 86.1, 80.7, 78.7, 68.3, 67.6, 48.4, 33.3, 32.4, 28.6, 26.8, 26.4, 25.6. <sup>31</sup>P-NMR (75 MHz; CDCl<sub>3</sub>): δ 144.6, 143.6.

#### Rh(cod)Cl•CKphos Complex

General procedure yielded a yellow solution. <sup>1</sup>H-NMR (400 MHz; CDCl<sub>3</sub>): δ 5.76 (1H, d, *J* = 7.6 Hz) 5.64 (1H, d, *J* = 7.6 Hz) 5.49 (1H, m) 4.79 (1H, m) 4.13 (1H, bs) 3.84 (1H, bs) 3.02 (2H, bs)

2.41 (2H, m) 2.28 (1H, m) 2.18 (1H, dd  $J = 5.7, 15$  Hz) 2.09 (3H, q,  $J = 7.4$  Hz) 1.97 (1H, dt,  $J = 6.1, 13.0$  Hz) 1.86 (1H, dt,  $J = 7.0, 14.2$  Hz) 1.68 (1H, q,  $J = 7.8$  Hz) 1.49 (6H, bs) 0.80 (3H, s) 0.73 (3H, s).  $^{13}\text{C}$ -NMR (100 MHz;  $\text{CDCl}_3$ ):  $\delta$  146.1, 143.6, 142.3, 138.9, 136.4, 116.0, 115.2, 113.4, 112.7, 109.7, 85.2, 83.3, 79.1, 78.7, 71.7, 69.2, 49.6, 34.4, 32.0, 30.8, 27.7, 26.4, 26.1.  $^{31}\text{P}$ -NMR (75 MHz;  $\text{CDCl}_3$ ):  $\delta$  116.5 (1P, dd,  $J = 5, 243$  Hz).  $^{19}\text{F}$ -NMR (376 MHz;  $\text{CDCl}_3$ ):  $\delta$   $^{19}\text{F}$ -NMR (376 MHz;  $\text{CDCl}_3$ ):  $\delta$  -124.63 (dd,  $J = 24.9, 4.8$  Hz, 1F), -129.52 (d,  $J = 23.0$  Hz, 1F), -131.90 (d,  $J = 23.0$  Hz, 1F), -134.13 (d,  $J = 22.2$  Hz, 1F), -138.01 (d,  $J = 22.0$  Hz, 1F), -139.33 (d,  $J = 18.1$  Hz, 1F), -140.30--140.34 (m, 1F), -143.66 (d,  $J = 22.8$  Hz, 1F), -151.43--151.63 (m, 3F), -152.39 (t,  $J = 21.7$  Hz, 1F), -157.19 (td,  $J = 23.3, 6.7$  Hz, 1F), -160.44 (td,  $J = 22.2, 5.2$  Hz, 1F), -160.68 (td,  $J = 21.7, 5.2$  Hz, 1F), -160.89 (td,  $J = 21.5, 5.2$  Hz, 1F), -161.71 (dddd,  $J = 40.0, 21.8, 20.3, 6.8$  Hz, 3F), -162.99 (td,  $J = 22.3, 5.2$  Hz, 1F).

#### 4. General Procedure for Rhodium Catalyzed [2+2+2] Cycloadditions

Isocyanates and vinylogous amide indolizinone products not listed below were synthesized according to previously reported literature procedures.<sup>2</sup>

An oven-dried round bottom flask was charged with  $[\text{Rh}(\text{C}_2\text{H}_4)_2\text{Cl}]_2$  (4 mg, 0.01 mmol) and ligand (20 mg, 0.02 mmol) and fitted with an oven-dried reflux condenser in an inert atmosphere (Ar) glove box. Upon removal from the glove box, 2 ml of toluene was added via syringe and the resulting yellow solution was stirred at ambient temperature for 5 min. To this solution, alkyne **1** (0.20 mmol, 1 equiv) and isocyanate **2** (0.26 mmol, 1.3 equiv) in 6 ml of toluene was added via syringe. An additional 2 ml of toluene was used to wash down the residue and added to the reaction mixture. The reaction mixture was heated to 110 °C in an oil bath and kept at reflux for 16 h. The reaction mixture was cooled to 23 °C, concentrated in *vacuo*, and purified by flash column chromatography (19:1 EtOAc:MeOH). Evaporation of solvent afforded the analytically pure products. Absolute stereochemistry was established as previously reported.<sup>3,4</sup>

---

<sup>2</sup> a) Dalton, D. M.; Oberg, K. M.; Yu, R. T.; Lee, E. E.; Perreault, S.; Oinen, M. E.; Pease, M. L.; Malik, G.; Rovis, T. *J. Am. Chem. Soc.* **2009**, *131*, 43, 15717-15728. b) Yu, R. T.; Lee, E. E.; Malik, G.; Rovis, T. *Angew. Chem. Int. Ed.* **2009**, *48*, 2379-2382. c) Lee, E. E.; Rovis, T. *Org. Lett.* **2008**, *10*, 6, 1231-1234.

<sup>3</sup> Yu, R. T.; Rovis, T. *J. Am. Chem. Soc.* **2006**, *128*, 12370-12371

<sup>4</sup> Yu, R. T.; Lee, E. E.; Malik, G.; Rovis, T. *Angew. Chem. Int. Ed.* **2009**, *48*, 2379-2382.

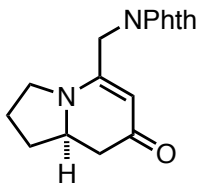

**2-((7-oxo-1,2,3,7,8,8a-hexahydroindolizin-5-yl)methyl)isoindoline-1,3-dione (4f)**

General procedure yielded a brown solid (71%). 98% ee by HPLC (Chiralcel ODH, Hex:iPrOH 70:30, 1 ml/min, RT<sub>major</sub> = 41.6 min, RT<sub>minor</sub> = 26.8 min).  $[\alpha]_D^{20} = 152^\circ$ ,  $c = 0.01$  g/ml CHCl<sub>3</sub>. R<sub>f</sub> = 0.14 (EtOAc). <sup>1</sup>H NMR (400 MHz, CDCl<sub>3</sub>)  $\delta$  7.81 (2H, dd,  $J = 5.4, 3.1$  Hz), 7.69 (2H, dd,  $J = 5.4, 3.0$  Hz), 4.66 (1H, s), 4.41 (2H, q,  $J = 13.6$  Hz), 3.75 (1H, ddt,  $J = 15.5, 10.3, 5.2$  Hz), 3.61 (2H, dq,  $J = 24.9, 8.5$  Hz), 2.34 (1H, dd,  $J = 16.0, 5.0$  Hz), 2.24 (2H m), 2.13 (1H, dt,  $J = 12.7, 6.4$  Hz), 1.90 (1H, m), 1.64 (1H, m). <sup>13</sup>C NMR (100 MHz, CDCl<sub>3</sub>)  $\delta$  191.7, 167.3, 157.3, 134.4, 131.7, 123.7, 98.3, 94.7, 59.5, 46.5, 41.2, 37.9, 32.2, 24.1. IR (Thin Film)  $\nu$  2964, 2875, 2360, 1778, 1716, 1620, 1562, 1500, 1469, 1422, 1394, 1351, 1330, 1300, 1273, 1250, 1198, 1167, 1112, 1086, 989, 952, 859, 756. HRMS (ESI)  $m/z$  [C<sub>17</sub>H<sub>17</sub>N<sub>2</sub>O<sub>3</sub>]<sup>+</sup> calculated 297.1234, found 297.1234.

## 5. $^1\text{H}$ -NMR, $^{13}\text{C}$ -NMR, $^{19}\text{F}$ -NMR, and $^{31}\text{P}$ -NMR Spectra

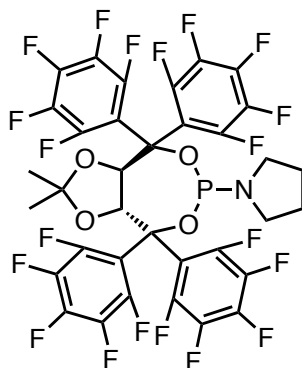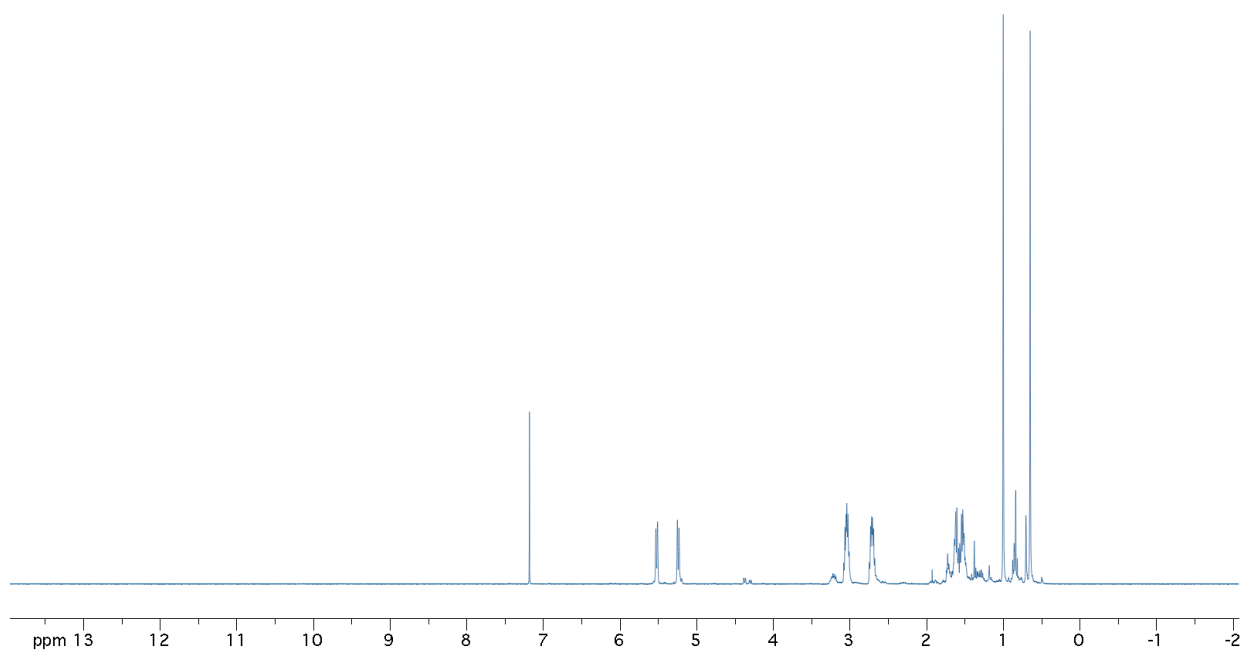

$^1\text{H}$ NMR CKphos

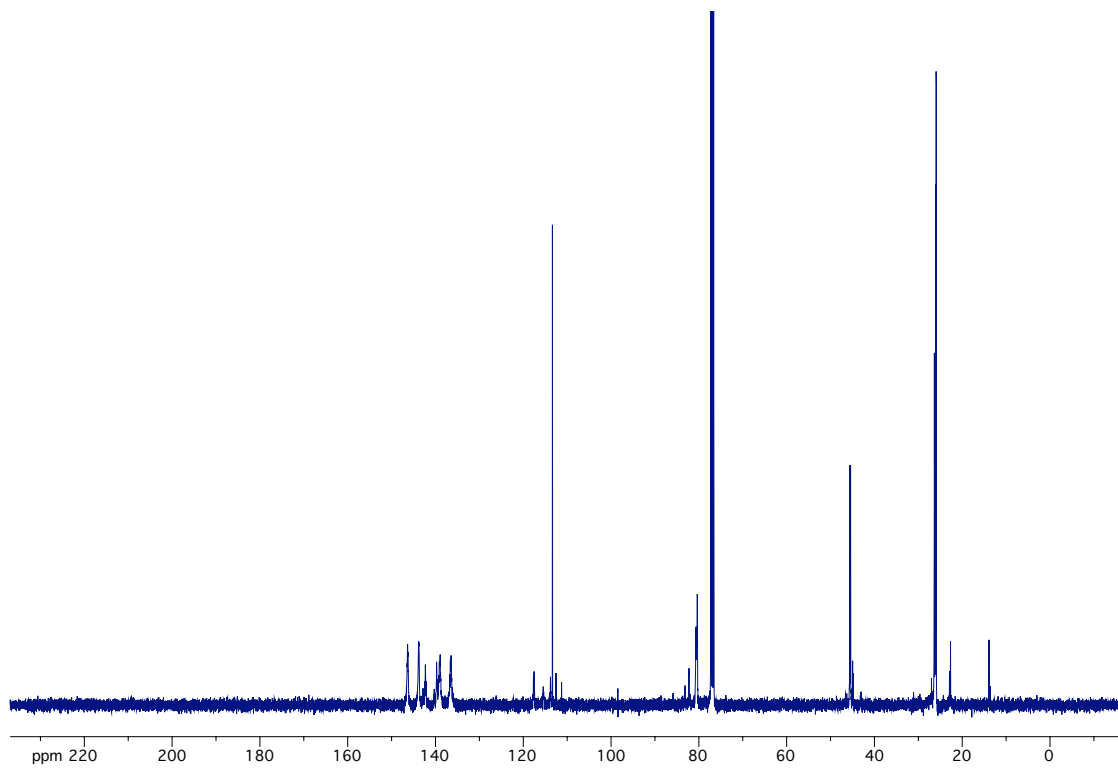

$^{13}\text{C}$ NMR

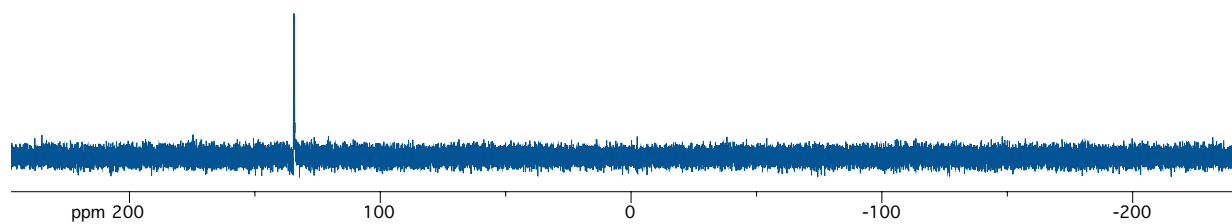

$^{31}\text{P}$ NMR

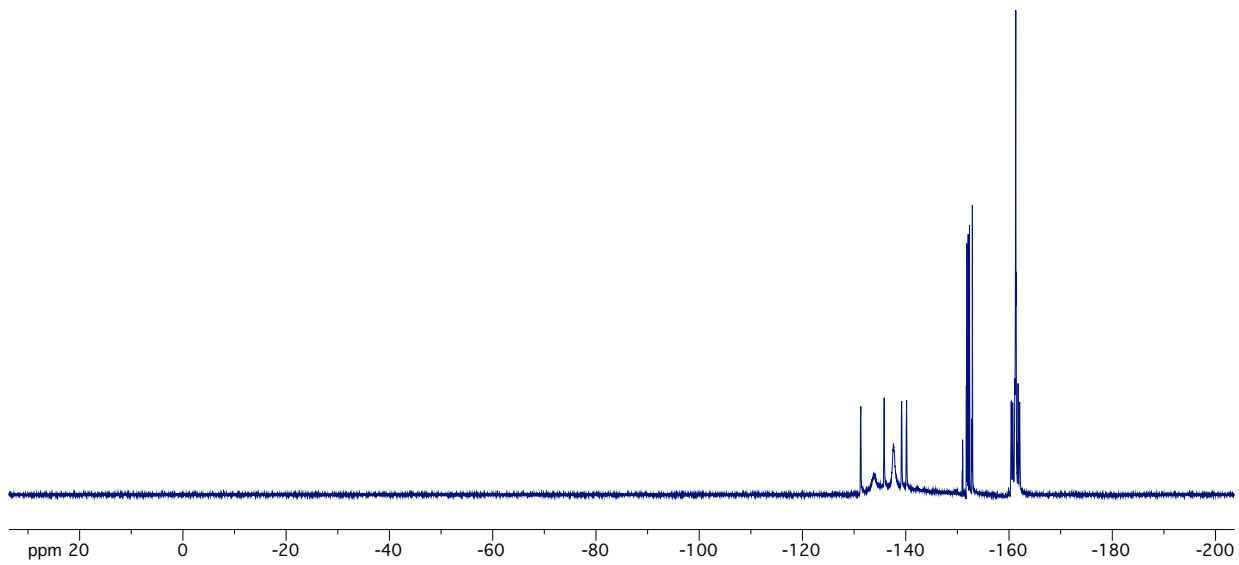

$^{19}\text{F}$ NMR

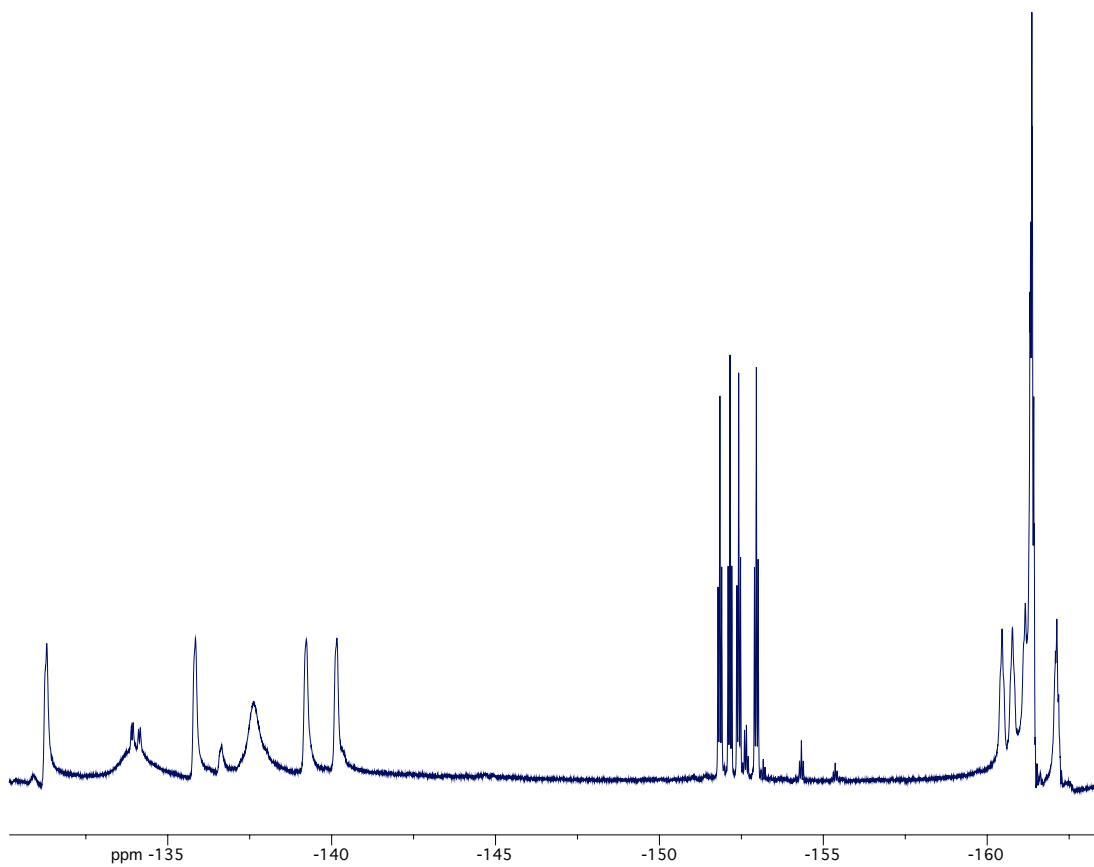

$^{19}\text{F}$ NMR

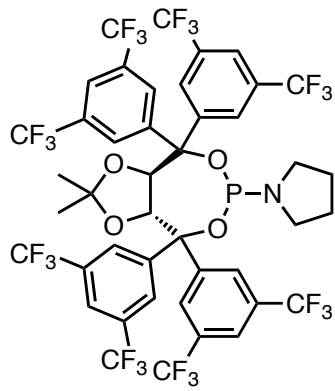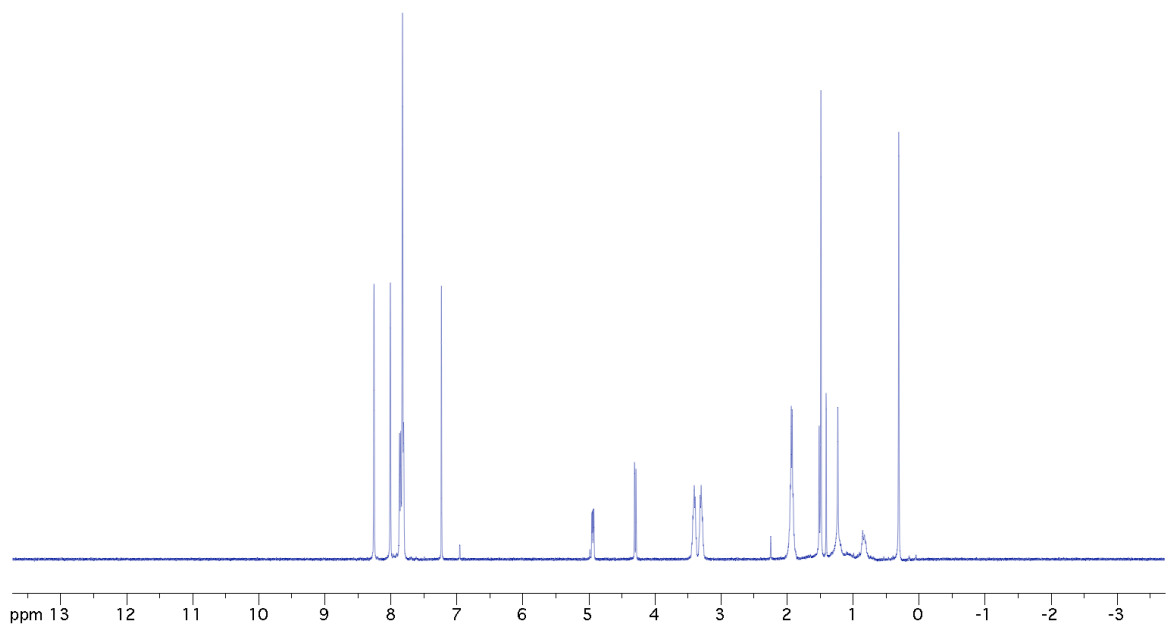

<sup>1</sup>H-NMR



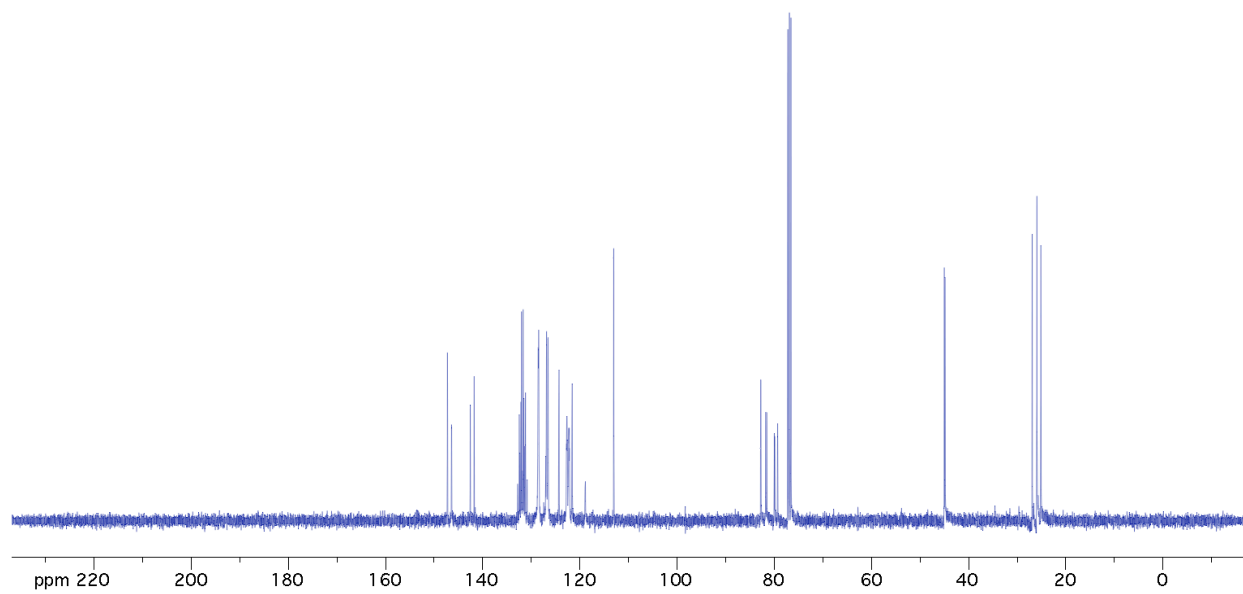

$^{13}\text{C}$ NMR

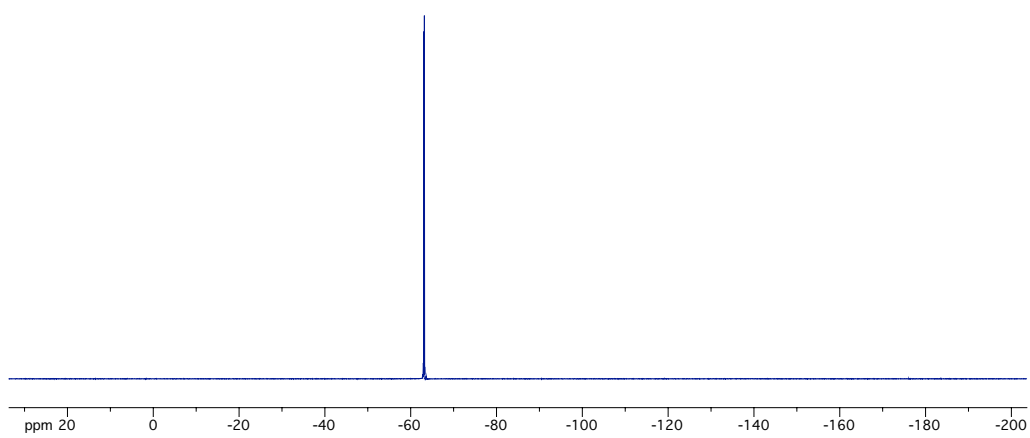

$^{19}\text{F}$ NMR

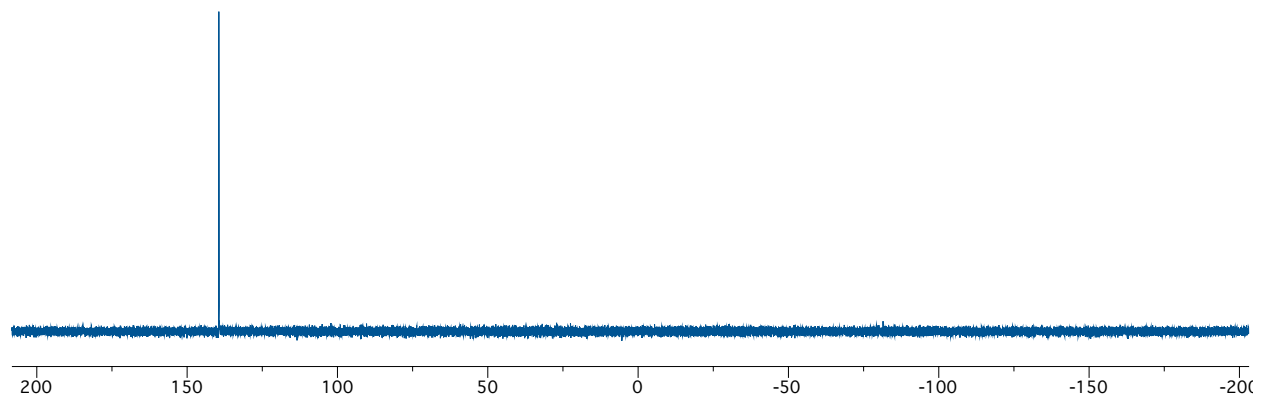

$^{31}\text{P}$ NMR

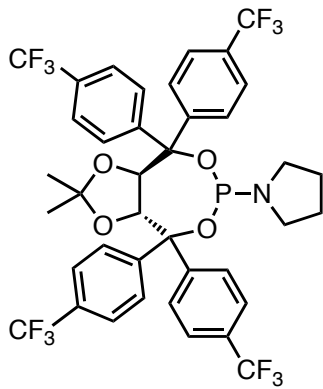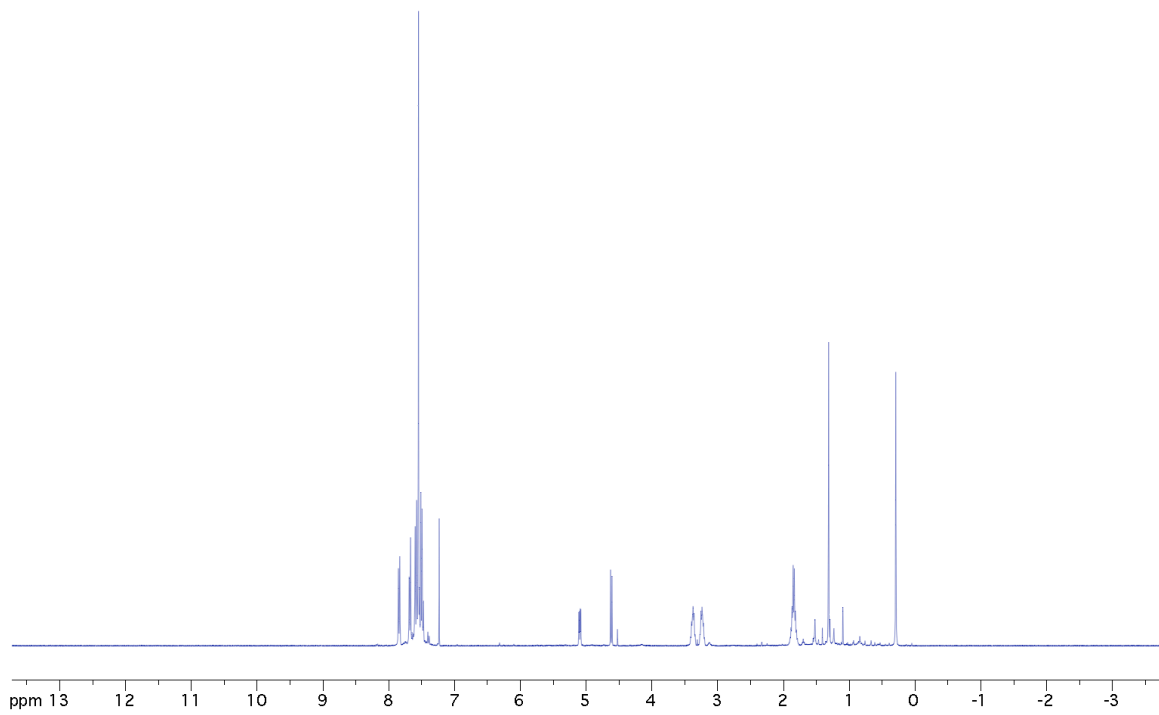

<sup>1</sup>H NMR

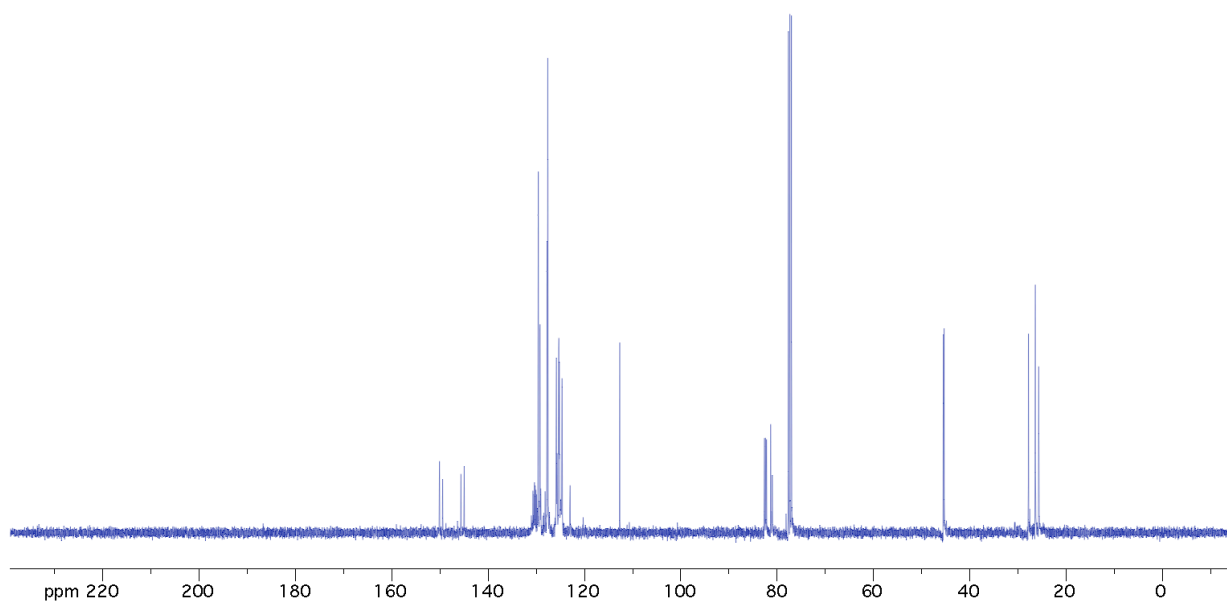

$^{13}\text{C}$ NMR

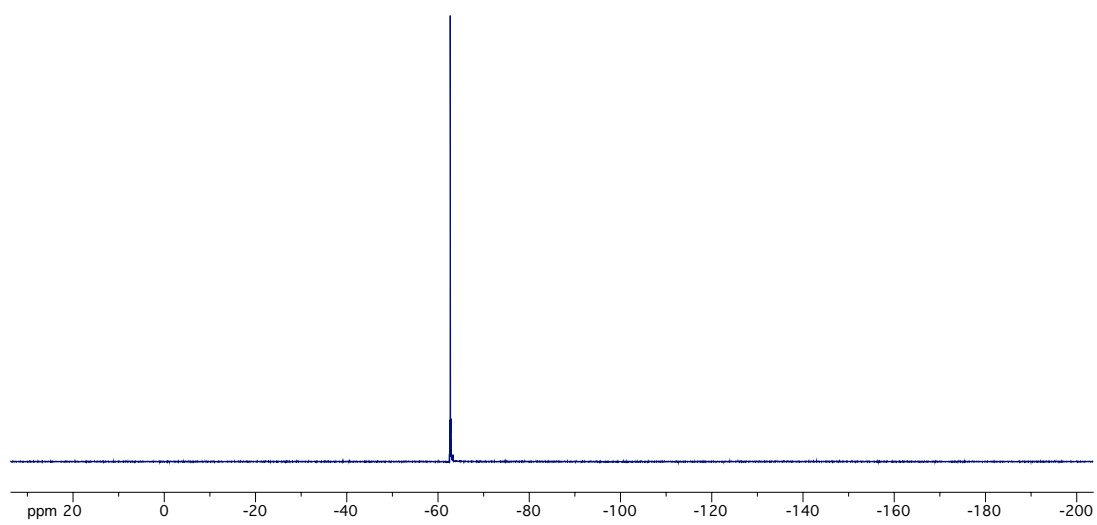

$^{19}\text{F}$ NMR

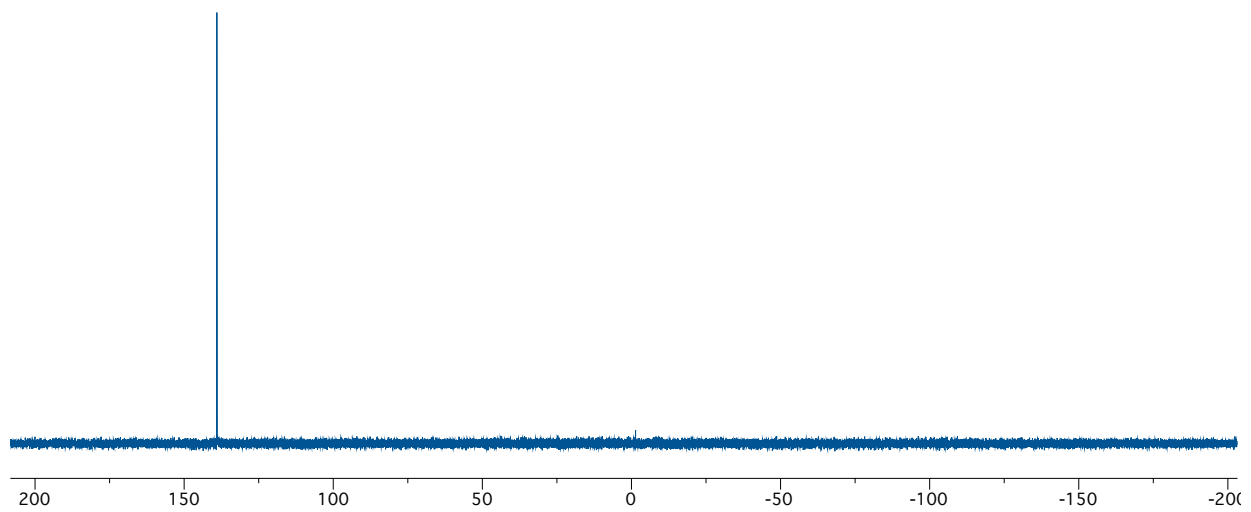

$^{31}\text{P}$ NMR

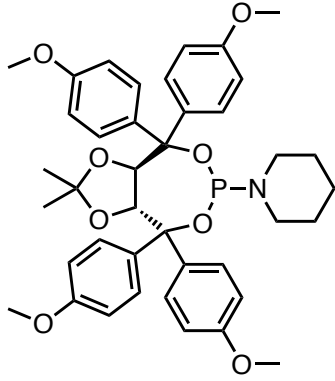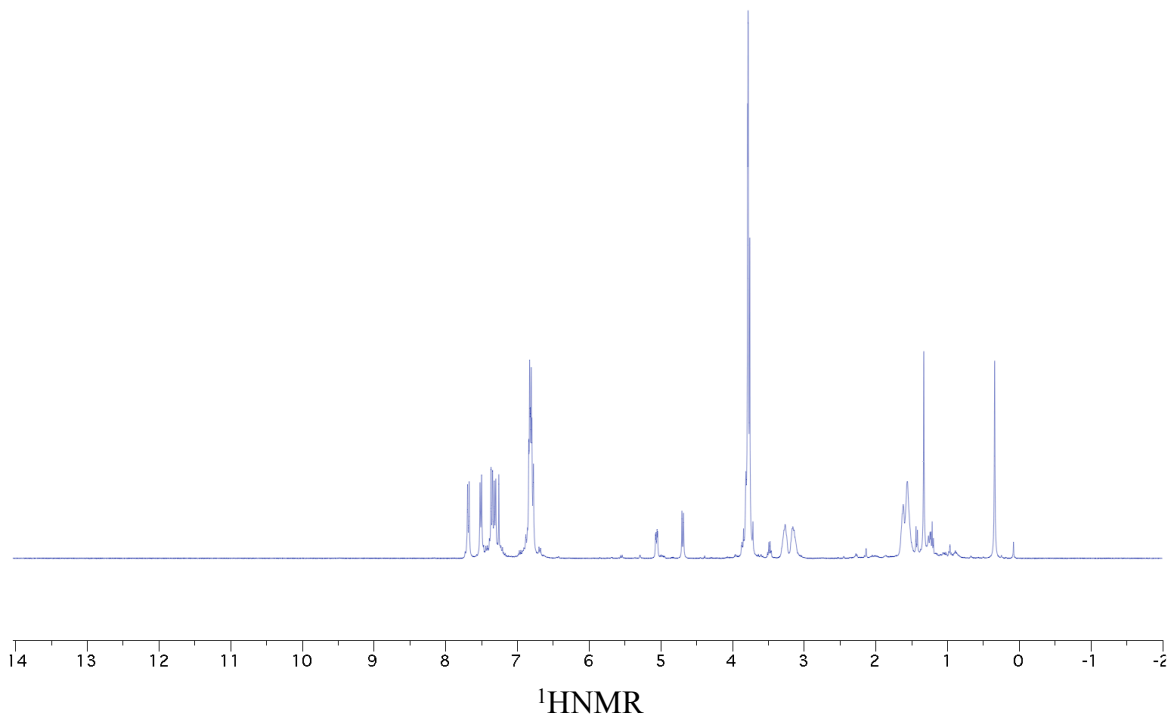

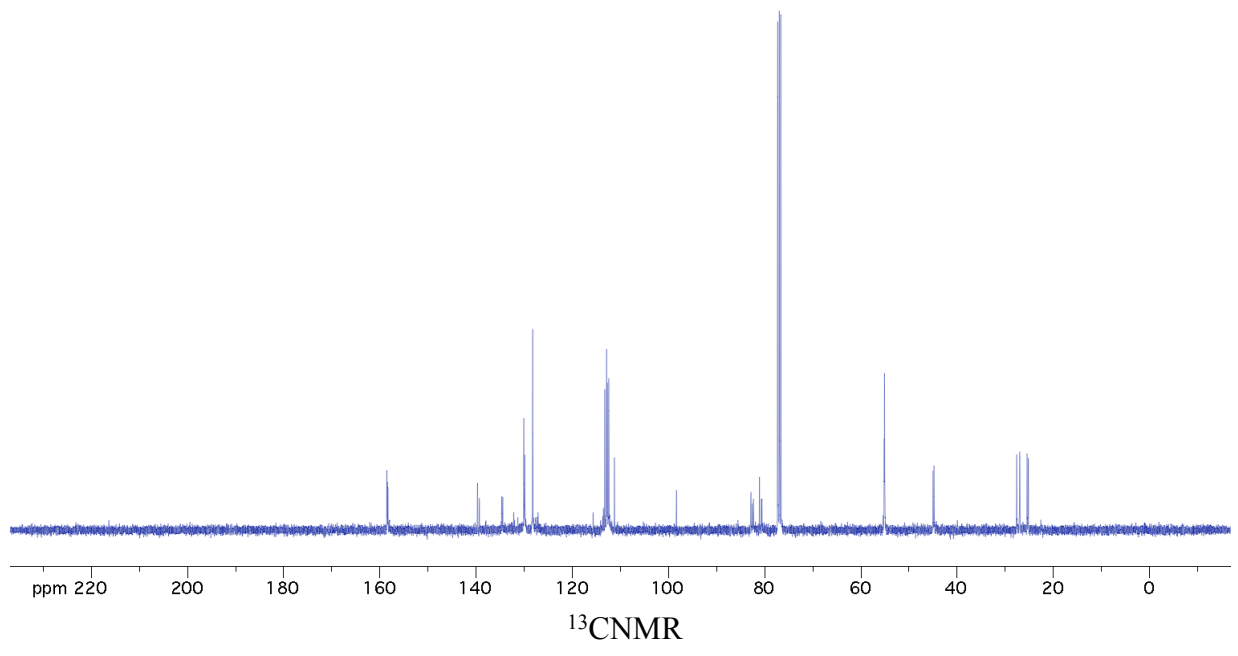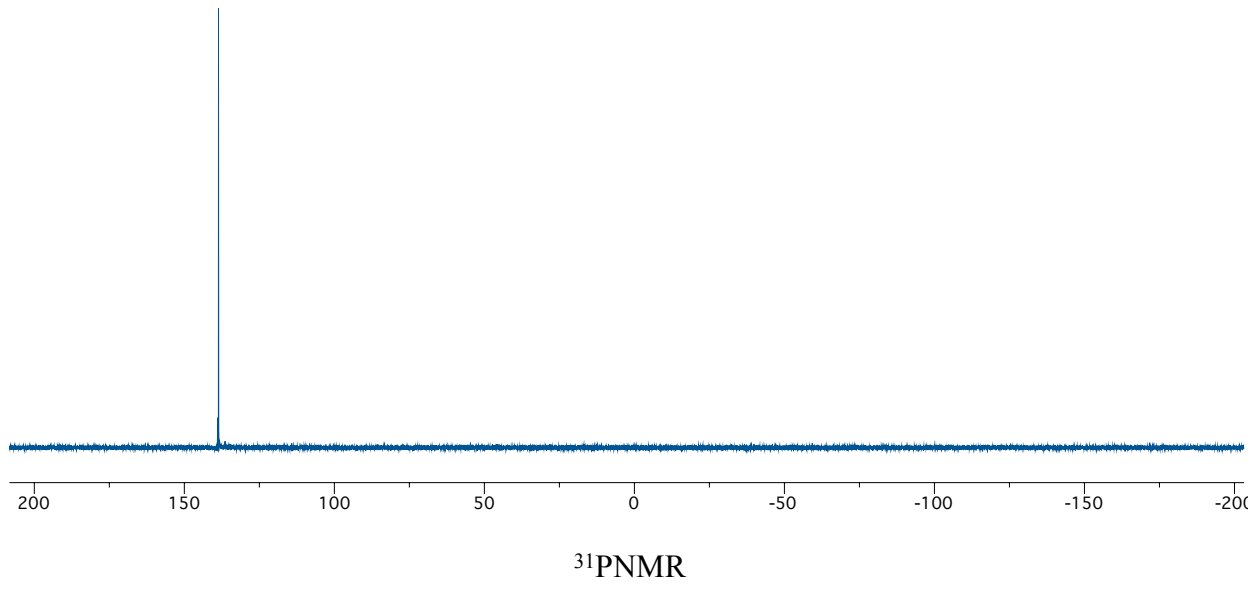

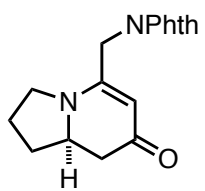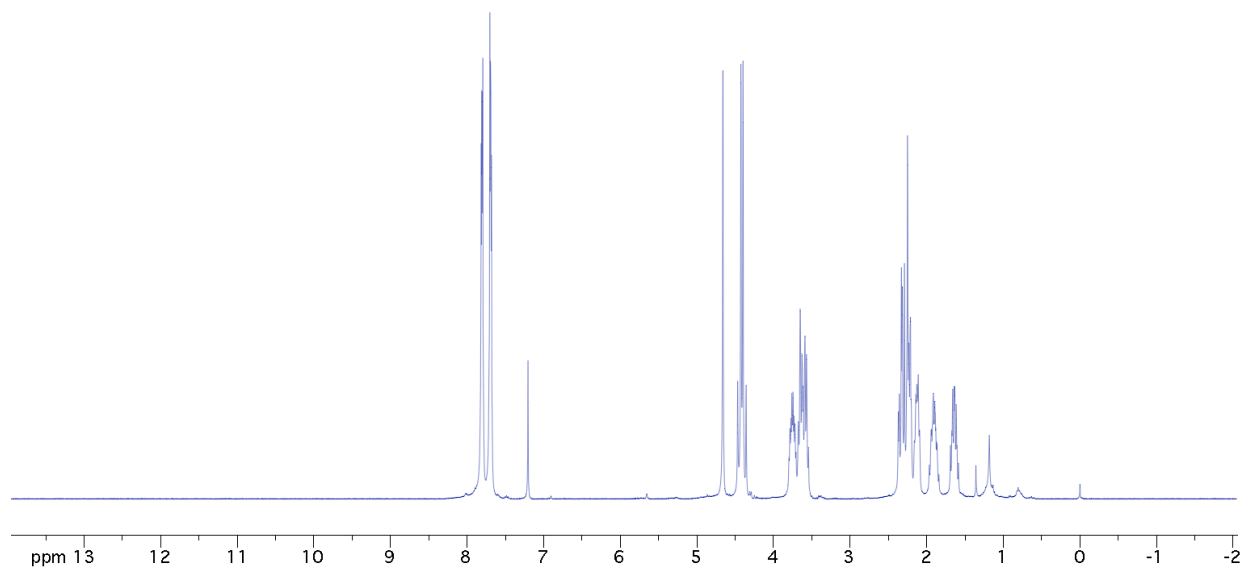

$^1\text{H NMR}$

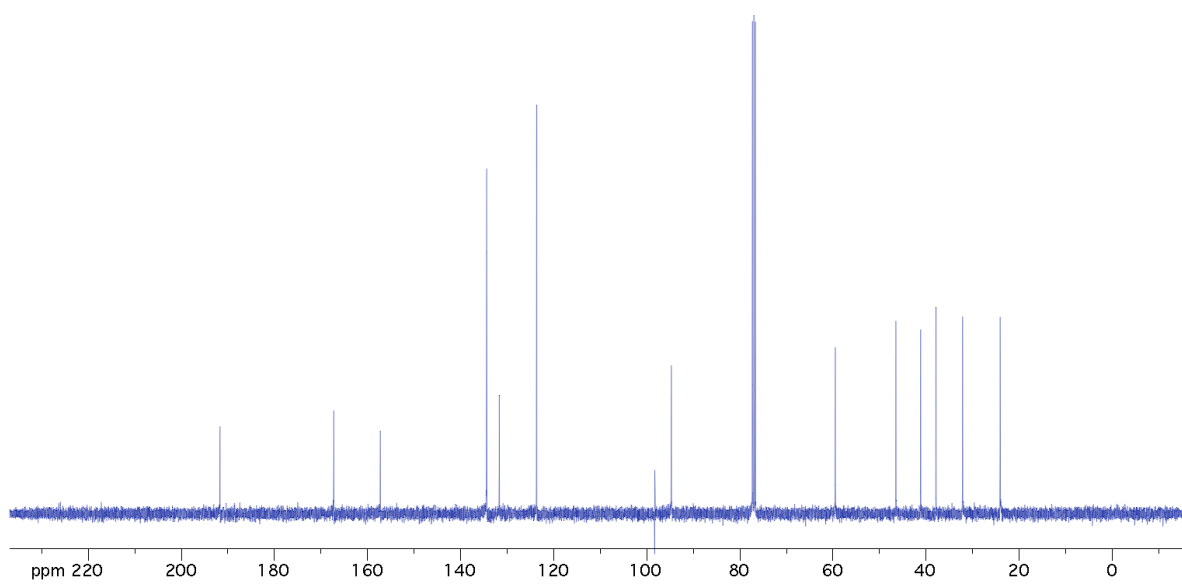



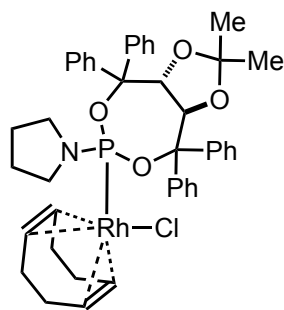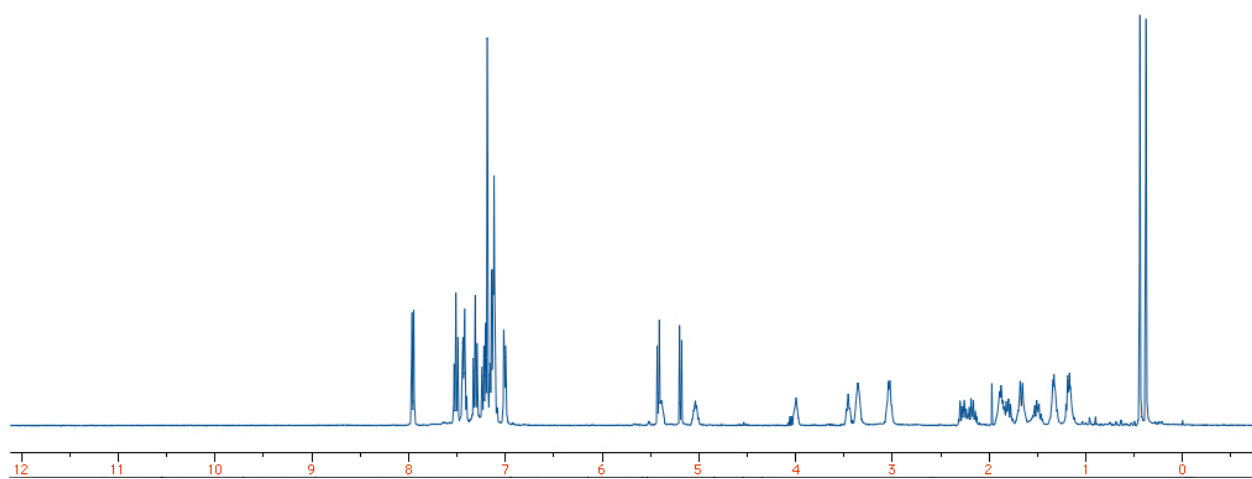

$^1\text{H-NMR Rh(cod)Cl}\cdot\mathbf{T1}$

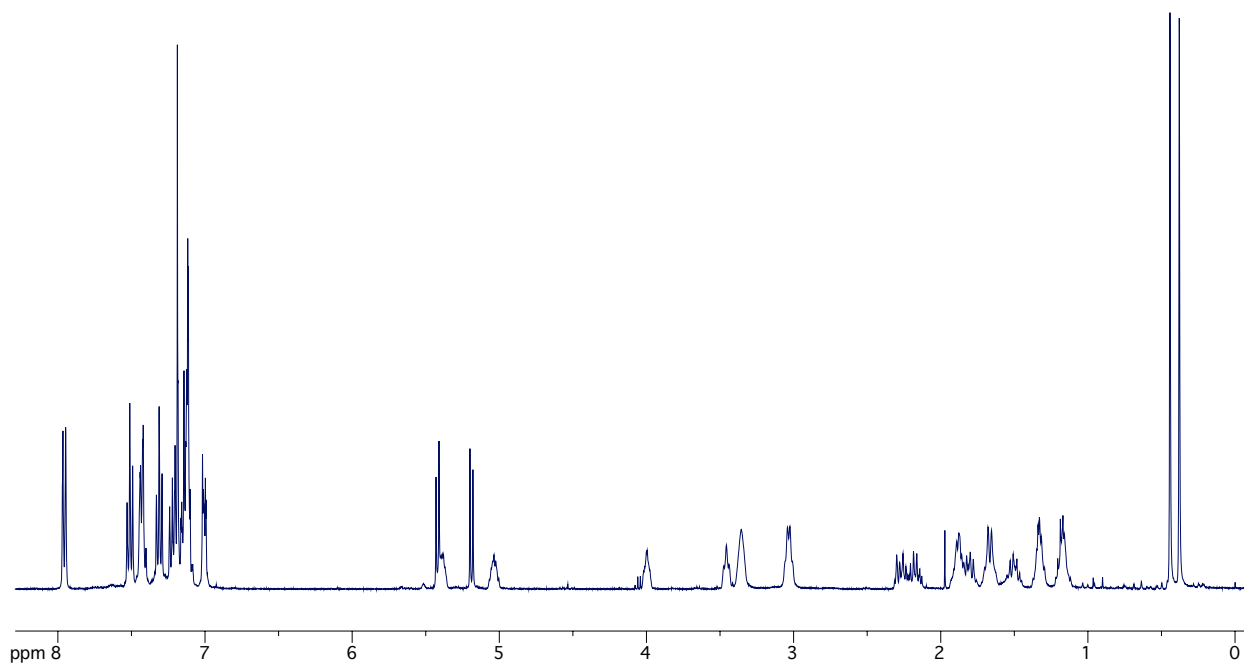

$^1\text{H-NMR}$   $\text{Rh}(\text{cod})\text{Cl}\cdot\text{T1}$

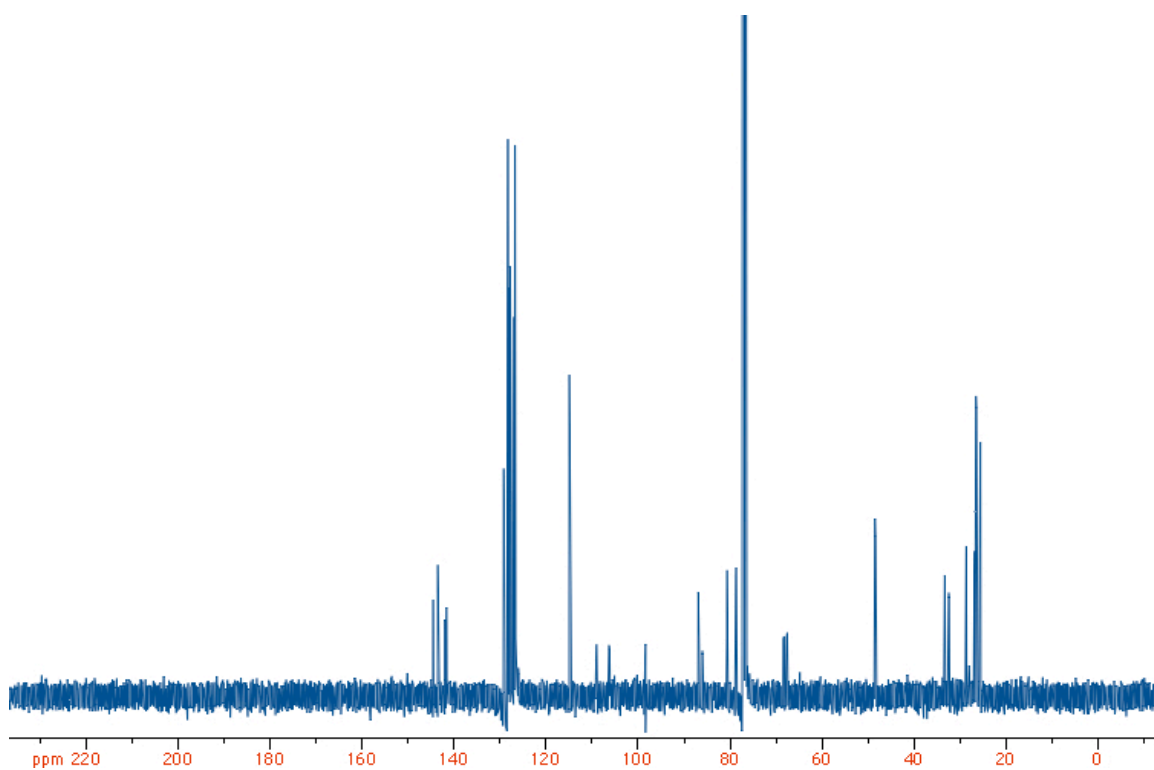

$^{13}\text{C-NMR}$   $\text{Rh}(\text{cod})\text{Cl}\cdot\text{T1}$

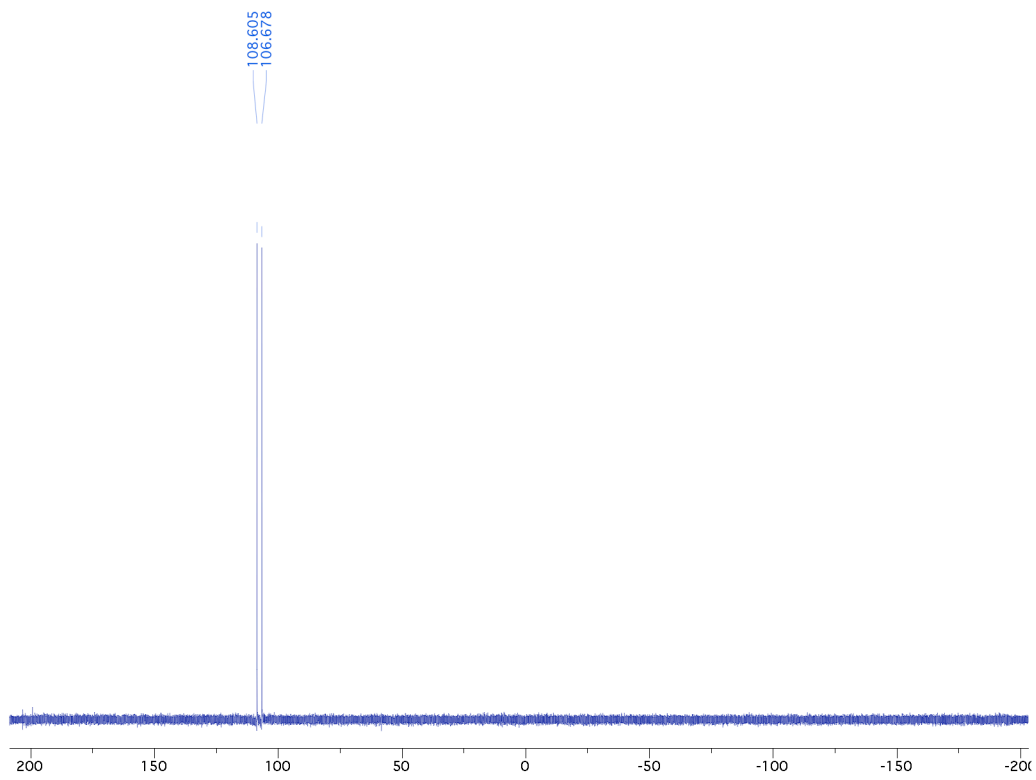

$^{31}\text{P}$ -NMR  $\text{Rh}(\text{cod})\text{Cl}\cdot\text{T1}$

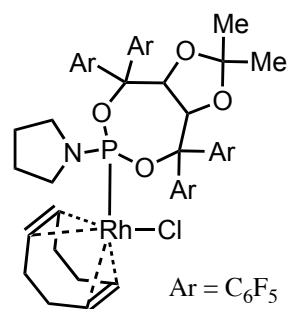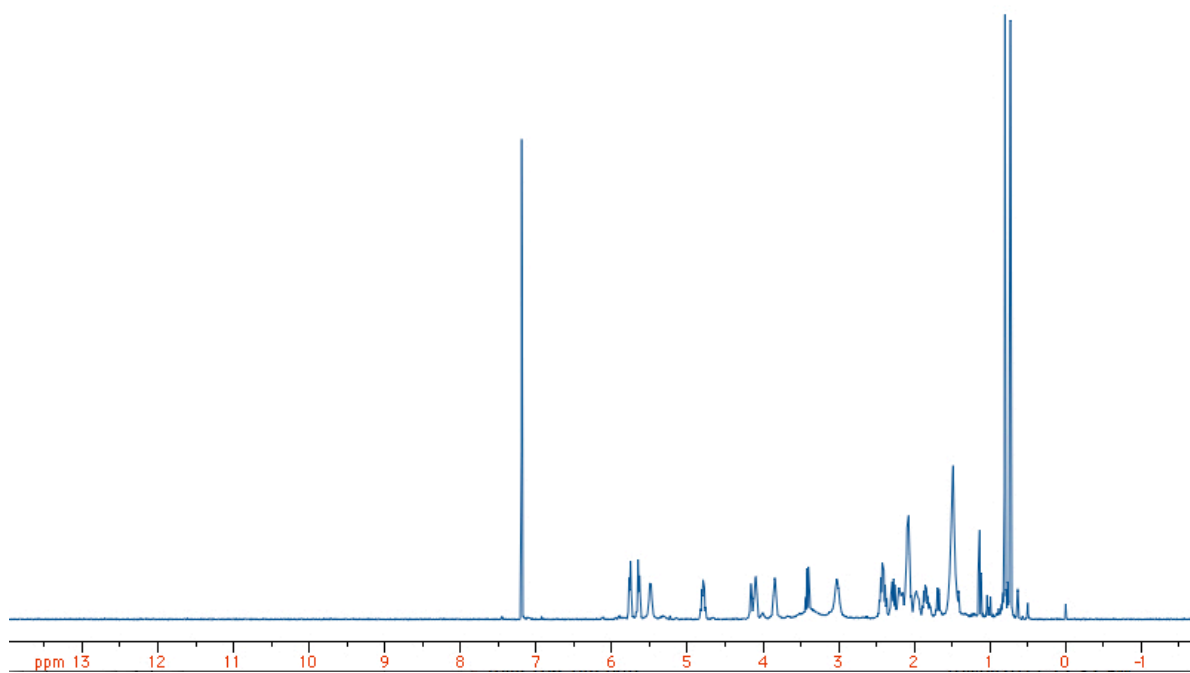

<sup>1</sup>H NMR Rh(cod)Cl•CKphos

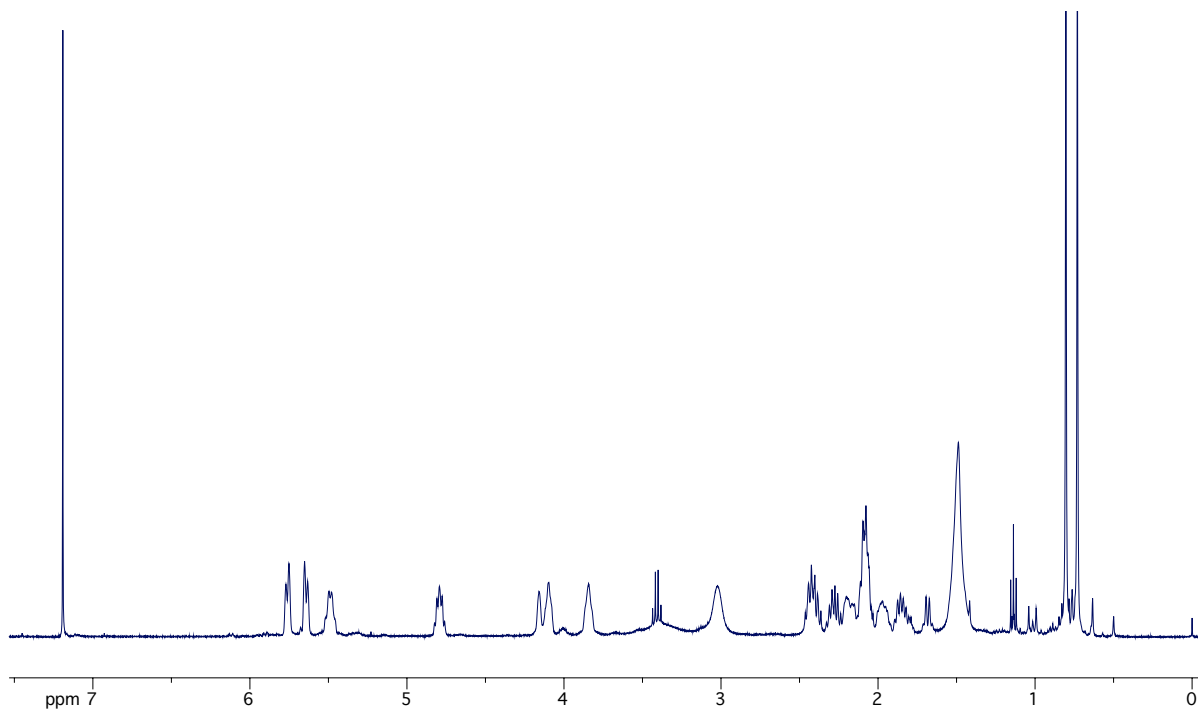

$^1\text{H}$ NMR of  $\text{Rh}(\text{cod})\text{Cl}\cdot\text{CKphos}$

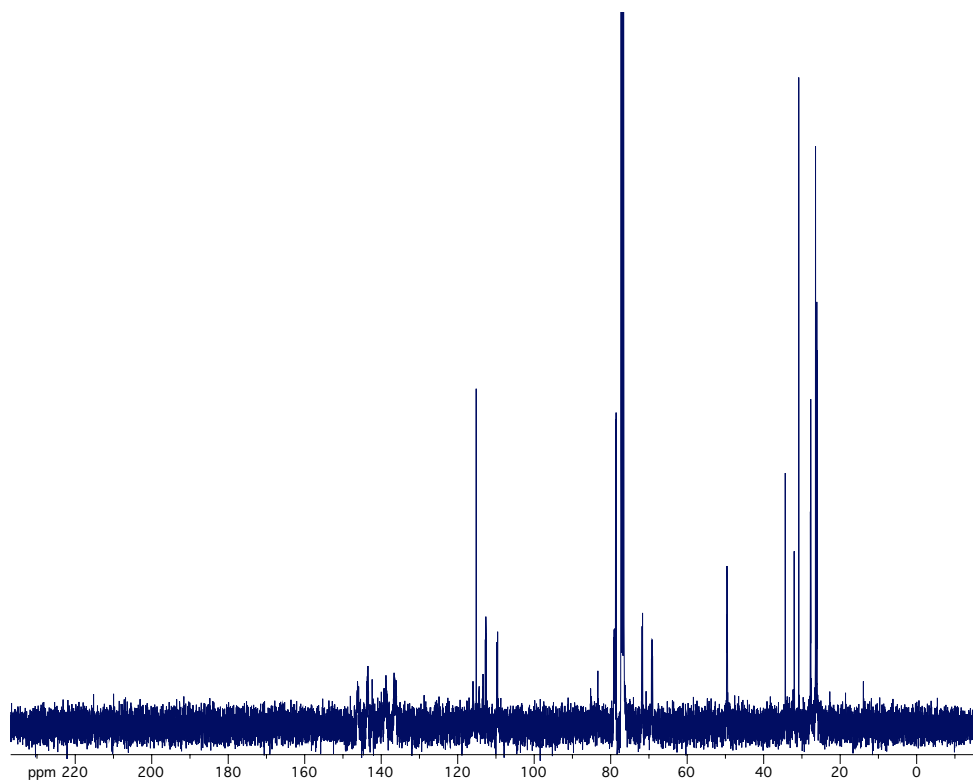

$^{13}\text{C}$ NMR of  $\text{Rh}(\text{cod})\text{Cl}\cdot\text{CKphos}$

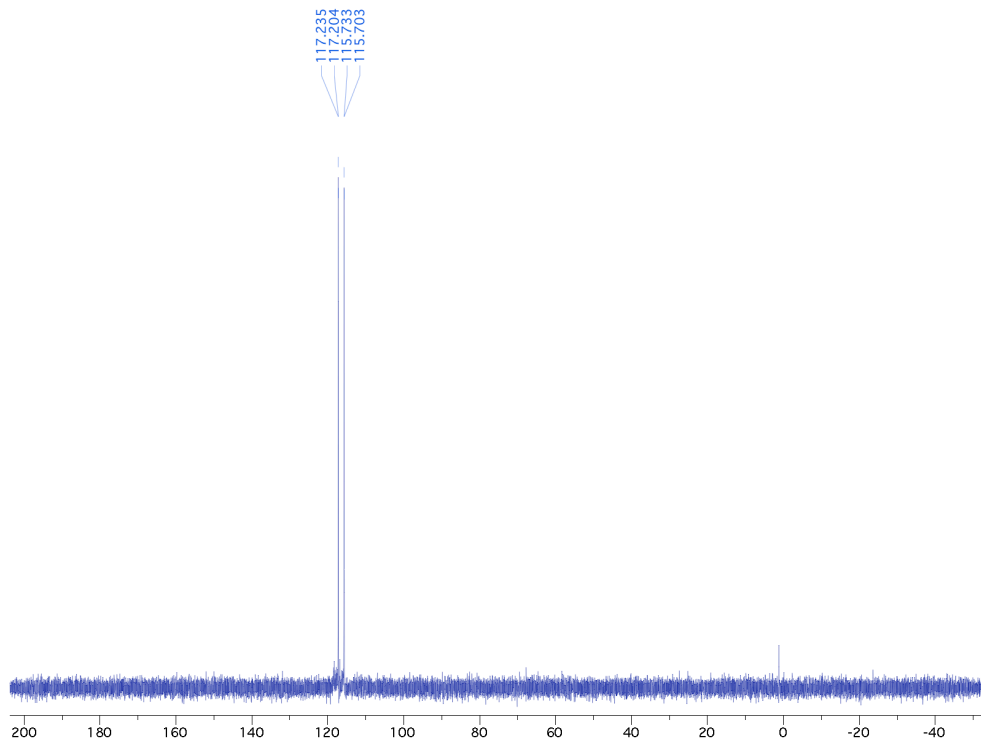

$^{31}\text{P}$ -NMR Rh(cod)Cl·CKphos

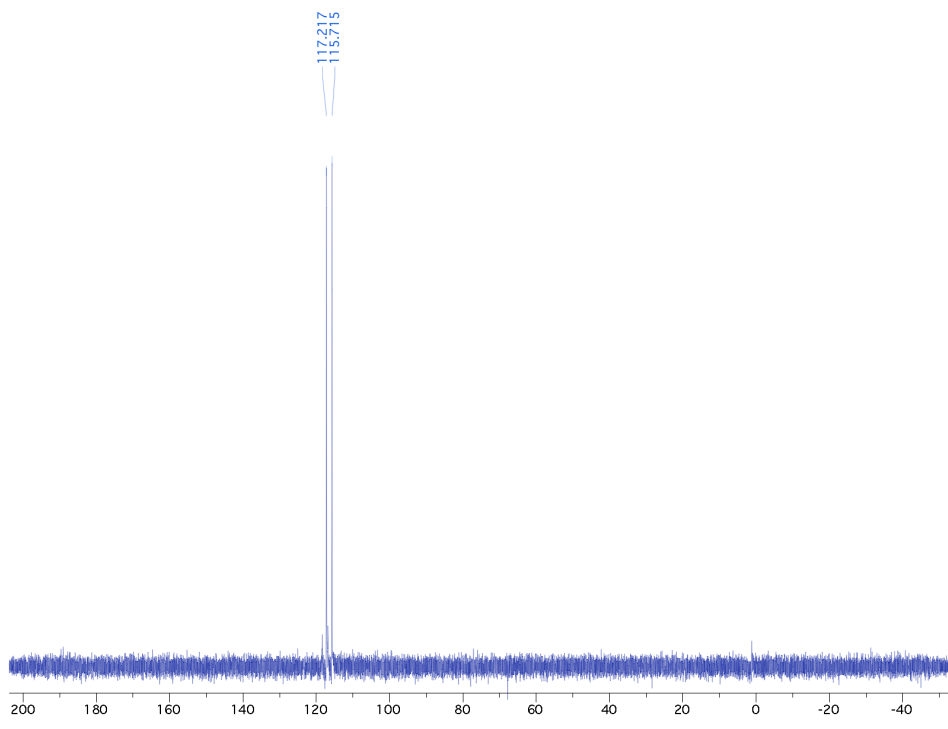

$^{19}\text{F}$ -decoupled  $^{31}\text{P}$ -NMR Rh(cod)Cl·CKphos

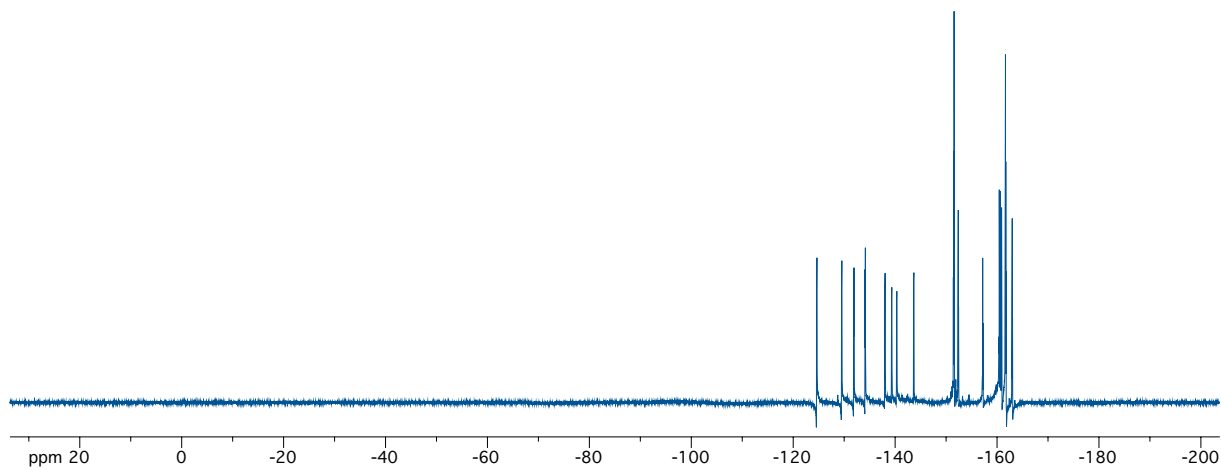

$^{19}\text{F}$ NMR Rh(cod)Cl·CKphos

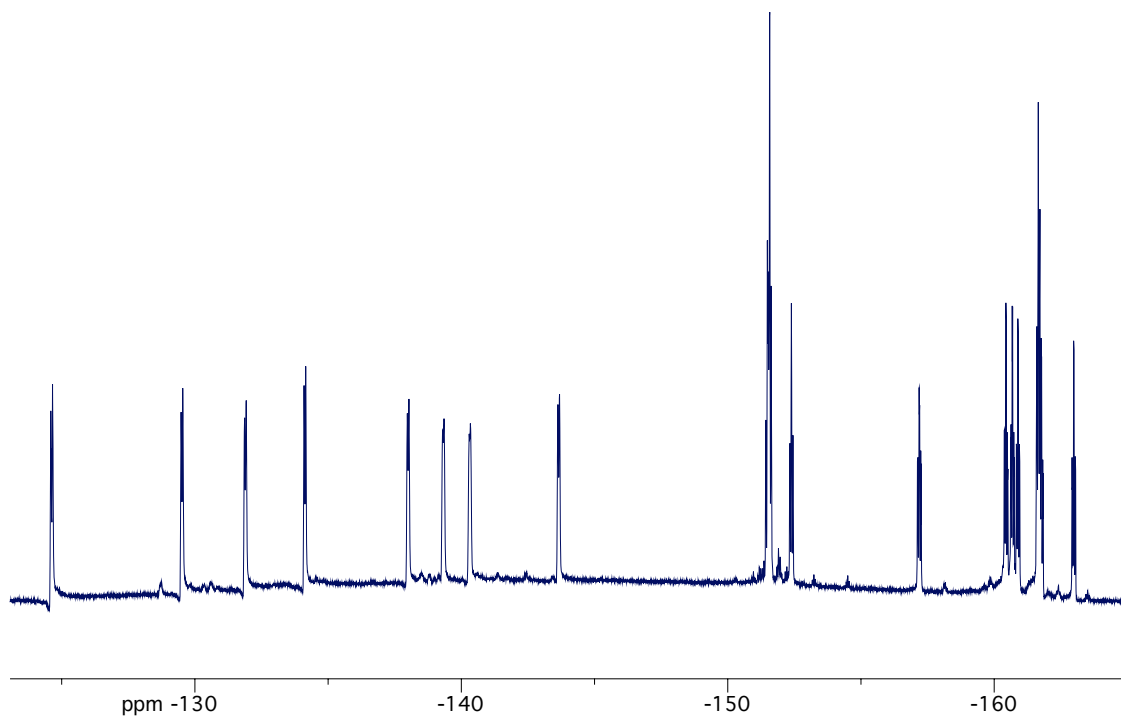

$^{19}\text{F}$ NMR Rh(cod)Cl·CKphos

## 5. X-ray Crystallography Data

All single crystals were coated in oil, transferred to a goniometer head, and mounted on a Bruker Kappa Apex CCD diffractometer under a stream of N<sub>2</sub>. All data collections were performed with Mo K $\alpha$  radiation and a graphite monochromator. Data sets were taken with complete coverage and fourfold redundancy at 120 °K. Data was integrated and corrected for absorption effects with the Apex 2 software package.<sup>5</sup> Structures were solved with the SHELXTL software package.<sup>6</sup> All non-hydrogen atoms were refined with anisotropic thermal parameters and hydrogen atoms placed in idealized positions. Crystal data and structure parameters are provided as CIF files. Rhodium alkene bond distances were generated in XP using the cent/x, join and bang commands.

Rh(cod)X-CKphos complexes were synthesized by adding Rh(cod)Cl (1 equiv.), racemic CKphos (1 equiv), and Ag salt of desired counterion (OTs, OTf, 1 equiv) to an oven dried vial equipped with a magnetic stirbar in an Ar atmosphere glove box. After removal of the vial from the glove box, DCM (1 ml) is added and the solution stirred at rt under Ar flow for 1 h. A white precipitate forms and the solution is filtered through a plug of cotton or glass wool. The clear yellow solution is layered with hexanes and slow evaporation provided yellow X-ray quality crystals.

---

<sup>5</sup> Bruker AXS Inc., 5465 East Cheryl Parkway, Madison, WI 53711-5373 USA

<sup>6</sup> Sheldrick, G. (1997) *SHELXL-97 Program for Crystal Structure Refinement*, Institut für Anorganische Chemie der Universität, Göttingen, Germany.



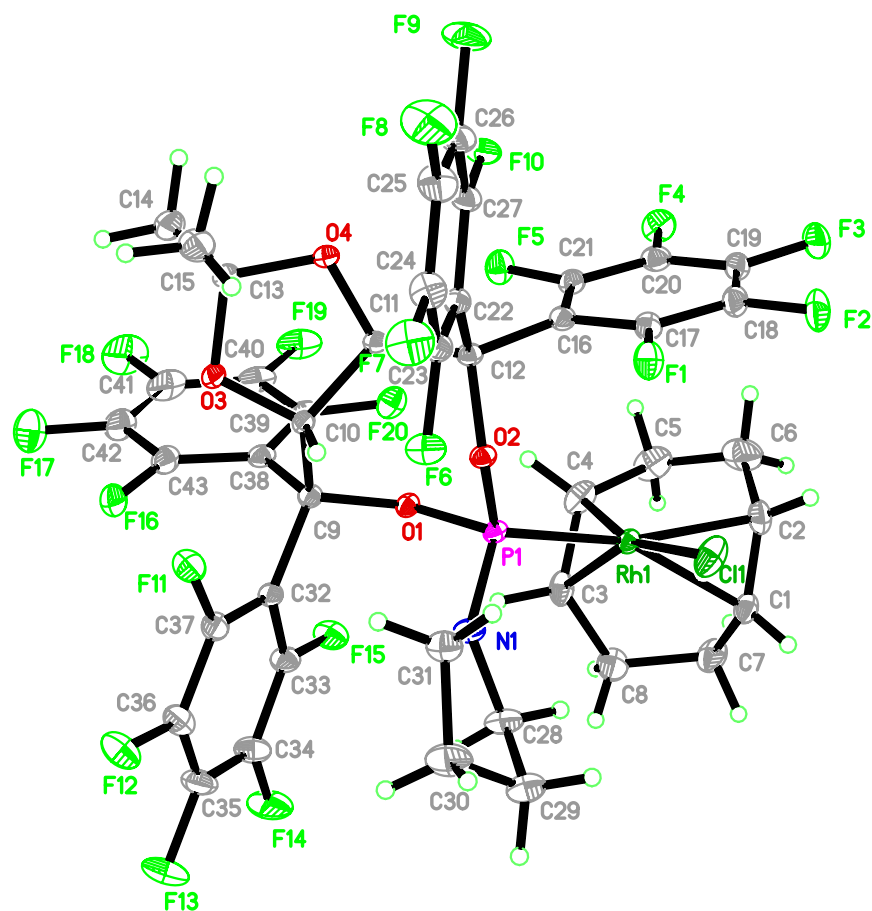

**Table 1.** Crystal data and structure refinement for Rh(cod)Cl•CKphos.

|                        |                                                                                       |                |
|------------------------|---------------------------------------------------------------------------------------|----------------|
| Identification code    | rovis106_0m                                                                           |                |
| Empirical formula      | C <sub>44</sub> H <sub>28</sub> Cl <sub>3</sub> F <sub>20</sub> N O <sub>4</sub> P Rh |                |
| Formula weight         | 1254.90                                                                               |                |
| Temperature            | 120 K                                                                                 |                |
| Wavelength             | 0.71073 Å                                                                             |                |
| Crystal system         | Triclinic                                                                             |                |
| Space group            | <i>P</i> -1                                                                           |                |
| Unit cell dimensions   | a = 11.5246(6) Å                                                                      | α = 68.867(2)° |
|                        | b = 12.6819(7) Å                                                                      | β = 84.990(3)° |
|                        | c = 17.2832(9) Å                                                                      | γ = 77.050(3)° |
| Volume                 | 2296.1(2) Å <sup>3</sup>                                                              |                |
| Z                      | 2                                                                                     |                |
| Density (calculated)   | 1.815 Mg/m <sup>3</sup>                                                               |                |
| Absorption coefficient | 0.709 mm <sup>-1</sup>                                                                |                |

|                                   |                                             |
|-----------------------------------|---------------------------------------------|
| F <sub>000</sub>                  | 1244                                        |
| Crystal size                      | 0.37 x 0.11 x 0.09 mm <sup>3</sup>          |
| Theta range for data collection   | 1.76 to 33.21°.                             |
| Index ranges                      | -17≤h≤17, -18≤k≤19, -26≤l≤26                |
| Reflections collected             | 64119                                       |
| Independent reflections           | 17541 [R <sub>int</sub> = 0.0432]           |
| Completeness to theta = 33.21°    | 99.5 %                                      |
| Absorption correction             | Semi-empirical from equivalents             |
| Max. and min. transmission        | 0.9364 and 0.7794                           |
| Refinement method                 | Full-matrix least-squares on F <sup>2</sup> |
| Data / restraints / parameters    | 17541 / 0 / 669                             |
| Goodness-of-fit on F <sup>2</sup> | 1.091                                       |
| Final R indices [I>2sigma(I)]     | R1 = 0.0495, wR2 = 0.1323                   |
| R indices (all data)              | R1 = 0.0742, wR2 = 0.1536                   |
| Largest diff. peak and hole       | 2.036 and -1.839 e.Å <sup>-3</sup>          |

**Table 2.** Atomic coordinates ( x 10<sup>4</sup>) and equivalent isotropic displacement parameters (Å<sup>2</sup>x 10<sup>3</sup>) for Rh(cod)Cl•CKphos. U(eq) is defined as one third of the trace of the orthogonalized U<sup>ij</sup> tensor.

|       | x              | y       | z     | U(eq) |
|-------|----------------|---------|-------|-------|
| C(1)  | 4215(2)3155(2) | 5437(1) | 22(1) |       |
| C(2)  | 4982(3)3691(3) | 4861(2) | 30(1) |       |
| C(3)  | 4116(3)1588(2) | 4622(2) | 24(1) |       |
| C(4)  | 5032(2)2038(2) | 4109(2) | 26(1) |       |
| C(5)  | 6208(3)2072(3) | 4432(2) | 36(1) |       |
| C(6)  | 6184(3)3148(4) | 4630(2) | 43(1) |       |
| C(7)  | 4521(3)1876(3) | 5951(2) | 30(1) |       |
| C(8)  | 4092(3)1137(2) | 5561(2) | 30(1) |       |
| C(9)  | 2301(2)2121(2) | 2253(1) | 16(1) |       |
| C(10) | 2061(2)3257(2) | 1476(1) | 15(1) |       |
| C(11) | 3153(2)3821(2) | 1330(1) | 15(1) |       |
| C(12) | 2900(2)4844(2) | 1672(1) | 15(1) |       |
| C(13) | 2593(2)3737(2) | 86(1)   | 19(1) |       |
| C(14) | 3383(3)2983(3) | -338(2) | 28(1) |       |

|       |                 |         |        |
|-------|-----------------|---------|--------|
| C(15) | 1716(3)4729(2)  | -493(2) | 29(1)  |
| C(16) | 3968(2)5123(2)  | 1982(1) | 17(1)  |
| C(17) | 3728(2)6064(2)  | 2257(1) | 19(1)  |
| C(18) | 4585(3)6379(2)  | 2584(2) | 23(1)  |
| C(19) | 5745(2)5761(2)  | 2644(2) | 23(1)  |
| C(20) | 6016(2)4830(2)  | 2381(1) | 21(1)  |
| C(21) | 5150(2)4528(2)  | 2047(1) | 19(1)  |
| C(22) | 2279(2)5951(2)  | 985(1)  | 16(1)  |
| C(23) | 1076(2)6441(2)  | 946(1)  | 19(1)  |
| C(24) | 591(2) 7454(2)  | 310(2)  | 26(1)  |
| C(25) | 1315(3)7995(2)  | -314(2) | 30(1)  |
| C(26) | 2517(3)7530(2)  | -300(2) | 27(1)  |
| C(27) | 2979(2)6527(2)  | 338(2)  | 21(1)  |
| C(28) | 860(2) 2786(3)  | 4453(2) | 27(1)  |
| C(29) | -301(3)3470(3)  | 4655(2) | 32(1)  |
| C(30) | -996(3)3863(3)  | 3871(2) | 36(1)  |
| C(31) | -75(2) 4188(2)  | 3184(2) | 25(1)  |
| C(32) | 1214(2)1632(2)  | 2677(1) | 17(1)  |
| C(33) | 1400(2) 693(2)  | 3418(2) | 22(1)  |
| C(34) | 496(3) 164(2)   | 3853(2) | 29(1)  |
| C(35) | -644(3) 557(3)  | 3543(2) | 30(1)  |
| C(36) | -864(2)1468(2)  | 2803(2) | 25(1)  |
| C(37) | 58(2) 1988(2)   | 2380(1) | 20(1)  |
| C(38) | 3175(2)1182(2)  | 2003(1) | 20(1)  |
| C(39) | 4401(2) 873(2)  | 2125(2) | 22(1)  |
| C(40) | 5130(3) 43(2)   | 1858(2) | 29(1)  |
| C(41) | 4655(3)-504(3)  | 1447(2) | 37(1)  |
| C(42) | 3455(3)-227(3)  | 1304(2) | 35(1)  |
| C(43) | 2738(3) 597(2)  | 1576(2) | 25(1)  |
| C(44) | 10079(4)7388(3) | 2918(3) | 52(1)  |
| Cl(1) | 2435(1)5221(1)  | 4101(1) | 31(1)  |
| Cl(2) | 10362(2)8710(1) | 2406(2) | 125(1) |
| Cl(3) | 8680(1)7327(2)  | 3385(1) | 83(1)  |
| F(1)  | 2630(1)6712(1)  | 2198(1) | 25(1)  |
| F(2)  | 4298(2)7288(2)  | 2833(1) | 32(1)  |
| F(3)  | 6594(2)6073(2)  | 2938(1) | 32(1)  |

|       |                 |         |       |
|-------|-----------------|---------|-------|
| F(4)  | 7144(1)4236(2)  | 2425(1) | 30(1) |
| F(5)  | 5523(1)3643(1)  | 1774(1) | 26(1) |
| F(6)  | 295(1)5971(1)   | 1516(1) | 26(1) |
| F(7)  | -576(2)7899(2)  | 320(1)  | 36(1) |
| F(8)  | 858(2)8970(2)   | -924(1) | 45(1) |
| F(9)  | 3238(2)8038(2)  | -899(1) | 40(1) |
| F(10) | 4152(1)6120(1)  | 315(1)  | 26(1) |
| F(11) | -224(1)2841(1)  | 1651(1) | 25(1) |
| F(12) | -1956(2)1832(2) | 2482(1) | 34(1) |
| F(13) | -1516(2)44(2)   | 3954(1) | 42(1) |
| F(14) | 735(2)-729(2)   | 4565(1) | 41(1) |
| F(15) | 2499(1)247(1)   | 3738(1) | 27(1) |
| F(16) | 1577(2)824(2)   | 1411(1) | 29(1) |
| F(17) | 2985(2)-762(2)  | 905(1)  | 52(1) |
| F(18) | 5365(2)-1320(2) | 1197(2) | 56(1) |
| F(19) | 6302(2)-233(2)  | 2013(1) | 37(1) |
| F(20) | 4959(1)1366(1)  | 2506(1) | 26(1) |
| N(1)  | 1041(2)3395(2)  | 3551(1) | 19(1) |
| O(1)  | 2876(1)2383(1)  | 2852(1) | 15(1) |
| O(2)  | 2093(1)4566(1)  | 2365(1) | 15(1) |
| O(3)  | 1987(2)3016(2)  | 750(1)  | 20(1) |
| O(4)  | 3328(2)4200(2)  | 462(1)  | 20(1) |
| P(1)  | 2405(1)3440(1)  | 3210(1) | 14(1) |
| Rh(1) | 3618(1)3408(1)  | 4168(1) | 16(1) |

**Table 3.** Bond lengths [ $\text{\AA}$ ] and angles [ $^\circ$ ] for Rh(cod)Cl•CKphos.

|            |          |            |          |
|------------|----------|------------|----------|
| C(1)-C(2)  | 1.365(4) | C(4)-C(5)  | 1.524(4) |
| C(1)-C(7)  | 1.518(4) | C(4)-Rh(1) | 2.125(3) |
| C(1)-Rh(1) | 2.245(2) | C(5)-C(6)  | 1.516(5) |
| C(2)-C(6)  | 1.491(5) | C(7)-C(8)  | 1.515(4) |
| C(2)-Rh(1) | 2.219(3) | C(9)-O(1)  | 1.445(3) |
| C(3)-C(4)  | 1.403(4) | C(9)-C(32) | 1.533(3) |
| C(3)-C(8)  | 1.514(4) | C(9)-C(38) | 1.541(3) |
| C(3)-Rh(1) | 2.110(3) | C(9)-C(10) | 1.564(3) |

|             |          |                 |            |
|-------------|----------|-----------------|------------|
| C(10)-O(3)  | 1.409(3) | C(30)-C(31)     | 1.525(4)   |
| C(10)-C(11) | 1.541(3) | C(31)-N(1)      | 1.473(3)   |
| C(11)-O(4)  | 1.413(3) | C(32)-C(37)     | 1.388(4)   |
| C(11)-C(12) | 1.571(3) | C(32)-C(33)     | 1.392(3)   |
| C(12)-O(2)  | 1.440(2) | C(33)-F(15)     | 1.344(3)   |
| C(12)-C(16) | 1.541(3) | C(33)-C(34)     | 1.383(3)   |
| C(12)-C(22) | 1.545(3) | C(34)-F(14)     | 1.338(3)   |
| C(13)-O(3)  | 1.425(3) | C(34)-C(35)     | 1.378(4)   |
| C(13)-O(4)  | 1.441(3) | C(35)-F(13)     | 1.332(3)   |
| C(13)-C(14) | 1.511(4) | C(35)-C(36)     | 1.377(4)   |
| C(13)-C(15) | 1.518(4) | C(36)-F(12)     | 1.334(3)   |
| C(16)-C(21) | 1.394(3) | C(36)-C(37)     | 1.389(3)   |
| C(16)-C(17) | 1.401(3) | C(37)-F(11)     | 1.339(3)   |
| C(17)-F(1)  | 1.336(3) | C(38)-C(39)     | 1.393(4)   |
| C(17)-C(18) | 1.376(4) | C(38)-C(43)     | 1.407(4)   |
| C(18)-F(2)  | 1.336(3) | C(39)-F(20)     | 1.337(3)   |
| C(18)-C(19) | 1.382(4) | C(39)-C(40)     | 1.383(4)   |
| C(19)-F(3)  | 1.333(3) | C(40)-F(19)     | 1.343(4)   |
| C(19)-C(20) | 1.377(4) | C(40)-C(41)     | 1.371(5)   |
| C(20)-F(4)  | 1.341(3) | C(41)-F(18)     | 1.344(3)   |
| C(20)-C(21) | 1.381(4) | C(41)-C(42)     | 1.371(5)   |
| C(21)-F(5)  | 1.341(3) | C(42)-F(17)     | 1.339(4)   |
| C(22)-C(23) | 1.384(3) | C(42)-C(43)     | 1.376(4)   |
| C(22)-C(27) | 1.397(3) | C(43)-F(16)     | 1.337(3)   |
| C(23)-F(6)  | 1.341(3) | C(44)-Cl(2)     | 1.681(4)   |
| C(23)-C(24) | 1.392(3) | C(44)-Cl(3)     | 1.743(4)   |
| C(24)-F(7)  | 1.337(3) | Cl(1)-Rh(1)     | 2.3645(7)  |
| C(24)-C(25) | 1.376(4) | N(1)-P(1)       | 1.636(2)   |
| C(25)-F(8)  | 1.336(3) | O(1)-P(1)       | 1.6390(17) |
| C(25)-C(26) | 1.378(4) | O(2)-P(1)       | 1.6309(16) |
| C(26)-F(9)  | 1.337(3) | P(1)-Rh(1)      | 2.2423(6)  |
| C(26)-C(27) | 1.379(3) | C(2)-C(1)-C(7)  | 122.2(3)   |
| C(27)-F(10) | 1.337(3) | C(2)-C(1)-Rh(1) | 71.18(15)  |
| C(28)-N(1)  | 1.489(3) | C(7)-C(1)-Rh(1) | 110.13(17) |
| C(28)-C(29) | 1.511(4) | C(1)-C(2)-C(6)  | 127.1(3)   |
| C(29)-C(30) | 1.500(5) | C(1)-C(2)-Rh(1) | 73.21(16)  |

|                   |            |                   |          |
|-------------------|------------|-------------------|----------|
| C(6)-C(2)-Rh(1)   | 108.7(2)   | C(21)-C(16)-C(12) | 127.8(2) |
| C(4)-C(3)-C(8)    | 126.5(3)   | C(17)-C(16)-C(12) | 116.8(2) |
| C(4)-C(3)-Rh(1)   | 71.24(15)  | F(1)-C(17)-C(18)  | 116.8(2) |
| C(8)-C(3)-Rh(1)   | 109.84(18) | F(1)-C(17)-C(16)  | 120.1(2) |
| C(3)-C(4)-C(5)    | 123.8(2)   | C(18)-C(17)-C(16) | 123.0(2) |
| C(3)-C(4)-Rh(1)   | 70.06(15)  | F(2)-C(18)-C(17)  | 120.1(2) |
| C(5)-C(4)-Rh(1)   | 113.3(2)   | F(2)-C(18)-C(19)  | 120.2(2) |
| C(6)-C(5)-C(4)    | 114.1(3)   | C(17)-C(18)-C(19) | 119.7(2) |
| C(2)-C(6)-C(5)    | 114.1(3)   | F(3)-C(19)-C(20)  | 120.4(2) |
| C(8)-C(7)-C(1)    | 112.7(2)   | F(3)-C(19)-C(18)  | 120.6(2) |
| C(3)-C(8)-C(7)    | 114.5(2)   | C(20)-C(19)-C(18) | 119.0(2) |
| O(1)-C(9)-C(32)   | 107.81(17) | F(4)-C(20)-C(19)  | 119.4(2) |
| O(1)-C(9)-C(38)   | 108.55(19) | F(4)-C(20)-C(21)  | 119.9(2) |
| C(32)-C(9)-C(38)  | 108.55(18) | C(19)-C(20)-C(21) | 120.8(2) |
| O(1)-C(9)-C(10)   | 106.04(17) | F(5)-C(21)-C(20)  | 115.8(2) |
| C(32)-C(9)-C(10)  | 116.94(19) | F(5)-C(21)-C(16)  | 122.1(2) |
| C(38)-C(9)-C(10)  | 108.68(17) | C(20)-C(21)-C(16) | 122.1(2) |
| O(3)-C(10)-C(11)  | 104.46(17) | C(23)-C(22)-C(27) | 115.7(2) |
| O(3)-C(10)-C(9)   | 111.13(19) | C(23)-C(22)-C(12) | 126.0(2) |
| C(11)-C(10)-C(9)  | 108.50(19) | C(27)-C(22)-C(12) | 118.2(2) |
| O(4)-C(11)-C(10)  | 104.44(18) | F(6)-C(23)-C(22)  | 122.3(2) |
| O(4)-C(11)-C(12)  | 112.39(17) | F(6)-C(23)-C(24)  | 115.4(2) |
| C(10)-C(11)-C(12) | 110.19(18) | C(22)-C(23)-C(24) | 122.4(2) |
| O(2)-C(12)-C(16)  | 106.41(17) | F(7)-C(24)-C(25)  | 120.8(2) |
| O(2)-C(12)-C(22)  | 108.60(18) | F(7)-C(24)-C(23)  | 119.3(2) |
| C(16)-C(12)-C(22) | 107.92(18) | C(25)-C(24)-C(23) | 119.9(3) |
| O(2)-C(12)-C(11)  | 107.52(16) | F(8)-C(25)-C(24)  | 120.3(3) |
| C(16)-C(12)-C(11) | 117.72(19) | F(8)-C(25)-C(26)  | 120.1(3) |
| C(22)-C(12)-C(11) | 108.39(18) | C(24)-C(25)-C(26) | 119.5(2) |
| O(3)-C(13)-O(4)   | 106.27(17) | F(9)-C(26)-C(25)  | 120.7(2) |
| O(3)-C(13)-C(14)  | 107.8(2)   | F(9)-C(26)-C(27)  | 119.8(3) |
| O(4)-C(13)-C(14)  | 109.0(2)   | C(25)-C(26)-C(27) | 119.6(2) |
| O(3)-C(13)-C(15)  | 110.9(2)   | F(10)-C(27)-C(26) | 116.6(2) |
| O(4)-C(13)-C(15)  | 108.9(2)   | F(10)-C(27)-C(22) | 120.5(2) |
| C(14)-C(13)-C(15) | 113.6(2)   | C(26)-C(27)-C(22) | 122.9(2) |
| C(21)-C(16)-C(17) | 115.4(2)   | N(1)-C(28)-C(29)  | 104.0(2) |

|                   |          |                   |            |
|-------------------|----------|-------------------|------------|
| C(30)-C(29)-C(28) | 102.7(2) | F(17)-C(42)-C(43) | 120.4(3)   |
| C(29)-C(30)-C(31) | 103.9(2) | C(41)-C(42)-C(43) | 119.6(3)   |
| N(1)-C(31)-C(30)  | 103.6(2) | F(16)-C(43)-C(42) | 116.3(3)   |
| C(37)-C(32)-C(33) | 115.5(2) | F(16)-C(43)-C(38) | 120.6(2)   |
| C(37)-C(32)-C(9)  | 126.9(2) | C(42)-C(43)-C(38) | 123.2(3)   |
| C(33)-C(32)-C(9)  | 117.5(2) | Cl(2)-C(44)-Cl(3) | 116.8(2)   |
| F(15)-C(33)-C(34) | 116.7(2) | C(31)-N(1)-C(28)  | 109.80(19) |
| F(15)-C(33)-C(32) | 120.2(2) | C(31)-N(1)-P(1)   | 128.56(16) |
| C(34)-C(33)-C(32) | 123.1(3) | C(28)-N(1)-P(1)   | 117.95(17) |
| F(14)-C(34)-C(35) | 120.5(2) | C(9)-O(1)-P(1)    | 127.67(15) |
| F(14)-C(34)-C(33) | 120.0(3) | C(12)-O(2)-P(1)   | 123.75(14) |
| C(35)-C(34)-C(33) | 119.5(2) | C(10)-O(3)-C(13)  | 109.76(17) |
| F(13)-C(35)-C(36) | 120.6(3) | C(11)-O(4)-C(13)  | 110.40(16) |
| F(13)-C(35)-C(34) | 120.0(3) | O(2)-P(1)-N(1)    | 97.71(9)   |
| C(36)-C(35)-C(34) | 119.4(2) | O(2)-P(1)-O(1)    | 102.68(8)  |
| F(12)-C(36)-C(35) | 120.0(2) | N(1)-P(1)-O(1)    | 108.16(10) |
| F(12)-C(36)-C(37) | 120.1(2) | O(2)-P(1)-Rh(1)   | 120.99(7)  |
| C(35)-C(36)-C(37) | 119.9(3) | N(1)-P(1)-Rh(1)   | 112.80(8)  |
| F(11)-C(37)-C(32) | 121.3(2) | O(1)-P(1)-Rh(1)   | 112.84(7)  |
| F(11)-C(37)-C(36) | 116.1(2) | C(3)-Rh(1)-C(4)   | 38.69(11)  |
| C(32)-C(37)-C(36) | 122.6(2) | C(3)-Rh(1)-C(2)   | 95.88(11)  |
| C(39)-C(38)-C(43) | 114.7(2) | C(4)-Rh(1)-C(2)   | 81.07(12)  |
| C(39)-C(38)-C(9)  | 126.2(2) | C(3)-Rh(1)-P(1)   | 93.08(8)   |
| C(43)-C(38)-C(9)  | 119.0(2) | C(4)-Rh(1)-P(1)   | 99.74(8)   |
| F(20)-C(39)-C(40) | 115.2(3) | C(2)-Rh(1)-P(1)   | 166.24(8)  |
| F(20)-C(39)-C(38) | 122.2(2) | C(3)-Rh(1)-C(1)   | 81.50(10)  |
| C(40)-C(39)-C(38) | 122.7(3) | C(4)-Rh(1)-C(1)   | 89.82(10)  |
| F(19)-C(40)-C(41) | 120.2(3) | C(2)-Rh(1)-C(1)   | 35.60(10)  |
| F(19)-C(40)-C(39) | 119.7(3) | P(1)-Rh(1)-C(1)   | 157.25(7)  |
| C(41)-C(40)-C(39) | 120.1(3) | C(3)-Rh(1)-Cl(1)  | 155.33(8)  |
| F(18)-C(41)-C(42) | 120.3(3) | C(4)-Rh(1)-Cl(1)  | 164.91(8)  |
| F(18)-C(41)-C(40) | 120.0(3) | C(2)-Rh(1)-Cl(1)  | 89.33(9)   |
| C(42)-C(41)-C(40) | 119.7(3) | P(1)-Rh(1)-Cl(1)  | 86.84(2)   |
| F(17)-C(42)-C(41) | 120.0(3) | C(1)-Rh(1)-Cl(1)  | 89.08(7)   |

Symmetry transformations used to generate equivalent atoms:

**Table 4.** Anisotropic displacement parameters ( $\text{\AA}^2 \times 10^3$ ) for Rh(cod)Cl•CKphos. The anisotropic displacement factor exponent takes the form:  $-2p^2 [ h^2 a^* 2U^{11} + \dots + 2 h k a^* b^* U^{12} ]$

|       | U <sup>11</sup> | U <sup>22</sup> | U <sup>33</sup> | U <sup>23</sup> | U <sup>13</sup> | U <sup>12</sup> |
|-------|-----------------|-----------------|-----------------|-----------------|-----------------|-----------------|
| C(1)  | 31(1)           | 20(1)           | 16(1)           | -7(1)           | -4(1)           | -5(1)           |
| C(2)  | 35(2)           | 34(2)           | 29(1)           | -16(1)          | -5(1)           | -16(1)          |
| C(3)  | 32(1)           | 15(1)           | 25(1)           | -9(1)           | -8(1)           | 0(1)            |
| C(4)  | 23(1)           | 28(1)           | 22(1)           | -10(1)          | -5(1)           | 8(1)            |
| C(5)  | 20(1)           | 52(2)           | 30(1)           | -13(1)          | -5(1)           | 3(1)            |
| C(6)  | 28(2)           | 66(2)           | 34(2)           | -7(2)           | -4(1)           | -20(2)          |
| C(7)  | 42(2)           | 27(1)           | 18(1)           | -5(1)           | -6(1)           | -5(1)           |
| C(8)  | 46(2)           | 18(1)           | 24(1)           | -2(1)           | -3(1)           | -9(1)           |
| C(9)  | 21(1)           | 12(1)           | 13(1)           | -3(1)           | 1(1)            | -4(1)           |
| C(10) | 21(1)           | 14(1)           | 12(1)           | -5(1)           | 2(1)            | -6(1)           |
| C(11) | 18(1)           | 14(1)           | 13(1)           | -4(1)           | 2(1)            | -6(1)           |
| C(12) | 17(1)           | 13(1)           | 13(1)           | -3(1)           | 1(1)            | -3(1)           |
| C(13) | 26(1)           | 19(1)           | 13(1)           | -6(1)           | 3(1)            | -9(1)           |
| C(14) | 33(1)           | 29(1)           | 26(1)           | -16(1)          | 9(1)            | -10(1)          |
| C(15) | 32(1)           | 25(1)           | 23(1)           | 0(1)            | -5(1)           | -7(1)           |
| C(16) | 20(1)           | 14(1)           | 15(1)           | -4(1)           | 0(1)            | -4(1)           |
| C(17) | 23(1)           | 15(1)           | 18(1)           | -4(1)           | -2(1)           | -4(1)           |
| C(18) | 34(1)           | 17(1)           | 20(1)           | -7(1)           | -2(1)           | -8(1)           |
| C(19) | 28(1)           | 28(1)           | 17(1)           | -7(1)           | -2(1)           | -14(1)          |
| C(20) | 20(1)           | 25(1)           | 17(1)           | -4(1)           | -1(1)           | -6(1)           |
| C(21) | 21(1)           | 19(1)           | 16(1)           | -5(1)           | 1(1)            | -5(1)           |
| C(22) | 21(1)           | 13(1)           | 15(1)           | -3(1)           | -1(1)           | -4(1)           |
| C(23) | 23(1)           | 17(1)           | 18(1)           | -5(1)           | 0(1)            | -4(1)           |
| C(24) | 25(1)           | 21(1)           | 27(1)           | -4(1)           | -7(1)           | 0(1)            |
| C(25) | 41(2)           | 15(1)           | 25(1)           | 5(1)            | -10(1)          | -4(1)           |
| C(26) | 34(1)           | 21(1)           | 21(1)           | 3(1)            | -2(1)           | -10(1)          |
| C(27) | 25(1)           | 19(1)           | 18(1)           | -1(1)           | -1(1)           | -9(1)           |
| C(28) | 21(1)           | 33(2)           | 21(1)           | -4(1)           | 6(1)            | -3(1)           |



|       |        |        |        |        |        |        |
|-------|--------|--------|--------|--------|--------|--------|
| C(29) | 28(1)  | 38(2)  | 29(1)  | -13(1) | 9(1)   | -6(1)  |
| C(30) | 20(1)  | 43(2)  | 38(2)  | -10(1) | 6(1)   | -2(1)  |
| C(31) | 20(1)  | 27(1)  | 24(1)  | -5(1)  | -1(1)  | -2(1)  |
| C(32) | 23(1)  | 15(1)  | 14(1)  | -4(1)  | 2(1)   | -7(1)  |
| C(33) | 28(1)  | 18(1)  | 18(1)  | -2(1)  | 2(1)   | -7(1)  |
| C(34) | 36(2)  | 24(1)  | 22(1)  | 1(1)   | 5(1)   | -13(1) |
| C(35) | 30(1)  | 29(1)  | 31(1)  | -9(1)  | 12(1)  | -16(1) |
| C(36) | 21(1)  | 24(1)  | 32(1)  | -11(1) | 2(1)   | -7(1)  |
| C(37) | 25(1)  | 16(1)  | 18(1)  | -5(1)  | 0(1)   | -6(1)  |
| C(38) | 29(1)  | 14(1)  | 16(1)  | -5(1)  | 6(1)   | -7(1)  |
| C(39) | 29(1)  | 16(1)  | 17(1)  | -4(1)  | 5(1)   | -2(1)  |
| C(40) | 35(2)  | 16(1)  | 28(1)  | -5(1)  | 12(1)  | 1(1)   |
| C(41) | 56(2)  | 18(1)  | 38(2)  | -17(1) | 20(2)  | -5(1)  |
| C(42) | 54(2)  | 26(2)  | 32(1)  | -19(1) | 14(1)  | -16(1) |
| C(43) | 37(1)  | 18(1)  | 21(1)  | -9(1)  | 5(1)   | -9(1)  |
| C(44) | 55(2)  | 38(2)  | 57(2)  | -13(2) | 12(2)  | -7(2)  |
| Cl(1) | 46(1)  | 18(1)  | 24(1)  | -10(1) | -6(1)  | 7(1)   |
| Cl(2) | 118(1) | 32(1)  | 198(2) | -25(1) | 73(1)  | -15(1) |
| Cl(3) | 50(1)  | 118(1) | 85(1)  | -43(1) | 16(1)  | -22(1) |
| F(1)  | 26(1)  | 19(1)  | 30(1)  | -12(1) | -6(1)  | 1(1)   |
| F(2)  | 44(1)  | 25(1)  | 36(1)  | -17(1) | -7(1)  | -9(1)  |
| F(3)  | 33(1)  | 41(1)  | 31(1)  | -15(1) | -6(1)  | -17(1) |
| F(4)  | 19(1)  | 42(1)  | 30(1)  | -13(1) | -2(1)  | -4(1)  |
| F(5)  | 21(1)  | 27(1)  | 34(1)  | -18(1) | 0(1)   | -1(1)  |
| F(6)  | 20(1)  | 27(1)  | 23(1)  | -2(1)  | 0(1)   | -1(1)  |
| F(7)  | 28(1)  | 31(1)  | 37(1)  | -4(1)  | -10(1) | 7(1)   |
| F(8)  | 51(1)  | 26(1)  | 38(1)  | 13(1)  | -14(1) | -2(1)  |
| F(9)  | 45(1)  | 34(1)  | 27(1)  | 10(1)  | 1(1)   | -19(1) |
| F(10) | 22(1)  | 28(1)  | 22(1)  | -2(1)  | 2(1)   | -10(1) |
| F(11) | 26(1)  | 23(1)  | 23(1)  | 0(1)   | -6(1)  | -7(1)  |
| F(12) | 22(1)  | 34(1)  | 46(1)  | -11(1) | -1(1)  | -10(1) |
| F(13) | 35(1)  | 40(1)  | 46(1)  | -4(1)  | 14(1)  | -22(1) |
| F(14) | 46(1)  | 35(1)  | 28(1)  | 11(1)  | 4(1)   | -16(1) |
| F(15) | 27(1)  | 23(1)  | 23(1)  | 3(1)   | -3(1)  | -6(1)  |
| F(16) | 40(1)  | 28(1)  | 27(1)  | -13(1) | 2(1)   | -16(1) |
| F(17) | 76(2)  | 45(1)  | 59(1)  | -43(1) | 16(1)  | -26(1) |

|       |       |       |       |        |       |        |
|-------|-------|-------|-------|--------|-------|--------|
| F(18) | 72(2) | 34(1) | 68(1) | -37(1) | 31(1) | -5(1)  |
| F(19) | 32(1) | 27(1) | 39(1) | -6(1)  | 13(1) | 6(1)   |
| F(20) | 23(1) | 28(1) | 26(1) | -13(1) | -1(1) | 2(1)   |
| N(1)  | 16(1) | 19(1) | 16(1) | -2(1)  | 1(1)  | -2(1)  |
| O(1)  | 19(1) | 13(1) | 13(1) | -5(1)  | 0(1)  | -2(1)  |
| O(2)  | 17(1) | 14(1) | 12(1) | -3(1)  | 1(1)  | -3(1)  |
| O(3)  | 31(1) | 21(1) | 12(1) | -5(1)  | 2(1)  | -14(1) |
| O(4)  | 27(1) | 22(1) | 13(1) | -6(1)  | 5(1)  | -12(1) |
| P(1)  | 16(1) | 12(1) | 12(1) | -4(1)  | 1(1)  | -2(1)  |
| Rh(1) | 19(1) | 13(1) | 13(1) | -5(1)  | 0(1)  | -2(1)  |

**Table 5.** Hydrogen coordinates ( $\times 10^4$ ) and isotropic displacement parameters ( $\text{\AA}^2 \times 10^3$ ) for Rovis106\_0m.

|        | x    | y    | z    | U(eq) |
|--------|------|------|------|-------|
| H(1)   | 3701 | 3640 | 5715 | 27    |
| H(2)   | 4909 | 4503 | 4795 | 35    |
| H(3)   | 3668 | 1216 | 4377 | 28    |
| H(4)   | 5101 | 1922 | 3575 | 31    |
| H(5A)  | 6420 | 1400 | 4930 | 43    |
| H(5B)  | 6824 | 2019 | 4021 | 43    |
| H(6A)  | 6725 | 2950 | 5083 | 52    |
| H(6B)  | 6474 | 3711 | 4150 | 52    |
| H(7A)  | 5377 | 1634 | 6019 | 36    |
| H(7B)  | 4164 | 1752 | 6498 | 36    |
| H(8A)  | 4585 | 365  | 5759 | 36    |
| H(8B)  | 3283 | 1077 | 5748 | 36    |
| H(10)  | 1339 | 3788 | 1556 | 18    |
| H(11)  | 3850 | 3244 | 1607 | 18    |
| H(14A) | 2901 | 2650 | -574 | 41    |
| H(14B) | 3917 | 2378 | 59   | 41    |
| H(14C) | 3835 | 3442 | -770 | 41    |
| H(15A) | 1186 | 5122 | -177 | 43    |
| H(15B) | 1265 | 4433 | -779 | 43    |

|        |       |      |      |    |
|--------|-------|------|------|----|
| H(15C) | 2143  | 5260 | -889 | 43 |
| H(28A) | 1508  | 2791 | 4774 | 33 |
| H(28B) | 806   | 1992 | 4564 | 33 |
| H(29A) | -702  | 2989 | 5121 | 38 |
| H(29B) | -176  | 4122 | 4780 | 38 |
| H(30A) | -1632 | 4524 | 3838 | 43 |
| H(30B) | -1335 | 3247 | 3837 | 43 |
| H(31A) | -276  | 4074 | 2691 | 30 |
| H(31B) | -15   | 4988 | 3042 | 30 |
| H(44A) | 10676 | 6974 | 3345 | 62 |
| H(44B) | 10177 | 6977 | 2532 | 62 |

---

—

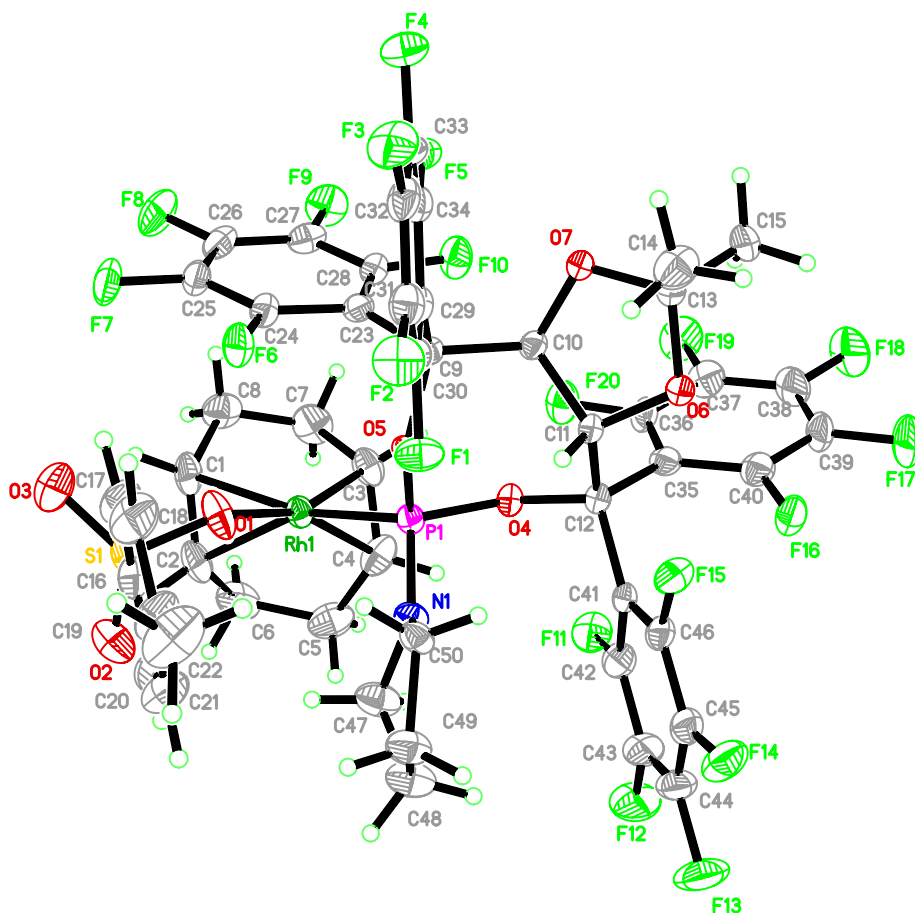

**Table 6.** Crystal data and structure refinement for Rh(cod)OTs · CKphos.

|                        |                                                                         |                        |
|------------------------|-------------------------------------------------------------------------|------------------------|
| Identification code    | Rovis117_0m                                                             |                        |
| Empirical formula      | C <sub>50</sub> H <sub>33</sub> F <sub>20</sub> N O <sub>7</sub> P Rh S |                        |
| Formula weight         | 1305.71                                                                 |                        |
| Temperature            | 120 K                                                                   |                        |
| Wavelength             | 0.71073 Å                                                               |                        |
| Crystal system         | Triclinic                                                               |                        |
| Space group            | <i>P</i> - 1                                                            |                        |
| Unit cell dimensions   | <i>a</i> = 11.7155(4) Å                                                 | $\alpha$ = 70.901(2)°. |
|                        | <i>b</i> = 12.1131(4) Å                                                 | $\beta$ = 89.025(2)°.  |
|                        | <i>c</i> = 18.2303(6) Å                                                 | $\gamma$ = 83.198(2)°. |
| Volume                 | 2426.82(14) Å <sup>3</sup>                                              |                        |
| Z                      | 2                                                                       |                        |
| Density (calculated)   | 1.787 Mg/m <sup>3</sup>                                                 |                        |
| Absorption coefficient | 0.561 mm <sup>-1</sup>                                                  |                        |
| F <sub>000</sub>       | 1304                                                                    |                        |

|                                   |                                             |
|-----------------------------------|---------------------------------------------|
| Crystal size                      | 0.29 x 0.13 x 0.07 mm <sup>3</sup>          |
| Theta range for data collection   | 1.75 to 26.52°.                             |
| Index ranges                      | -14≤h≤14, -15≤k≤15, -22≤l≤22                |
| Reflections collected             | 36213                                       |
| Independent reflections           | 9971 [R <sub>int</sub> = 0.0596]            |
| Completeness to theta = 26.52°    | 98.8 %                                      |
| Absorption correction             | Multi-scan                                  |
| Max. and min. transmission        | 0.9597 and 0.8538                           |
| Refinement method                 | Full-matrix least-squares on F <sup>2</sup> |
| Data / restraints / parameters    | 9971 / 0 / 733                              |
| Goodness-of-fit on F <sup>2</sup> | 1.059                                       |
| Final R indices [I>2sigma(I)]     | R1 = 0.0457, wR2 = 0.1109                   |
| R indices (all data)              | R1 = 0.0782, wR2 = 0.1451                   |
| Largest diff. peak and hole       | 0.740 and -1.029 e.Å <sup>-3</sup>          |

**Table 7.** Atomic coordinates ( x 10<sup>4</sup>) and equivalent isotropic displacement parameters (Å<sup>2</sup>x 10<sup>3</sup>)

for Rh(cod)OTs•CKphos. U(eq) is defined as one third of the trace of the orthogonalized U<sup>ij</sup> tensor.

|       | x        | y       | z       | U(eq) |
|-------|----------|---------|---------|-------|
| C(1)  | 9955(4)  | 8455(4) | 5518(3) | 32(1) |
| C(2)  | 9206(4)  | 8425(4) | 4954(3) | 33(1) |
| C(3)  | 9865(4)  | 6004(4) | 6177(2) | 29(1) |
| C(4)  | 8957(4)  | 6007(4) | 5686(3) | 33(1) |
| C(5)  | 8938(4)  | 6495(4) | 4805(3) | 41(1) |
| C(6)  | 9476(5)  | 7642(5) | 4471(3) | 42(1) |
| C(7)  | 11032(4) | 6404(4) | 5907(3) | 40(1) |
| C(8)  | 11091(4) | 7704(4) | 5751(3) | 36(1) |
| C(9)  | 7958(3)  | 6393(3) | 8449(2) | 18(1) |
| C(10) | 8051(3)  | 5016(3) | 8765(2) | 19(1) |
| C(11) | 6914(3)  | 4585(3) | 8627(2) | 19(1) |
| C(12) | 7028(3)  | 4175(3) | 7902(2) | 20(1) |
| C(13) | 7459(4)  | 3732(3) | 9927(2) | 24(1) |

|       |          |          |          |       |
|-------|----------|----------|----------|-------|
| C(14) | 6685(4)  | 4193(4)  | 10454(3) | 37(1) |
| C(15) | 8130(4)  | 2543(3)  | 10323(3) | 33(1) |
| C(16) | 5996(4)  | 10401(3) | 6383(2)  | 27(1) |
| C(17) | 6073(4)  | 10656(4) | 7070(3)  | 36(1) |
| C(18) | 5093(4)  | 10811(4) | 7467(3)  | 41(1) |
| C(19) | 4013(4)  | 10768(4) | 7181(3)  | 36(1) |
| C(20) | 3948(4)  | 10554(4) | 6485(3)  | 39(1) |
| C(21) | 4916(4)  | 10360(4) | 6090(3)  | 33(1) |
| C(22) | 2962(5)  | 10933(5) | 7623(3)  | 54(2) |
| C(23) | 9072(3)  | 6931(3)  | 8169(2)  | 21(1) |
| C(24) | 9007(4)  | 8167(3)  | 7898(2)  | 23(1) |
| C(25) | 9936(4)  | 8761(3)  | 7603(2)  | 27(1) |
| C(26) | 10979(4) | 8147(4)  | 7568(2)  | 28(1) |
| C(27) | 11093(4) | 6940(4)  | 7832(2)  | 27(1) |
| C(28) | 10152(4) | 6352(3)  | 8133(2)  | 24(1) |
| C(29) | 7445(3)  | 6876(3)  | 9080(2)  | 19(1) |
| C(30) | 6311(3)  | 7337(3)  | 9111(2)  | 22(1) |
| C(31) | 5911(4)  | 7751(4)  | 9702(2)  | 26(1) |
| C(32) | 6646(4)  | 7711(3)  | 10290(2) | 28(1) |
| C(33) | 7771(4)  | 7260(4)  | 10286(2) | 27(1) |
| C(34) | 8153(4)  | 6855(3)  | 9689(2)  | 23(1) |
| C(35) | 7766(4)  | 2964(3)  | 8133(2)  | 23(1) |
| C(36) | 8931(4)  | 2760(3)  | 8022(2)  | 26(1) |
| C(37) | 9546(4)  | 1659(4)  | 8316(3)  | 31(1) |
| C(38) | 9008(4)  | 709(4)   | 8741(3)  | 36(1) |
| C(39) | 7858(4)  | 868(4)   | 8856(3)  | 33(1) |
| C(40) | 7252(4)  | 1968(4)  | 8559(2)  | 28(1) |
| C(41) | 5900(4)  | 4088(3)  | 7514(2)  | 21(1) |
| C(42) | 5962(4)  | 3875(4)  | 6803(3)  | 28(1) |
| C(43) | 5001(4)  | 3757(4)  | 6423(3)  | 35(1) |
| C(44) | 3952(4)  | 3829(4)  | 6736(3)  | 35(1) |
| C(45) | 3852(4)  | 4014(4)  | 7441(3)  | 30(1) |
| C(46) | 4809(4)  | 4143(3)  | 7818(2)  | 24(1) |
| C(47) | 5788(4)  | 7086(4)  | 5831(2)  | 35(1) |
| C(48) | 4530(4)  | 7033(5)  | 5785(3)  | 41(1) |
| C(49) | 4034(4)  | 7417(4)  | 6430(3)  | 33(1) |

|       |          |          |          |       |
|-------|----------|----------|----------|-------|
| C(50) | 4991(3)  | 7160(4)  | 7043(2)  | 23(1) |
| F(1)  | 5517(2)  | 7395(2)  | 8573(1)  | 30(1) |
| F(2)  | 4813(2)  | 8215(2)  | 9687(1)  | 35(1) |
| F(3)  | 6264(2)  | 8131(2)  | 10856(1) | 37(1) |
| F(4)  | 8511(2)  | 7237(2)  | 10843(1) | 38(1) |
| F(5)  | 9269(2)  | 6428(2)  | 9719(1)  | 28(1) |
| F(6)  | 8016(2)  | 8811(2)  | 7939(1)  | 29(1) |
| F(7)  | 9812(2)  | 9940(2)  | 7358(2)  | 38(1) |
| F(8)  | 11884(2) | 8716(2)  | 7289(2)  | 42(1) |
| F(9)  | 12113(2) | 6333(2)  | 7806(2)  | 38(1) |
| F(10) | 10377(2) | 5175(2)  | 8406(2)  | 33(1) |
| F(11) | 6991(2)  | 3755(2)  | 6480(1)  | 36(1) |
| F(12) | 5119(3)  | 3567(3)  | 5737(2)  | 52(1) |
| F(13) | 3018(3)  | 3714(3)  | 6375(2)  | 55(1) |
| F(14) | 2821(2)  | 4058(2)  | 7768(2)  | 40(1) |
| F(15) | 4644(2)  | 4294(2)  | 8509(1)  | 28(1) |
| F(16) | 6125(2)  | 2043(2)  | 8712(1)  | 31(1) |
| F(17) | 7315(3)  | -46(2)   | 9265(2)  | 46(1) |
| F(18) | 9611(3)  | -360(2)  | 9034(2)  | 49(1) |
| F(19) | 10677(2) | 1518(2)  | 8181(2)  | 44(1) |
| F(20) | 9548(2)  | 3624(2)  | 7621(2)  | 34(1) |
| N(1)  | 6022(3)  | 6783(3)  | 6670(2)  | 22(1) |
| O(1)  | 7647(3)  | 8838(2)  | 6361(2)  | 35(1) |
| O(2)  | 6922(3)  | 10208(3) | 5127(2)  | 41(1) |
| O(3)  | 8068(3)  | 10843(3) | 5986(2)  | 44(1) |
| O(4)  | 7644(2)  | 5019(2)  | 7334(2)  | 20(1) |
| O(5)  | 7160(2)  | 6791(2)  | 7790(1)  | 18(1) |
| O(6)  | 6794(2)  | 3630(2)  | 9305(2)  | 23(1) |
| O(7)  | 8242(2)  | 4566(2)  | 9576(2)  | 25(1) |
| P(1)  | 7347(1)  | 6446(1)  | 7004(1)  | 19(1) |
| Rh(1) | 8577(1)  | 7393(1)  | 6135(1)  | 22(1) |
| S(1)  | 7254(1)  | 10085(1) | 5906(1)  | 29(1) |

---

**Table 8.** Bond lengths [ $\text{\AA}$ ] and angles [ $^\circ$ ] for Rh(cod)OTs•CKphos.

---

|             |          |             |          |
|-------------|----------|-------------|----------|
| C(1)-C(2)   | 1.376(6) | C(23)-C(24) | 1.407(5) |
| C(1)-C(8)   | 1.503(6) | C(24)-F(6)  | 1.335(5) |
| C(1)-Rh(1)  | 2.239(4) | C(24)-C(25) | 1.380(6) |
| C(2)-C(6)   | 1.496(6) | C(25)-F(7)  | 1.340(5) |
| C(2)-Rh(1)  | 2.269(4) | C(25)-C(26) | 1.365(6) |
| C(3)-C(4)   | 1.401(6) | C(26)-F(8)  | 1.335(5) |
| C(3)-C(7)   | 1.525(6) | C(26)-C(27) | 1.372(6) |
| C(3)-Rh(1)  | 2.105(4) | C(27)-F(9)  | 1.335(5) |
| C(4)-C(5)   | 1.517(6) | C(27)-C(28) | 1.391(6) |
| C(4)-Rh(1)  | 2.098(4) | C(28)-F(10) | 1.342(4) |
| C(5)-C(6)   | 1.529(7) | C(29)-C(30) | 1.387(6) |
| C(7)-C(8)   | 1.515(7) | C(29)-C(34) | 1.390(6) |
| C(9)-O(5)   | 1.449(4) | C(30)-F(1)  | 1.342(4) |
| C(9)-C(23)  | 1.534(5) | C(30)-C(31) | 1.383(6) |
| C(9)-C(29)  | 1.535(5) | C(31)-F(2)  | 1.338(5) |
| C(9)-C(10)  | 1.567(5) | C(31)-C(32) | 1.372(6) |
| C(10)-O(7)  | 1.410(4) | C(32)-F(3)  | 1.341(5) |
| C(10)-C(11) | 1.541(5) | C(32)-C(33) | 1.367(6) |
| C(11)-O(6)  | 1.409(4) | C(33)-F(4)  | 1.338(5) |
| C(11)-C(12) | 1.556(5) | C(33)-C(34) | 1.379(6) |
| C(12)-O(4)  | 1.447(4) | C(34)-F(5)  | 1.343(5) |
| C(12)-C(41) | 1.540(5) | C(35)-C(36) | 1.380(6) |
| C(12)-C(35) | 1.545(5) | C(35)-C(40) | 1.402(6) |
| C(13)-O(7)  | 1.431(5) | C(36)-F(20) | 1.346(4) |
| C(13)-O(6)  | 1.433(5) | C(36)-C(37) | 1.380(6) |
| C(13)-C(14) | 1.503(6) | C(37)-F(19) | 1.345(5) |
| C(13)-C(15) | 1.512(6) | C(37)-C(38) | 1.376(6) |
| C(16)-C(17) | 1.390(6) | C(38)-F(18) | 1.344(5) |
| C(16)-C(21) | 1.394(6) | C(38)-C(39) | 1.360(7) |
| C(16)-S(1)  | 1.765(4) | C(39)-F(17) | 1.340(5) |
| C(17)-C(18) | 1.374(7) | C(39)-C(40) | 1.375(6) |
| C(18)-C(19) | 1.390(7) | C(40)-F(16) | 1.343(5) |
| C(19)-C(20) | 1.381(7) | C(41)-C(46) | 1.387(6) |
| C(19)-C(22) | 1.490(7) | C(41)-C(42) | 1.401(6) |
| C(20)-C(21) | 1.370(7) | C(42)-F(11) | 1.347(5) |
| C(23)-C(28) | 1.384(6) | C(42)-C(43) | 1.377(6) |



|                 |            |                   |          |
|-----------------|------------|-------------------|----------|
| C(43)-F(12)     | 1.345(5)   | C(1)-C(8)-C(7)    | 113.9(4) |
| C(43)-C(44)     | 1.351(7)   | O(5)-C(9)-C(23)   | 106.8(3) |
| C(44)-F(13)     | 1.332(5)   | O(5)-C(9)-C(29)   | 108.1(3) |
| C(44)-C(45)     | 1.376(6)   | C(23)-C(9)-C(29)  | 109.1(3) |
| C(45)-F(14)     | 1.340(5)   | O(5)-C(9)-C(10)   | 107.2(3) |
| C(45)-C(46)     | 1.376(6)   | C(23)-C(9)-C(10)  | 116.5(3) |
| C(46)-F(15)     | 1.339(5)   | C(29)-C(9)-C(10)  | 108.8(3) |
| C(47)-N(1)      | 1.474(5)   | O(7)-C(10)-C(11)  | 104.9(3) |
| C(47)-C(48)     | 1.487(6)   | O(7)-C(10)-C(9)   | 112.0(3) |
| C(48)-C(49)     | 1.485(6)   | C(11)-C(10)-C(9)  | 110.9(3) |
| C(49)-C(50)     | 1.529(6)   | O(6)-C(11)-C(10)  | 104.0(3) |
| C(50)-N(1)      | 1.475(5)   | O(6)-C(11)-C(12)  | 110.9(3) |
| N(1)-P(1)       | 1.632(3)   | C(10)-C(11)-C(12) | 109.0(3) |
| O(1)-S(1)       | 1.487(3)   | O(4)-C(12)-C(41)  | 107.9(3) |
| O(1)-Rh(1)      | 2.104(3)   | O(4)-C(12)-C(35)  | 108.4(3) |
| O(2)-S(1)       | 1.434(3)   | C(41)-C(12)-C(35) | 108.7(3) |
| O(3)-S(1)       | 1.441(3)   | O(4)-C(12)-C(11)  | 106.4(3) |
| O(4)-P(1)       | 1.629(3)   | C(41)-C(12)-C(11) | 116.6(3) |
| O(5)-P(1)       | 1.624(3)   | C(35)-C(12)-C(11) | 108.4(3) |
| P(1)-Rh(1)      | 2.2421(10) | O(7)-C(13)-O(6)   | 106.4(3) |
|                 |            | O(7)-C(13)-C(14)  | 109.1(3) |
| C(2)-C(1)-C(8)  | 125.9(4)   | O(6)-C(13)-C(14)  | 109.9(4) |
| C(2)-C(1)-Rh(1) | 73.4(2)    | O(7)-C(13)-C(15)  | 109.3(4) |
| C(8)-C(1)-Rh(1) | 107.8(3)   | O(6)-C(13)-C(15)  | 107.4(3) |
| C(1)-C(2)-C(6)  | 122.1(4)   | C(14)-C(13)-C(15) | 114.4(4) |
| C(1)-C(2)-Rh(1) | 71.0(2)    | C(17)-C(16)-C(21) | 119.3(4) |
| C(6)-C(2)-Rh(1) | 110.6(3)   | C(17)-C(16)-S(1)  | 120.3(3) |
| C(4)-C(3)-C(7)  | 125.0(4)   | C(21)-C(16)-S(1)  | 120.4(3) |
| C(4)-C(3)-Rh(1) | 70.3(3)    | C(18)-C(17)-C(16) | 119.7(4) |
| C(7)-C(3)-Rh(1) | 113.8(3)   | C(17)-C(18)-C(19) | 121.4(5) |
| C(3)-C(4)-C(5)  | 125.8(4)   | C(20)-C(19)-C(18) | 118.1(5) |
| C(3)-C(4)-Rh(1) | 70.8(2)    | C(20)-C(19)-C(22) | 121.4(4) |
| C(5)-C(4)-Rh(1) | 109.5(3)   | C(18)-C(19)-C(22) | 120.5(5) |
| C(4)-C(5)-C(6)  | 114.5(4)   | C(21)-C(20)-C(19) | 121.6(4) |
| C(2)-C(6)-C(5)  | 111.1(4)   | C(20)-C(21)-C(16) | 119.9(4) |
| C(8)-C(7)-C(3)  | 114.3(4)   | C(28)-C(23)-C(24) | 114.7(4) |

|                   |          |                   |          |
|-------------------|----------|-------------------|----------|
| C(28)-C(23)-C(9)  | 128.0(3) | C(36)-C(35)-C(12) | 126.4(4) |
| C(24)-C(23)-C(9)  | 117.2(4) | C(40)-C(35)-C(12) | 118.3(4) |
| F(6)-C(24)-C(25)  | 117.4(3) | F(20)-C(36)-C(37) | 115.2(4) |
| F(6)-C(24)-C(23)  | 119.5(3) | F(20)-C(36)-C(35) | 122.3(4) |
| C(25)-C(24)-C(23) | 123.0(4) | C(37)-C(36)-C(35) | 122.5(4) |
| F(7)-C(25)-C(26)  | 120.3(4) | F(19)-C(37)-C(38) | 120.1(4) |
| F(7)-C(25)-C(24)  | 119.8(4) | F(19)-C(37)-C(36) | 119.5(4) |
| C(26)-C(25)-C(24) | 120.0(4) | C(38)-C(37)-C(36) | 120.4(4) |
| F(8)-C(26)-C(25)  | 120.3(4) | F(18)-C(38)-C(39) | 120.6(4) |
| F(8)-C(26)-C(27)  | 120.3(4) | F(18)-C(38)-C(37) | 120.3(5) |
| C(25)-C(26)-C(27) | 119.4(4) | C(39)-C(38)-C(37) | 119.1(4) |
| F(9)-C(27)-C(26)  | 119.8(4) | F(17)-C(39)-C(38) | 120.1(4) |
| F(9)-C(27)-C(28)  | 120.1(4) | F(17)-C(39)-C(40) | 119.8(4) |
| C(26)-C(27)-C(28) | 120.1(4) | C(38)-C(39)-C(40) | 120.1(4) |
| F(10)-C(28)-C(23) | 122.3(3) | F(16)-C(40)-C(39) | 115.9(4) |
| F(10)-C(28)-C(27) | 114.8(4) | F(16)-C(40)-C(35) | 121.3(4) |
| C(23)-C(28)-C(27) | 122.8(4) | C(39)-C(40)-C(35) | 122.8(4) |
| C(30)-C(29)-C(34) | 115.1(4) | C(46)-C(41)-C(42) | 115.4(4) |
| C(30)-C(29)-C(9)  | 126.0(3) | C(46)-C(41)-C(12) | 126.3(4) |
| C(34)-C(29)-C(9)  | 118.9(4) | C(42)-C(41)-C(12) | 118.2(4) |
| F(1)-C(30)-C(31)  | 115.2(4) | F(11)-C(42)-C(43) | 118.0(4) |
| F(1)-C(30)-C(29)  | 122.2(4) | F(11)-C(42)-C(41) | 119.7(4) |
| C(31)-C(30)-C(29) | 122.6(4) | C(43)-C(42)-C(41) | 122.3(4) |
| F(2)-C(31)-C(32)  | 120.2(4) | F(12)-C(43)-C(44) | 120.4(4) |
| F(2)-C(31)-C(30)  | 119.8(4) | F(12)-C(43)-C(42) | 119.2(5) |
| C(32)-C(31)-C(30) | 120.0(4) | C(44)-C(43)-C(42) | 120.4(4) |
| F(3)-C(32)-C(33)  | 120.5(4) | F(13)-C(44)-C(43) | 120.9(4) |
| F(3)-C(32)-C(31)  | 120.0(4) | F(13)-C(44)-C(45) | 119.6(5) |
| C(33)-C(32)-C(31) | 119.4(4) | C(43)-C(44)-C(45) | 119.4(4) |
| F(4)-C(33)-C(32)  | 120.5(4) | F(14)-C(45)-C(46) | 119.6(4) |
| F(4)-C(33)-C(34)  | 119.8(4) | F(14)-C(45)-C(44) | 120.1(4) |
| C(32)-C(33)-C(34) | 119.7(4) | C(46)-C(45)-C(44) | 120.3(4) |
| F(5)-C(34)-C(33)  | 116.5(4) | F(15)-C(46)-C(45) | 116.6(4) |
| F(5)-C(34)-C(29)  | 120.2(4) | F(15)-C(46)-C(41) | 121.1(3) |
| C(33)-C(34)-C(29) | 123.2(4) | C(45)-C(46)-C(41) | 122.2(4) |
| C(36)-C(35)-C(40) | 115.1(4) | N(1)-C(47)-C(48)  | 103.4(4) |

|                   |            |                 |            |
|-------------------|------------|-----------------|------------|
| C(49)-C(48)-C(47) | 105.4(4)   | C(4)-Rh(1)-C(1) | 96.45(17)  |
| C(48)-C(49)-C(50) | 106.9(4)   | O(1)-Rh(1)-C(1) | 92.95(15)  |
| N(1)-C(50)-C(49)  | 104.0(3)   | C(3)-Rh(1)-C(1) | 81.22(16)  |
| C(47)-N(1)-C(50)  | 109.5(3)   | C(4)-Rh(1)-P(1) | 93.91(12)  |
| C(47)-N(1)-P(1)   | 119.7(3)   | O(1)-Rh(1)-P(1) | 80.50(8)   |
| C(50)-N(1)-P(1)   | 128.5(3)   | C(3)-Rh(1)-P(1) | 101.05(12) |
| S(1)-O(1)-Rh(1)   | 136.05(19) | C(1)-Rh(1)-P(1) | 165.74(13) |
| C(12)-O(4)-P(1)   | 128.1(2)   | C(4)-Rh(1)-C(2) | 81.08(17)  |
| C(9)-O(5)-P(1)    | 124.5(2)   | O(1)-Rh(1)-C(2) | 96.39(14)  |
| C(11)-O(6)-C(13)  | 109.5(3)   | C(3)-Rh(1)-C(2) | 89.00(16)  |
| C(10)-O(7)-C(13)  | 110.3(3)   | C(1)-Rh(1)-C(2) | 35.55(16)  |
| O(5)-P(1)-O(4)    | 103.02(14) | P(1)-Rh(1)-C(2) | 157.25(13) |
| O(5)-P(1)-N(1)    | 98.25(16)  | O(2)-S(1)-O(3)  | 116.2(2)   |
| O(4)-P(1)-N(1)    | 109.15(16) | O(2)-S(1)-O(1)  | 111.50(19) |
| O(5)-P(1)-Rh(1)   | 117.86(10) | O(3)-S(1)-O(1)  | 110.6(2)   |
| O(4)-P(1)-Rh(1)   | 115.15(11) | O(2)-S(1)-C(16) | 107.4(2)   |
| N(1)-P(1)-Rh(1)   | 111.79(12) | O(3)-S(1)-C(16) | 107.2(2)   |
| C(4)-Rh(1)-O(1)   | 159.38(16) | O(1)-S(1)-C(16) | 102.97(18) |
| C(4)-Rh(1)-C(3)   | 38.94(17)  |                 |            |
| O(1)-Rh(1)-C(3)   | 161.58(15) |                 |            |

---

Symmetry transformations used to generate equivalent atoms:

**Table 9.** Anisotropic displacement parameters ( $\text{\AA}^2 \times 10^3$ ) for Rh(cod)OTs•CKphos. The anisotropic displacement factor exponent takes the form:  $-2p^2 [ h^2 a^* 2U^{11} + \dots + 2 h k a^* b^* U^{12} ]$

|      | U <sup>11</sup> | U <sup>22</sup> | U <sup>33</sup> | U <sup>23</sup> | U <sup>13</sup> | U <sup>12</sup> |
|------|-----------------|-----------------|-----------------|-----------------|-----------------|-----------------|
| C(1) | 28(2)           | 24(2)           | 36(3)           | 0(2)            | 13(2)           | -9(2)           |
| C(2) | 34(3)           | 27(2)           | 27(2)           | 4(2)            | 9(2)            | -1(2)           |
| C(3) | 31(3)           | 25(2)           | 26(2)           | -4(2)           | 6(2)            | 3(2)            |
| C(4) | 31(3)           | 34(3)           | 43(3)           | -23(2)          | 12(2)           | -10(2)          |
| C(5) | 41(3)           | 55(3)           | 39(3)           | -30(3)          | 1(2)            | -7(3)           |
| C(6) | 45(3)           | 57(3)           | 21(2)           | -9(2)           | 7(2)            | -7(3)           |
| C(7) | 24(3)           | 45(3)           | 45(3)           | -9(2)           | 5(2)            | -1(2)           |

|       |       |       |       |        |        |        |
|-------|-------|-------|-------|--------|--------|--------|
| C(8)  | 25(2) | 48(3) | 35(3) | -13(2) | 4(2)   | -10(2) |
| C(9)  | 17(2) | 16(2) | 21(2) | -5(2)  | -2(2)  | -3(2)  |
| C(10) | 20(2) | 15(2) | 22(2) | -7(2)  | -2(2)  | -2(2)  |
| C(11) | 22(2) | 14(2) | 21(2) | -3(2)  | -2(2)  | -5(2)  |
| C(12) | 21(2) | 18(2) | 21(2) | -5(2)  | 0(2)   | -6(2)  |
| C(13) | 31(2) | 21(2) | 20(2) | -4(2)  | -2(2)  | -9(2)  |
| C(14) | 39(3) | 45(3) | 35(3) | -21(2) | 8(2)   | -13(2) |
| C(15) | 45(3) | 19(2) | 30(3) | 1(2)   | -10(2) | -7(2)  |
| C(16) | 33(3) | 18(2) | 30(2) | -7(2)  | 4(2)   | -3(2)  |
| C(17) | 30(3) | 30(2) | 53(3) | -21(2) | -1(2)  | -4(2)  |
| C(18) | 46(3) | 37(3) | 50(3) | -30(2) | 4(3)   | -2(2)  |
| C(19) | 35(3) | 34(3) | 50(3) | -26(2) | 8(2)   | -10(2) |
| C(20) | 32(3) | 43(3) | 51(3) | -23(2) | -2(2)  | -10(2) |
| C(21) | 36(3) | 32(2) | 34(3) | -15(2) | 3(2)   | -7(2)  |
| C(22) | 40(3) | 63(4) | 74(4) | -43(3) | 16(3)  | -14(3) |
| C(23) | 21(2) | 23(2) | 20(2) | -7(2)  | -1(2)  | -6(2)  |
| C(24) | 26(2) | 19(2) | 25(2) | -8(2)  | 2(2)   | -5(2)  |
| C(25) | 35(3) | 21(2) | 26(2) | -6(2)  | 1(2)   | -10(2) |
| C(26) | 31(3) | 33(2) | 27(2) | -15(2) | 5(2)   | -16(2) |
| C(27) | 24(2) | 37(3) | 26(2) | -16(2) | 2(2)   | -7(2)  |
| C(28) | 27(2) | 19(2) | 28(2) | -7(2)  | -3(2)  | -6(2)  |
| C(29) | 24(2) | 12(2) | 22(2) | -6(2)  | 4(2)   | -4(2)  |
| C(30) | 23(2) | 21(2) | 21(2) | -5(2)  | 0(2)   | -5(2)  |
| C(31) | 28(2) | 24(2) | 26(2) | -8(2)  | 8(2)   | -6(2)  |
| C(32) | 41(3) | 19(2) | 28(2) | -13(2) | 8(2)   | -9(2)  |
| C(33) | 36(3) | 26(2) | 20(2) | -9(2)  | -5(2)  | -9(2)  |
| C(34) | 23(2) | 17(2) | 28(2) | -7(2)  | 1(2)   | -2(2)  |
| C(35) | 26(2) | 19(2) | 24(2) | -9(2)  | -5(2)  | 0(2)   |
| C(36) | 33(3) | 17(2) | 30(2) | -10(2) | 1(2)   | -7(2)  |
| C(37) | 30(3) | 26(2) | 41(3) | -18(2) | 0(2)   | 4(2)   |
| C(38) | 49(3) | 19(2) | 39(3) | -9(2)  | -7(2)  | 4(2)   |
| C(39) | 47(3) | 17(2) | 34(3) | -6(2)  | -1(2)  | -9(2)  |
| C(40) | 31(3) | 24(2) | 30(2) | -13(2) | -2(2)  | -3(2)  |
| C(41) | 27(2) | 12(2) | 24(2) | -4(2)  | -4(2)  | -5(2)  |
| C(42) | 34(3) | 24(2) | 30(2) | -12(2) | -1(2)  | -4(2)  |
| C(43) | 52(3) | 32(2) | 29(3) | -19(2) | -11(2) | -5(2)  |

|       |       |       |       |        |        |        |
|-------|-------|-------|-------|--------|--------|--------|
| C(44) | 38(3) | 29(2) | 41(3) | -14(2) | -18(2) | -1(2)  |
| C(45) | 28(3) | 19(2) | 41(3) | -6(2)  | -5(2)  | -2(2)  |
| C(46) | 27(2) | 15(2) | 30(2) | -7(2)  | -3(2)  | -3(2)  |
| C(47) | 31(3) | 49(3) | 24(2) | -10(2) | -2(2)  | -1(2)  |
| C(48) | 31(3) | 52(3) | 36(3) | -14(2) | -7(2)  | 3(2)   |
| C(49) | 25(2) | 44(3) | 28(2) | -9(2)  | -2(2)  | -2(2)  |
| C(50) | 16(2) | 25(2) | 23(2) | -2(2)  | 0(2)   | 2(2)   |
| F(1)  | 21(1) | 44(2) | 28(1) | -17(1) | -1(1)  | -1(1)  |
| F(2)  | 31(2) | 41(2) | 37(2) | -19(1) | 9(1)   | 2(1)   |
| F(3)  | 48(2) | 40(2) | 33(2) | -25(1) | 7(1)   | -5(1)  |
| F(4)  | 45(2) | 43(2) | 31(1) | -19(1) | -7(1)  | -9(1)  |
| F(5)  | 26(1) | 32(1) | 29(1) | -12(1) | -5(1)  | -5(1)  |
| F(6)  | 31(1) | 18(1) | 37(1) | -8(1)  | 5(1)   | -2(1)  |
| F(7)  | 51(2) | 22(1) | 44(2) | -9(1)  | 7(1)   | -17(1) |
| F(8)  | 37(2) | 46(2) | 52(2) | -22(1) | 17(1)  | -27(1) |
| F(9)  | 21(1) | 44(2) | 49(2) | -17(1) | 5(1)   | 0(1)   |
| F(10) | 23(1) | 22(1) | 50(2) | -8(1)  | 2(1)   | 1(1)   |
| F(11) | 46(2) | 39(2) | 29(1) | -19(1) | 6(1)   | -8(1)  |
| F(12) | 72(2) | 57(2) | 38(2) | -28(2) | -15(2) | -8(2)  |
| F(13) | 48(2) | 57(2) | 69(2) | -30(2) | -30(2) | -5(2)  |
| F(14) | 24(1) | 38(2) | 63(2) | -21(1) | -5(1)  | -6(1)  |
| F(15) | 26(1) | 35(1) | 29(1) | -15(1) | 3(1)   | -10(1) |
| F(16) | 30(1) | 23(1) | 39(2) | -9(1)  | 3(1)   | -9(1)  |
| F(17) | 57(2) | 19(1) | 58(2) | -4(1)  | 6(2)   | -9(1)  |
| F(18) | 56(2) | 19(1) | 63(2) | -9(1)  | -5(2)  | 15(1)  |
| F(19) | 33(2) | 37(2) | 64(2) | -22(1) | 1(1)   | 7(1)   |
| F(20) | 29(1) | 25(1) | 47(2) | -10(1) | 7(1)   | -1(1)  |
| N(1)  | 21(2) | 26(2) | 19(2) | -6(2)  | 0(1)   | -1(2)  |
| O(1)  | 46(2) | 21(2) | 30(2) | 0(1)   | 8(2)   | 7(1)   |
| O(2)  | 47(2) | 38(2) | 30(2) | -4(2)  | -1(2)  | 4(2)   |
| O(3)  | 42(2) | 41(2) | 54(2) | -16(2) | 8(2)   | -18(2) |
| O(4)  | 22(2) | 16(1) | 22(2) | -6(1)  | 3(1)   | -4(1)  |
| O(5)  | 18(1) | 16(1) | 18(1) | -4(1)  | -3(1)  | 1(1)   |
| O(6)  | 28(2) | 21(1) | 19(2) | -4(1)  | -2(1)  | -9(1)  |
| O(7)  | 32(2) | 20(1) | 22(2) | -2(1)  | -6(1)  | -10(1) |
| P(1)  | 19(1) | 18(1) | 19(1) | -5(1)  | 1(1)   | -2(1)  |

|       |       |       |       |       |      |       |
|-------|-------|-------|-------|-------|------|-------|
| Rh(1) | 21(1) | 20(1) | 22(1) | -4(1) | 2(1) | -3(1) |
| S(1)  | 31(1) | 20(1) | 30(1) | -1(1) | 3(1) | -1(1) |

---

**Table 10.** Hydrogen coordinates ( $\times 10^4$ ) and isotropic displacement parameters ( $\text{\AA}^2 \times 10^3$ ) for Rh(cod)OTs $\cdot$ CKphos.

|        | x     | y     | z     | U(eq) |
|--------|-------|-------|-------|-------|
| H(1)   | 9925  | 9226  | 5587  | 38    |
| H(2)   | 8736  | 9173  | 4690  | 39    |
| H(3)   | 9905  | 5355  | 6671  | 35    |
| H(4)   | 8493  | 5357  | 5898  | 40    |
| H(5A)  | 8147  | 6629  | 4619  | 50    |
| H(5B)  | 9344  | 5908  | 4609  | 50    |
| H(6A)  | 10303 | 7465  | 4452  | 50    |
| H(6B)  | 9185  | 8048  | 3945  | 50    |
| H(7A)  | 11610 | 5957  | 6301  | 48    |
| H(7B)  | 11222 | 6222  | 5436  | 48    |
| H(8A)  | 11383 | 7810  | 6216  | 43    |
| H(8B)  | 11634 | 7973  | 5342  | 43    |
| H(10)  | 8676  | 4685  | 8507  | 22    |
| H(11)  | 6269  | 5207  | 8559  | 23    |
| H(14A) | 6204  | 4885  | 10151 | 56    |
| H(14B) | 7144  | 4387  | 10816 | 56    |
| H(14C) | 6214  | 3603  | 10733 | 56    |
| H(15A) | 7607  | 1970  | 10527 | 50    |
| H(15B) | 8595  | 2586  | 10739 | 50    |
| H(15C) | 8616  | 2318  | 9954  | 50    |
| H(17)  | 6785  | 10721 | 7259  | 43    |
| H(18)  | 5154  | 10947 | 7937  | 49    |
| H(20)  | 3231  | 10541 | 6279  | 47    |
| H(21)  | 4852  | 10201 | 5628  | 40    |
| H(22A) | 2293  | 11066 | 7295  | 80    |
| H(22B) | 2994  | 11599 | 7794  | 80    |
| H(22C) | 2922  | 10241 | 8066  | 80    |
| H(47A) | 6219  | 6524  | 5624  | 42    |
| H(47B) | 5979  | 7869  | 5548  | 42    |
| H(48A) | 4207  | 7554  | 5289  | 49    |

|        |      |      |      |    |
|--------|------|------|------|----|
| H(48B) | 4376 | 6238 | 5848 | 49 |
| H(49A) | 3392 | 6988 | 6648 | 40 |
| H(49B) | 3762 | 8251 | 6243 | 40 |
| H(50A) | 5090 | 7859 | 7172 | 27 |
| H(50B) | 4825 | 6541 | 7512 | 27 |

---



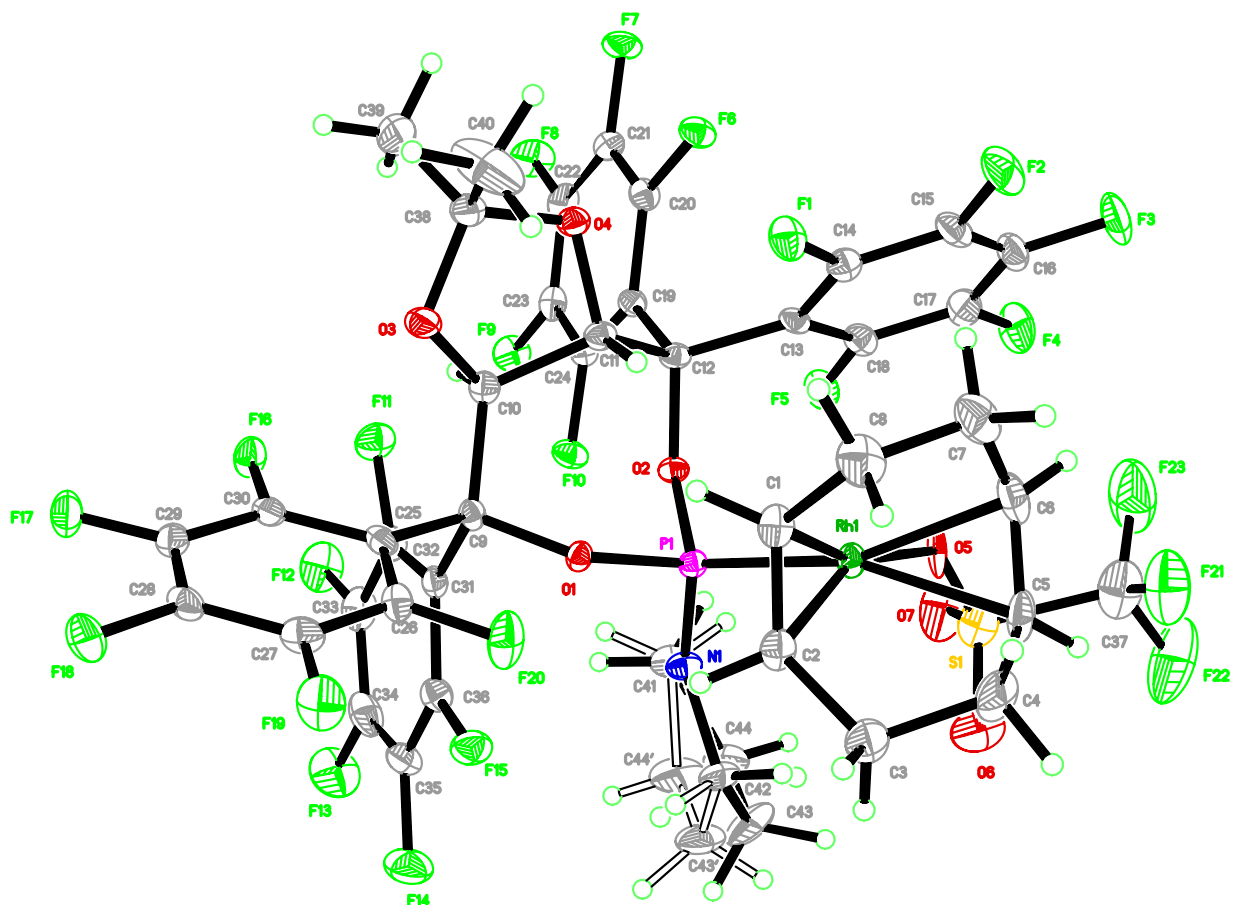

**Table 11.** Crystal data and structure refinement for Rh(cod)OTf·CKphos.

|                        |                                                                         |                        |
|------------------------|-------------------------------------------------------------------------|------------------------|
| Identification code    | Rovis107                                                                |                        |
| Empirical formula      | C <sub>44</sub> H <sub>28</sub> F <sub>23</sub> N O <sub>7</sub> P Rh S |                        |
| Formula weight         | 1285.61                                                                 |                        |
| Temperature            | 120(2) K                                                                |                        |
| Wavelength             | 0.71073 Å                                                               |                        |
| Crystal system         | Triclinic                                                               |                        |
| Space group            | P-1                                                                     |                        |
| Unit cell dimensions   | <i>a</i> = 10.4903(10) Å                                                | $\alpha$ = 78.012(3)°. |
|                        | <i>b</i> = 14.3946(14) Å                                                | $\beta$ = 84.045(3)°.  |
|                        | <i>c</i> = 15.5781(15) Å                                                | $\gamma$ = 72.010(4)°. |
| Volume                 | 2186.6(4) Å <sup>3</sup>                                                |                        |
| Z                      | 2                                                                       |                        |
| Density (calculated)   | 1.953 Mg/m <sup>3</sup>                                                 |                        |
| Absorption coefficient | 0.630 mm <sup>-1</sup>                                                  |                        |
| F <sub>000</sub>       | 1276                                                                    |                        |

|                                   |                                             |
|-----------------------------------|---------------------------------------------|
| Crystal size                      | 0.23 x 0.06 x 0.06 mm <sup>3</sup>          |
| Theta range for data collection   | 1.82 to 27.10°.                             |
| Index ranges                      | -13≤h≤13, -17≤k≤18, -19≤l≤19                |
| Reflections collected             | 40057                                       |
| Independent reflections           | 9632 [R <sub>int</sub> = 0.0482]            |
| Completeness to theta = 27.10°    | 99.9 %                                      |
| Absorption correction             | Multi-scan                                  |
| Max. and min. transmission        | 0.9626 and 0.8687                           |
| Refinement method                 | Full-matrix least-squares on F <sup>2</sup> |
| Data / restraints / parameters    | 9632 / 43 / 725                             |
| Goodness-of-fit on F <sup>2</sup> | 1.124                                       |
| Final R indices [I>2sigma(I)]     | R1 = 0.0453, wR2 = 0.1260                   |
| R indices (all data)              | R1 = 0.0687, wR2 = 0.1592                   |
| Largest diff. peak and hole       | 0.851 and -1.335 e.Å <sup>-3</sup>          |

**Table 12.** Atomic coordinates ( x 10<sup>4</sup>) and equivalent isotropic displacement parameters (Å<sup>2</sup>x 10<sup>3</sup>)

for Rh(cod)OTf•CKphos. U(eq) is defined as one third of the trace of the orthogonalized U<sup>ij</sup> tensor.

|       | x       | y       | z       | U(eq) |
|-------|---------|---------|---------|-------|
| C(1)  | 5764(4) | 5050(3) | 7868(3) | 18(1) |
| C(2)  | 4816(4) | 5209(3) | 7231(3) | 19(1) |
| C(3)  | 4769(5) | 4485(3) | 6663(3) | 28(1) |
| C(4)  | 6143(5) | 3908(3) | 6330(3) | 30(1) |
| C(5)  | 7091(5) | 4542(3) | 6092(3) | 25(1) |
| C(6)  | 7983(4) | 4555(3) | 6655(3) | 25(1) |
| C(7)  | 8166(5) | 3970(3) | 7597(3) | 30(1) |
| C(8)  | 6850(5) | 4068(3) | 8136(3) | 29(1) |
| C(9)  | 3468(4) | 7979(3) | 8467(2) | 13(1) |
| C(10) | 4657(4) | 8066(3) | 8935(2) | 14(1) |
| C(11) | 6086(4) | 7476(3) | 8664(2) | 14(1) |
| C(12) | 6672(4) | 7965(3) | 7810(2) | 13(1) |
| C(13) | 8014(4) | 7311(3) | 7454(3) | 14(1) |

|        |          |          |          |       |
|--------|----------|----------|----------|-------|
| C(14)  | 8764(4)  | 6368(3)  | 7861(3)  | 17(1) |
| C(15)  | 9997(4)  | 5879(3)  | 7511(3)  | 21(1) |
| C(16)  | 10511(4) | 6314(3)  | 6741(3)  | 23(1) |
| C(17)  | 9789(4)  | 7240(3)  | 6310(3)  | 23(1) |
| C(18)  | 8569(4)  | 7712(3)  | 6670(3)  | 18(1) |
| C(19)  | 6879(4)  | 8954(3)  | 7897(2)  | 13(1) |
| C(20)  | 7976(4)  | 8942(3)  | 8352(3)  | 16(1) |
| C(21)  | 8224(4)  | 9793(3)  | 8470(3)  | 17(1) |
| C(22)  | 7384(4)  | 10710(3) | 8112(3)  | 18(1) |
| C(23)  | 6322(4)  | 10758(3) | 7642(2)  | 16(1) |
| C(24)  | 6068(4)  | 9901(3)  | 7545(2)  | 13(1) |
| C(25)  | 2480(4)  | 7575(3)  | 9137(3)  | 15(1) |
| C(26)  | 2124(4)  | 6716(3)  | 9156(3)  | 17(1) |
| C(27)  | 1138(4)  | 6464(3)  | 9723(3)  | 19(1) |
| C(28)  | 455(4)   | 7074(3)  | 10309(3) | 17(1) |
| C(29)  | 782(4)   | 7920(3)  | 10319(3) | 18(1) |
| C(30)  | 1780(4)  | 8156(3)  | 9743(2)  | 15(1) |
| C(31)  | 2573(4)  | 8971(3)  | 7936(2)  | 15(1) |
| C(32)  | 2514(4)  | 9929(3)  | 7983(3)  | 21(1) |
| C(33)  | 1618(5)  | 10765(3) | 7507(3)  | 24(1) |
| C(34)  | 727(5)   | 10646(3) | 6985(3)  | 26(1) |
| C(35)  | 726(4)   | 9703(3)  | 6946(3)  | 23(1) |
| C(36)  | 1611(4)  | 8902(3)  | 7418(3)  | 17(1) |
| C(37)  | 8636(6)  | 6410(4)  | 4253(4)  | 42(1) |
| C(38)  | 5945(4)  | 7383(4)  | 10160(3) | 25(1) |
| C(39)  | 6022(6)  | 8122(6)  | 10673(4) | 62(2) |
| C(40)  | 6330(6)  | 6317(5)  | 10675(4) | 56(2) |
| N(1)   | 4050(3)  | 8110(2)  | 6186(2)  | 15(1) |
| C(41)  | 4019(4)  | 9137(3)  | 5739(3)  | 21(1) |
| C(42)  | 3390(4)  | 7647(3)  | 5662(3)  | 21(1) |
| C(43)  | 3253(19) | 8356(9)  | 4782(6)  | 32(4) |
| C(44)  | 3631(15) | 9152(9)  | 4811(6)  | 24(3) |
| C(43') | 2675(15) | 8529(8)  | 4989(9)  | 31(3) |
| C(44') | 3044(17) | 9338(9)  | 5013(9)  | 35(4) |
| F(1)   | 8347(2)  | 5891(2)  | 8616(2)  | 23(1) |
| F(2)   | 10689(3) | 4987(2)  | 7930(2)  | 31(1) |

|       |          |          |          |       |
|-------|----------|----------|----------|-------|
| F(3)  | 11703(3) | 5845(2)  | 6403(2)  | 33(1) |
| F(4)  | 10265(3) | 7667(2)  | 5560(2)  | 33(1) |
| F(5)  | 7906(2)  | 8609(2)  | 6232(2)  | 21(1) |
| F(6)  | 8883(2)  | 8081(2)  | 8676(2)  | 18(1) |
| F(7)  | 9280(2)  | 9722(2)  | 8917(2)  | 23(1) |
| F(8)  | 7614(3)  | 11543(2) | 8212(2)  | 28(1) |
| F(9)  | 5515(2)  | 11640(2) | 7287(2)  | 22(1) |
| F(10) | 5010(2)  | 10042(2) | 7073(2)  | 18(1) |
| F(11) | 3288(3)  | 10147(2) | 8505(2)  | 24(1) |
| F(12) | 1626(3)  | 11661(2) | 7590(2)  | 33(1) |
| F(13) | -154(3)  | 11441(2) | 6540(2)  | 39(1) |
| F(14) | -172(3)  | 9581(2)  | 6454(2)  | 33(1) |
| F(15) | 1495(2)  | 7998(2)  | 7382(2)  | 23(1) |
| F(16) | 2050(2)  | 8998(2)  | 9767(2)  | 20(1) |
| F(17) | 111(2)   | 8532(2)  | 10851(2) | 25(1) |
| F(18) | -528(2)  | 6848(2)  | 10848(2) | 26(1) |
| F(19) | 821(3)   | 5642(2)  | 9703(2)  | 29(1) |
| F(20) | 2700(3)  | 6078(2)  | 8606(2)  | 28(1) |
| F(21) | 8884(4)  | 5441(2)  | 4542(2)  | 53(1) |
| F(22) | 8554(5)  | 6556(3)  | 3386(2)  | 74(1) |
| F(23) | 9662(4)  | 6681(3)  | 4427(3)  | 72(1) |
| O(1)  | 4020(3)  | 7278(2)  | 7885(2)  | 12(1) |
| O(2)  | 5682(3)  | 8198(2)  | 7157(2)  | 13(1) |
| O(3)  | 4632(3)  | 7603(2)  | 9843(2)  | 24(1) |
| O(4)  | 6807(3)  | 7445(2)  | 9391(2)  | 15(1) |
| O(5)  | 7268(3)  | 6760(2)  | 5631(2)  | 22(1) |
| O(6)  | 6076(4)  | 6755(3)  | 4470(3)  | 51(1) |
| O(7)  | 7034(4)  | 8114(3)  | 4477(3)  | 50(1) |
| P(1)  | 4970(1)  | 7402(1)  | 6991(1)  | 12(1) |
| Rh(1) | 6259(1)  | 5936(1)  | 6698(1)  | 14(1) |
| S(1)  | 7073(1)  | 7101(1)  | 4755(1)  | 33(1) |

---

**Table 13.** Bond lengths [ $\text{\AA}$ ] and angles [ $^\circ$ ] for Rh(cod)OTf $\cdot$ CKphos.

---

|           |          |           |          |
|-----------|----------|-----------|----------|
| C(1)-C(2) | 1.412(6) | C(1)-C(8) | 1.526(6) |
|-----------|----------|-----------|----------|

|             |          |             |          |
|-------------|----------|-------------|----------|
| C(1)-Rh(1)  | 2.113(4) | C(21)-F(7)  | 1.335(4) |
| C(2)-C(3)   | 1.515(5) | C(21)-C(22) | 1.381(6) |
| C(2)-Rh(1)  | 2.104(4) | C(22)-F(8)  | 1.336(4) |
| C(3)-C(4)   | 1.523(6) | C(22)-C(23) | 1.373(6) |
| C(4)-C(5)   | 1.518(7) | C(23)-F(9)  | 1.332(4) |
| C(5)-C(6)   | 1.352(6) | C(23)-C(24) | 1.379(5) |
| C(5)-Rh(1)  | 2.282(4) | C(24)-F(10) | 1.335(4) |
| C(6)-C(7)   | 1.532(7) | C(25)-C(30) | 1.390(5) |
| C(6)-Rh(1)  | 2.244(4) | C(25)-C(26) | 1.392(6) |
| C(7)-C(8)   | 1.523(7) | C(26)-F(20) | 1.349(4) |
| C(9)-O(1)   | 1.443(4) | C(26)-C(27) | 1.374(6) |
| C(9)-C(25)  | 1.548(5) | C(27)-F(19) | 1.332(5) |
| C(9)-C(10)  | 1.558(5) | C(27)-C(28) | 1.388(6) |
| C(9)-C(31)  | 1.564(5) | C(28)-F(18) | 1.337(5) |
| C(10)-O(3)  | 1.435(5) | C(28)-C(29) | 1.367(6) |
| C(10)-C(11) | 1.542(5) | C(29)-F(17) | 1.326(4) |
| C(11)-O(4)  | 1.412(4) | C(29)-C(30) | 1.383(6) |
| C(11)-C(12) | 1.533(5) | C(30)-F(16) | 1.336(4) |
| C(12)-O(2)  | 1.444(4) | C(31)-C(32) | 1.378(6) |
| C(12)-C(19) | 1.540(5) | C(31)-C(36) | 1.395(5) |
| C(12)-C(13) | 1.553(5) | C(32)-F(11) | 1.348(5) |
| C(13)-C(18) | 1.389(6) | C(32)-C(33) | 1.399(6) |
| C(13)-C(14) | 1.397(6) | C(33)-F(12) | 1.325(5) |
| C(14)-F(1)  | 1.337(5) | C(33)-C(34) | 1.370(6) |
| C(14)-C(15) | 1.384(6) | C(34)-F(13) | 1.339(5) |
| C(15)-F(2)  | 1.333(5) | C(34)-C(35) | 1.373(6) |
| C(15)-C(16) | 1.372(7) | C(35)-F(14) | 1.346(5) |
| C(16)-F(3)  | 1.337(5) | C(35)-C(36) | 1.364(6) |
| C(16)-C(17) | 1.383(7) | C(36)-F(15) | 1.356(5) |
| C(17)-F(4)  | 1.327(5) | C(37)-F(23) | 1.322(7) |
| C(17)-C(18) | 1.373(6) | C(37)-F(21) | 1.324(6) |
| C(18)-F(5)  | 1.340(5) | C(37)-F(22) | 1.331(7) |
| C(19)-C(24) | 1.397(5) | C(37)-S(1)  | 1.828(6) |
| C(19)-C(20) | 1.408(5) | C(38)-O(4)  | 1.428(5) |
| C(20)-F(6)  | 1.344(4) | C(38)-O(3)  | 1.431(5) |
| C(20)-C(21) | 1.379(5) | C(38)-C(39) | 1.482(7) |

|                  |            |                   |          |
|------------------|------------|-------------------|----------|
| C(38)-C(40)      | 1.527(7)   | O(1)-C(9)-C(31)   | 109.3(3) |
| N(1)-C(42)       | 1.488(5)   | C(25)-C(9)-C(31)  | 104.6(3) |
| N(1)-C(41)       | 1.489(5)   | C(10)-C(9)-C(31)  | 115.8(3) |
| N(1)-P(1)        | 1.629(3)   | O(3)-C(10)-C(11)  | 98.9(3)  |
| C(41)-C(44')     | 1.527(10)  | O(3)-C(10)-C(9)   | 110.3(3) |
| C(41)-C(44)      | 1.537(10)  | C(11)-C(10)-C(9)  | 117.3(3) |
| C(42)-C(43')     | 1.515(10)  | O(4)-C(11)-C(12)  | 110.9(3) |
| C(42)-C(43)      | 1.520(10)  | O(4)-C(11)-C(10)  | 101.1(3) |
| C(43)-C(44)      | 1.333(12)  | C(12)-C(11)-C(10) | 114.7(3) |
| C(43')-C(44')    | 1.344(12)  | O(2)-C(12)-C(11)  | 106.4(3) |
| O(1)-P(1)        | 1.639(3)   | O(2)-C(12)-C(19)  | 106.9(3) |
| O(2)-P(1)        | 1.623(3)   | C(11)-C(12)-C(19) | 111.9(3) |
| O(5)-S(1)        | 1.366(3)   | O(2)-C(12)-C(13)  | 108.1(3) |
| O(5)-Rh(1)       | 2.210(3)   | C(11)-C(12)-C(13) | 115.3(3) |
| O(6)-S(1)        | 1.431(4)   | C(19)-C(12)-C(13) | 107.9(3) |
| O(7)-S(1)        | 1.421(4)   | C(18)-C(13)-C(14) | 115.8(4) |
| P(1)-Rh(1)       | 2.2366(10) | C(18)-C(13)-C(12) | 117.5(3) |
| C(2)-C(1)-C(8)   | 124.0(4)   | C(14)-C(13)-C(12) | 126.6(4) |
| C(2)-C(1)-Rh(1)  | 70.1(2)    | F(1)-C(14)-C(15)  | 116.1(4) |
| C(8)-C(1)-Rh(1)  | 113.7(3)   | F(1)-C(14)-C(13)  | 122.2(4) |
| C(1)-C(2)-C(3)   | 126.5(4)   | C(15)-C(14)-C(13) | 121.7(4) |
| C(1)-C(2)-Rh(1)  | 70.8(2)    | F(2)-C(15)-C(16)  | 120.1(4) |
| C(3)-C(2)-Rh(1)  | 109.8(3)   | F(2)-C(15)-C(14)  | 119.6(4) |
| C(2)-C(3)-C(4)   | 114.0(4)   | C(16)-C(15)-C(14) | 120.3(4) |
| C(5)-C(4)-C(3)   | 112.3(4)   | F(3)-C(16)-C(15)  | 120.4(4) |
| C(6)-C(5)-C(4)   | 122.8(4)   | F(3)-C(16)-C(17)  | 119.8(4) |
| C(6)-C(5)-Rh(1)  | 71.1(2)    | C(15)-C(16)-C(17) | 119.8(4) |
| C(4)-C(5)-Rh(1)  | 109.2(3)   | F(4)-C(17)-C(18)  | 120.5(4) |
| C(5)-C(6)-C(7)   | 126.1(4)   | F(4)-C(17)-C(16)  | 120.6(4) |
| C(5)-C(6)-Rh(1)  | 74.2(2)    | C(18)-C(17)-C(16) | 118.9(4) |
| C(7)-C(6)-Rh(1)  | 107.1(3)   | F(5)-C(18)-C(17)  | 116.9(4) |
| C(8)-C(7)-C(6)   | 113.2(4)   | F(5)-C(18)-C(13)  | 119.6(3) |
| C(7)-C(8)-C(1)   | 114.5(4)   | C(17)-C(18)-C(13) | 123.5(4) |
| O(1)-C(9)-C(25)  | 108.0(3)   | C(24)-C(19)-C(20) | 114.9(3) |
| O(1)-C(9)-C(10)  | 107.7(3)   | C(24)-C(19)-C(12) | 125.6(3) |
| C(25)-C(9)-C(10) | 111.2(3)   | C(20)-C(19)-C(12) | 119.5(3) |

|                   |          |                    |          |
|-------------------|----------|--------------------|----------|
| F(6)-C(20)-C(21)  | 115.7(3) | F(11)-C(32)-C(31)  | 123.3(4) |
| F(6)-C(20)-C(19)  | 121.0(3) | F(11)-C(32)-C(33)  | 113.9(4) |
| C(21)-C(20)-C(19) | 123.2(4) | C(31)-C(32)-C(33)  | 122.8(4) |
| F(7)-C(21)-C(20)  | 119.8(3) | F(12)-C(33)-C(34)  | 121.2(4) |
| F(7)-C(21)-C(22)  | 120.9(3) | F(12)-C(33)-C(32)  | 118.9(4) |
| C(20)-C(21)-C(22) | 119.3(4) | C(34)-C(33)-C(32)  | 119.8(4) |
| F(8)-C(22)-C(23)  | 120.3(4) | F(13)-C(34)-C(33)  | 120.4(4) |
| F(8)-C(22)-C(21)  | 120.3(4) | F(13)-C(34)-C(35)  | 120.6(4) |
| C(23)-C(22)-C(21) | 119.5(4) | C(33)-C(34)-C(35)  | 119.0(4) |
| F(9)-C(23)-C(22)  | 119.8(3) | F(14)-C(35)-C(36)  | 120.8(4) |
| F(9)-C(23)-C(24)  | 119.6(4) | F(14)-C(35)-C(34)  | 119.3(4) |
| C(22)-C(23)-C(24) | 120.6(4) | C(36)-C(35)-C(34)  | 119.8(4) |
| F(10)-C(24)-C(23) | 115.1(3) | F(15)-C(36)-C(35)  | 116.1(4) |
| F(10)-C(24)-C(19) | 122.4(3) | F(15)-C(36)-C(31)  | 119.9(3) |
| C(23)-C(24)-C(19) | 122.5(3) | C(35)-C(36)-C(31)  | 123.9(4) |
| C(30)-C(25)-C(26) | 115.2(4) | F(23)-C(37)-F(21)  | 108.6(5) |
| C(30)-C(25)-C(9)  | 118.0(3) | F(23)-C(37)-F(22)  | 108.9(5) |
| C(26)-C(25)-C(9)  | 126.6(3) | F(21)-C(37)-F(22)  | 106.5(4) |
| F(20)-C(26)-C(27) | 114.9(4) | F(23)-C(37)-S(1)   | 111.1(4) |
| F(20)-C(26)-C(25) | 122.5(4) | F(21)-C(37)-S(1)   | 110.9(4) |
| C(27)-C(26)-C(25) | 122.6(4) | F(22)-C(37)-S(1)   | 110.7(4) |
| F(19)-C(27)-C(26) | 120.1(4) | O(4)-C(38)-O(3)    | 105.2(3) |
| F(19)-C(27)-C(28) | 119.7(4) | O(4)-C(38)-C(39)   | 108.6(4) |
| C(26)-C(27)-C(28) | 120.2(4) | O(3)-C(38)-C(39)   | 111.8(4) |
| F(18)-C(28)-C(29) | 120.2(4) | O(4)-C(38)-C(40)   | 109.5(4) |
| F(18)-C(28)-C(27) | 120.6(4) | O(3)-C(38)-C(40)   | 107.9(4) |
| C(29)-C(28)-C(27) | 119.2(4) | C(39)-C(38)-C(40)  | 113.5(5) |
| F(17)-C(29)-C(28) | 120.2(4) | C(42)-N(1)-C(41)   | 111.3(3) |
| F(17)-C(29)-C(30) | 120.2(4) | C(42)-N(1)-P(1)    | 118.7(3) |
| C(28)-C(29)-C(30) | 119.5(4) | C(41)-N(1)-P(1)    | 128.2(3) |
| F(16)-C(30)-C(29) | 117.4(3) | N(1)-C(41)-C(44')  | 101.8(5) |
| F(16)-C(30)-C(25) | 119.3(4) | N(1)-C(41)-C(44)   | 101.4(5) |
| C(29)-C(30)-C(25) | 123.4(4) | C(44')-C(41)-C(44) | 25.1(5)  |
| C(32)-C(31)-C(36) | 114.5(4) | N(1)-C(42)-C(43')  | 102.3(5) |
| C(32)-C(31)-C(9)  | 127.9(3) | N(1)-C(42)-C(43)   | 102.2(5) |
| C(36)-C(31)-C(9)  | 117.2(3) | C(43')-C(42)-C(43) | 25.0(5)  |

|                     |            |                 |            |
|---------------------|------------|-----------------|------------|
| C(44)-C(43)-C(42)   | 111.7(8)   | O(5)-Rh(1)-P(1) | 87.94(7)   |
| C(43)-C(44)-C(41)   | 111.4(8)   | C(2)-Rh(1)-C(6) | 96.47(16)  |
| C(44')-C(43')-C(42) | 111.3(8)   | C(1)-Rh(1)-C(6) | 81.63(17)  |
| C(43')-C(44')-C(41) | 111.6(8)   | O(5)-Rh(1)-C(6) | 89.65(14)  |
| C(9)-O(1)-P(1)      | 128.2(2)   | P(1)-Rh(1)-C(6) | 162.45(12) |
| C(12)-O(2)-P(1)     | 122.9(2)   | C(2)-Rh(1)-C(5) | 81.26(16)  |
| C(38)-O(3)-C(10)    | 108.0(3)   | C(1)-Rh(1)-C(5) | 89.16(16)  |
| C(11)-O(4)-C(38)    | 108.1(3)   | O(5)-Rh(1)-C(5) | 90.24(14)  |
| S(1)-O(5)-Rh(1)     | 134.0(2)   | P(1)-Rh(1)-C(5) | 162.54(12) |
| O(2)-P(1)-N(1)      | 97.64(15)  | C(6)-Rh(1)-C(5) | 34.76(16)  |
| O(2)-P(1)-O(1)      | 102.58(13) | O(5)-S(1)-O(7)  | 113.5(2)   |
| N(1)-P(1)-O(1)      | 109.63(16) | O(5)-S(1)-O(6)  | 111.1(2)   |
| O(2)-P(1)-Rh(1)     | 118.95(11) | O(7)-S(1)-O(6)  | 119.4(3)   |
| N(1)-P(1)-Rh(1)     | 114.40(12) | O(5)-S(1)-C(37) | 102.5(2)   |
| O(1)-P(1)-Rh(1)     | 112.18(10) | O(7)-S(1)-C(37) | 104.4(3)   |
| C(2)-Rh(1)-C(1)     | 39.13(16)  | O(6)-S(1)-C(37) | 103.7(3)   |
| C(2)-Rh(1)-O(5)     | 154.66(14) |                 |            |
| C(1)-Rh(1)-O(5)     | 165.46(14) |                 |            |
| C(2)-Rh(1)-P(1)     | 93.09(11)  |                 |            |
| C(1)-Rh(1)-P(1)     | 96.87(11)  |                 |            |

---

Symmetry transformations used to generate equivalent atoms:

**Table 14.** Anisotropic displacement parameters ( $\text{\AA}^2 \times 10^3$ ) for Rh(cod)OTf·CKphos. The anisotropic displacement factor exponent takes the form:  $-2p^2 [ h^2 a^* 2U^{11} + \dots + 2 h k a^* b^* U^{12} ]$

|      | U <sup>11</sup> | U <sup>22</sup> | U <sup>33</sup> | U <sup>23</sup> | U <sup>13</sup> | U <sup>12</sup> |
|------|-----------------|-----------------|-----------------|-----------------|-----------------|-----------------|
| C(1) | 22(2)           | 12(2)           | 19(2)           | -1(2)           | 2(2)            | -5(2)           |
| C(2) | 21(2)           | 16(2)           | 24(2)           | -7(2)           | 4(2)            | -10(2)          |
| C(3) | 26(2)           | 27(2)           | 38(3)           | -16(2)          | 2(2)            | -13(2)          |
| C(4) | 36(3)           | 22(2)           | 40(3)           | -19(2)          | 4(2)            | -12(2)          |
| C(5) | 27(2)           | 17(2)           | 33(2)           | -15(2)          | 11(2)           | -5(2)           |
| C(6) | 17(2)           | 17(2)           | 41(3)           | -11(2)          | 8(2)            | -3(2)           |
| C(7) | 25(2)           | 18(2)           | 41(3)           | -3(2)           | -4(2)           | 1(2)            |
| C(8) | 32(3)           | 18(2)           | 29(2)           | 3(2)            | -4(2)           | -1(2)           |
| C(9) | 13(2)           | 10(2)           | 16(2)           | -5(2)           | 2(2)            | -3(2)           |



|       |        |        |       |        |        |        |
|-------|--------|--------|-------|--------|--------|--------|
| C(10) | 15(2)  | 14(2)  | 16(2) | -4(2)  | 2(2)   | -6(2)  |
| C(11) | 15(2)  | 12(2)  | 15(2) | -3(2)  | -4(2)  | -3(2)  |
| C(12) | 14(2)  | 11(2)  | 15(2) | -2(1)  | -4(2)  | -4(2)  |
| C(13) | 11(2)  | 13(2)  | 22(2) | -6(2)  | -4(2)  | -4(2)  |
| C(14) | 19(2)  | 15(2)  | 17(2) | -3(2)  | -2(2)  | -6(2)  |
| C(15) | 14(2)  | 15(2)  | 34(2) | -6(2)  | -6(2)  | -1(2)  |
| C(16) | 12(2)  | 26(2)  | 35(2) | -15(2) | 2(2)   | -6(2)  |
| C(17) | 19(2)  | 31(2)  | 24(2) | -10(2) | 6(2)   | -14(2) |
| C(18) | 15(2)  | 15(2)  | 23(2) | -4(2)  | -2(2)  | -5(2)  |
| C(19) | 12(2)  | 15(2)  | 14(2) | -3(2)  | 1(1)   | -6(2)  |
| C(20) | 16(2)  | 13(2)  | 17(2) | -1(2)  | -1(2)  | -2(2)  |
| C(21) | 18(2)  | 18(2)  | 17(2) | -5(2)  | -1(2)  | -6(2)  |
| C(22) | 25(2)  | 11(2)  | 23(2) | -7(2)  | 3(2)   | -10(2) |
| C(23) | 20(2)  | 12(2)  | 14(2) | 0(2)   | 3(2)   | -3(2)  |
| C(24) | 13(2)  | 14(2)  | 12(2) | -3(2)  | -1(1)  | -4(2)  |
| C(25) | 10(2)  | 17(2)  | 17(2) | -2(2)  | -2(2)  | -3(2)  |
| C(26) | 15(2)  | 16(2)  | 18(2) | -5(2)  | 2(2)   | -2(2)  |
| C(27) | 21(2)  | 19(2)  | 21(2) | 0(2)   | -2(2)  | -12(2) |
| C(28) | 13(2)  | 24(2)  | 15(2) | 2(2)   | 0(2)   | -9(2)  |
| C(29) | 16(2)  | 21(2)  | 15(2) | -4(2)  | -2(2)  | -2(2)  |
| C(30) | 12(2)  | 17(2)  | 15(2) | -2(2)  | -2(2)  | -5(2)  |
| C(31) | 12(2)  | 16(2)  | 14(2) | -4(2)  | 1(2)   | -1(2)  |
| C(32) | 20(2)  | 24(2)  | 19(2) | -6(2)  | 2(2)   | -7(2)  |
| C(33) | 29(2)  | 16(2)  | 25(2) | -2(2)  | 3(2)   | -5(2)  |
| C(34) | 19(2)  | 25(2)  | 25(2) | 3(2)   | 2(2)   | 2(2)   |
| C(35) | 14(2)  | 31(2)  | 23(2) | -5(2)  | -3(2)  | -5(2)  |
| C(36) | 16(2)  | 16(2)  | 19(2) | -3(2)  | 0(2)   | -4(2)  |
| C(37) | 49(3)  | 36(3)  | 45(3) | -13(3) | 13(3)  | -18(3) |
| C(38) | 16(2)  | 43(3)  | 16(2) | -6(2)  | 0(2)   | -9(2)  |
| C(39) | 25(3)  | 116(6) | 63(4) | -71(4) | 0(3)   | -11(3) |
| C(40) | 28(3)  | 78(5)  | 41(3) | 38(3)  | -7(2)  | -18(3) |
| N(1)  | 18(2)  | 14(2)  | 16(2) | -2(1)  | -5(1)  | -7(1)  |
| C(41) | 26(2)  | 14(2)  | 21(2) | 3(2)   | -8(2)  | -9(2)  |
| C(42) | 23(2)  | 21(2)  | 22(2) | -7(2)  | -6(2)  | -10(2) |
| C(43) | 57(10) | 27(6)  | 11(5) | -1(4)  | -13(5) | -7(6)  |
| C(44) | 27(6)  | 28(6)  | 17(5) | 7(4)   | -7(4)  | -15(5) |

|        |        |       |        |        |        |        |
|--------|--------|-------|--------|--------|--------|--------|
| C(43') | 32(7)  | 30(6) | 31(7)  | -5(5)  | -19(5) | -4(5)  |
| C(44') | 41(8)  | 31(6) | 26(6)  | 9(5)   | -25(6) | -3(6)  |
| F(1)   | 22(1)  | 15(1) | 25(1)  | -1(1)  | 0(1)   | 0(1)   |
| F(2)   | 23(1)  | 17(1) | 45(2)  | -5(1)  | -5(1)  | 5(1)   |
| F(3)   | 16(1)  | 33(2) | 49(2)  | -18(1) | 10(1)  | -1(1)  |
| F(4)   | 25(1)  | 41(2) | 29(1)  | -5(1)  | 14(1)  | -12(1) |
| F(5)   | 20(1)  | 18(1) | 21(1)  | 2(1)   | 2(1)   | -5(1)  |
| F(6)   | 16(1)  | 13(1) | 24(1)  | -3(1)  | -6(1)  | -2(1)  |
| F(7)   | 18(1)  | 23(1) | 31(1)  | -10(1) | -9(1)  | -8(1)  |
| F(8)   | 34(2)  | 15(1) | 40(2)  | -7(1)  | -8(1)  | -12(1) |
| F(9)   | 28(1)  | 11(1) | 25(1)  | 0(1)   | -6(1)  | -2(1)  |
| F(10)  | 16(1)  | 15(1) | 23(1)  | -1(1)  | -7(1)  | -2(1)  |
| F(11)  | 29(1)  | 18(1) | 28(1)  | -8(1)  | -3(1)  | -9(1)  |
| F(12)  | 42(2)  | 14(1) | 38(2)  | -4(1)  | 0(1)   | -5(1)  |
| F(13)  | 37(2)  | 25(2) | 44(2)  | 6(1)   | -12(1) | 5(1)   |
| F(14)  | 26(1)  | 40(2) | 30(1)  | -1(1)  | -12(1) | -7(1)  |
| F(15)  | 23(1)  | 21(1) | 27(1)  | -7(1)  | -4(1)  | -9(1)  |
| F(16)  | 22(1)  | 20(1) | 23(1)  | -10(1) | 6(1)   | -11(1) |
| F(17)  | 23(1)  | 30(1) | 24(1)  | -12(1) | 9(1)   | -10(1) |
| F(18)  | 20(1)  | 33(2) | 26(1)  | -4(1)  | 7(1)   | -14(1) |
| F(19)  | 33(2)  | 24(1) | 38(2)  | -9(1)  | 9(1)   | -20(1) |
| F(20)  | 34(2)  | 19(1) | 36(2)  | -15(1) | 15(1)  | -14(1) |
| F(21)  | 59(2)  | 35(2) | 62(2)  | -14(2) | 21(2)  | -11(2) |
| F(22)  | 114(4) | 62(3) | 36(2)  | -16(2) | 31(2)  | -19(2) |
| F(23)  | 48(2)  | 77(3) | 109(3) | -53(3) | 36(2)  | -34(2) |
| O(1)   | 13(1)  | 12(1) | 13(1)  | -5(1)  | 2(1)   | -5(1)  |
| O(2)   | 13(1)  | 13(1) | 13(1)  | -2(1)  | -2(1)  | -6(1)  |
| O(3)   | 14(2)  | 44(2) | 12(1)  | -3(1)  | -1(1)  | -10(1) |
| O(4)   | 14(1)  | 19(1) | 12(1)  | -1(1)  | -2(1)  | -6(1)  |
| O(5)   | 22(2)  | 12(1) | 35(2)  | -11(1) | 25(1)  | -12(1) |
| O(6)   | 43(2)  | 75(3) | 45(2)  | -25(2) | -7(2)  | -19(2) |
| O(7)   | 70(3)  | 32(2) | 39(2)  | -3(2)  | 10(2)  | -8(2)  |
| P(1)   | 13(1)  | 11(1) | 13(1)  | -3(1)  | 0(1)   | -4(1)  |
| Rh(1)  | 15(1)  | 12(1) | 17(1)  | -5(1)  | 1(1)   | -3(1)  |
| S(1)   | 35(1)  | 34(1) | 31(1)  | -11(1) | 2(1)   | -9(1)  |



**Table 15.** Hydrogen coordinates ( $\times 10^4$ ) and isotropic displacement parameters ( $\text{\AA}^2 \times 10^3$ ) for Rh(cod)OTf•CKphos.

|        | x    | y    | z     | U(eq) |
|--------|------|------|-------|-------|
| H(1)   | 5415 | 5415 | 8349  | 22    |
| H(2)   | 3936 | 5663 | 7356  | 23    |
| H(3A)  | 4230 | 4849 | 6163  | 33    |
| H(3B)  | 4328 | 4016 | 7000  | 33    |
| H(4A)  | 6532 | 3340 | 6779  | 36    |
| H(4B)  | 6037 | 3661 | 5816  | 36    |
| H(5)   | 7371 | 4660 | 5469  | 30    |
| H(6)   | 8803 | 4682 | 6365  | 30    |
| H(7A)  | 8603 | 3274 | 7580  | 36    |
| H(7B)  | 8751 | 4205 | 7886  | 36    |
| H(8A)  | 7027 | 3994 | 8749  | 35    |
| H(8B)  | 6511 | 3527 | 8083  | 35    |
| H(10)  | 4601 | 8768 | 8885  | 17    |
| H(11)  | 6106 | 6801 | 8622  | 17    |
| H(39A) | 5735 | 8777 | 10323 | 93    |
| H(39B) | 6930 | 7982 | 10835 | 93    |
| H(39C) | 5450 | 8086 | 11194 | 93    |
| H(40A) | 5803 | 6287 | 11216 | 83    |
| H(40B) | 7264 | 6108 | 10799 | 83    |
| H(40C) | 6166 | 5886 | 10333 | 83    |
| H(41A) | 4889 | 9243 | 5731  | 25    |
| H(41B) | 3354 | 9632 | 6017  | 25    |
| H(41C) | 4900 | 9166 | 5499  | 25    |
| H(41D) | 3689 | 9605 | 6137  | 25    |
| H(42A) | 2520 | 7617 | 5924  | 25    |
| H(42B) | 3943 | 6984 | 5604  | 25    |
| H(42C) | 2760 | 7347 | 6025  | 25    |
| H(42D) | 4045 | 7148 | 5383  | 25    |
| H(43A) | 3800 | 8010 | 4337  | 39    |
| H(43B) | 2327 | 8568 | 4616  | 39    |

|        |      |      |      |    |
|--------|------|------|------|----|
| H(44A) | 2902 | 9748 | 4629 | 28 |
| H(44B) | 4391 | 9169 | 4403 | 28 |
| H(43C) | 2882 | 8365 | 4407 | 37 |
| H(43D) | 1713 | 8673 | 5103 | 37 |
| H(44C) | 2253 | 9878 | 5111 | 42 |
| H(44D) | 3465 | 9542 | 4451 | 42 |

---

## 6. Synthesis and X-ray of $\text{Co}(\text{CO})_3n\text{-BuN}_4\cdot\text{CKPhos}$

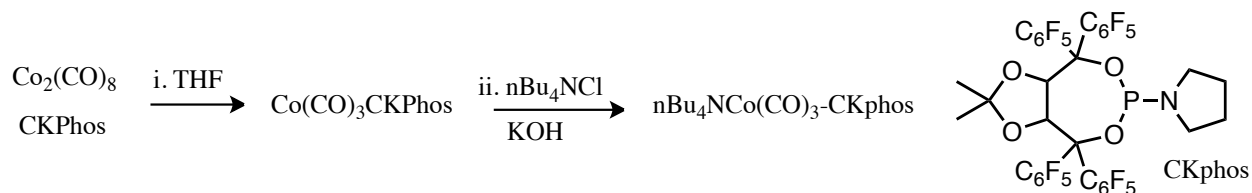

In an Ar atmosphere glove box to an oven-dried 20 ml scintillation vial equipped with a magnetic stirbar was added  $\text{Co}_2\text{CO}_8$  (15 mg, 0.044 mmol, 1 equiv), racemic CKPhos (55 mg, 0.059 mmol) and THF (2 ml). Bubbling (release of CO) occurs and the resultant dark brown solution is stirred 30 minutes at room temperature.  $n\text{-Bu}_4\text{NCl}$  (37 mg, 0.133 mmol) and KOH (10 mg, 0.178 mmol) are then added and the heterogeneous solution is stirred overnight. Reaction mixture is then filtered through a plug of cotton in a glass pipette. THF was removed under reduced pressure and DCM was added to the solid residue. Layering with hexanes and slow evaporation provided tan crystals of X-ray quality (50 mg, 43% yield).

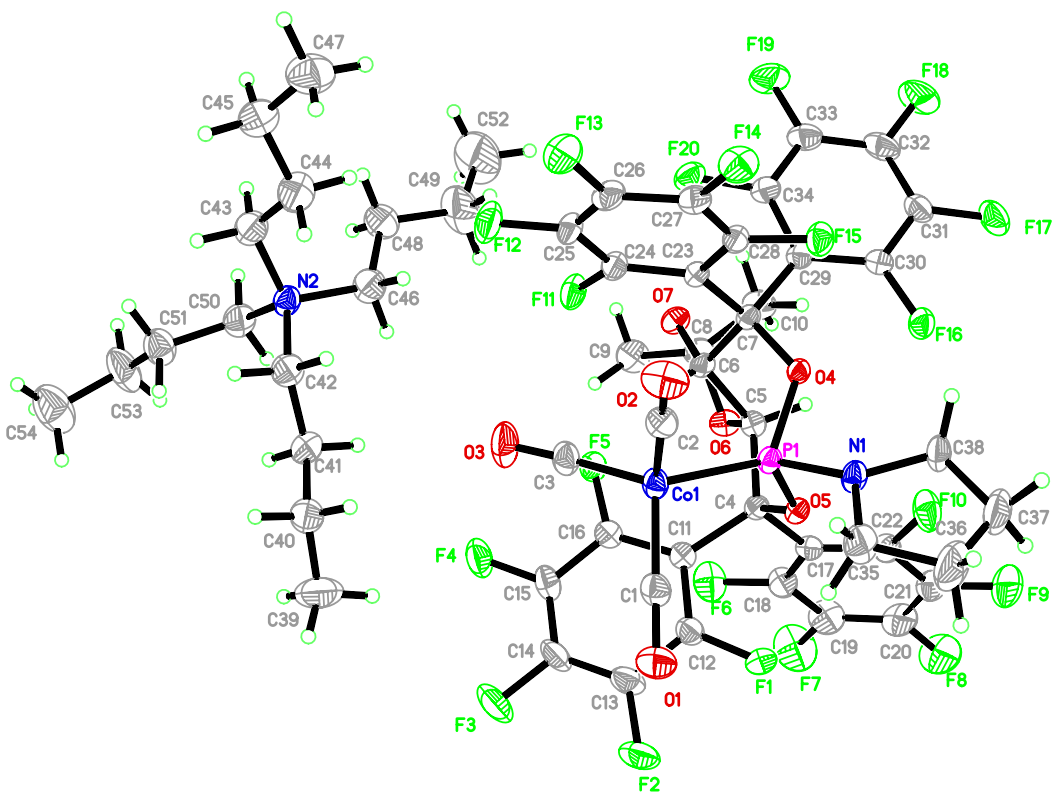

**Table 16.** Crystal data and structure refinement for  $\text{Co}(\text{CO})_3n\text{-Bu}_4\text{N}\cdot\text{CKphos}$ .

|                                 |                                                                         |                            |
|---------------------------------|-------------------------------------------------------------------------|----------------------------|
| Identification code             | rovis141r_0m-sr                                                         |                            |
| Empirical formula               | $\text{C}_{54}\text{H}_{52}\text{CoF}_{20}\text{N}_2\text{O}_7\text{P}$ |                            |
| Formula weight                  | 1310.88                                                                 |                            |
| Temperature                     | 120 K                                                                   |                            |
| Wavelength                      | 0.71073 Å                                                               |                            |
| Crystal system                  | Triclinic                                                               |                            |
| Space group                     | $P-1$                                                                   |                            |
| Unit cell dimensions            | $a = 13.4123(5)$ Å                                                      | $\alpha = 94.268(2)^\circ$ |
|                                 | $b = 14.8876(6)$ Å                                                      | $\beta = 90.340(2)^\circ$  |
|                                 | $c = 16.7728(7)$ Å                                                      | $\gamma = 97.344(2)^\circ$ |
| Volume                          | $3312.1(2)$ Å <sup>3</sup>                                              |                            |
| Z                               | 2                                                                       |                            |
| Density (calculated)            | 1.314 Mg/m <sup>3</sup>                                                 |                            |
| Absorption coefficient          | 0.385 mm <sup>-1</sup>                                                  |                            |
| $F_{000}$                       | 1336                                                                    |                            |
| Crystal size                    | 0.56 x 0.21 x 0.05 mm <sup>3</sup>                                      |                            |
| Theta range for data collection | 1.22 to 26.45°.                                                         |                            |

|                                   |                                             |
|-----------------------------------|---------------------------------------------|
| Index ranges                      | -16≤h≤15, -18≤k≤18, -20≤l≤20                |
| Reflections collected             | 48968                                       |
| Independent reflections           | 13496 [R <sub>int</sub> = 0.0482]           |
| Completeness to theta = 26.45°    | 98.8 %                                      |
| Absorption correction             | multi-scan                                  |
| Max. and min. transmission        | 0.9795 and 0.8137                           |
| Refinement method                 | Full-matrix least-squares on F <sup>2</sup> |
| Data / restraints / parameters    | 13496 / 0 / 772                             |
| Goodness-of-fit on F <sup>2</sup> | 0.934                                       |
| Final R indices [I>2sigma(I)]     | R1 = 0.0571, wR2 = 0.1458                   |
| R indices (all data)              | R1 = 0.1172, wR2 = 0.1645                   |
| Largest diff. peak and hole       | 0.535 and -0.318 e.Å <sup>-3</sup>          |

**Table 17.** Atomic coordinates ( × 10<sup>4</sup>) and equivalent isotropic displacement parameters (Å<sup>2</sup> × 10<sup>3</sup>) for Co(CO)<sub>3</sub>n-Bu<sub>4</sub>N•CKphos. U(eq) is defined as one third of the trace of the orthogonalized U<sup>ij</sup> tensor.

|       | x       | y       | z       | U(eq) |
|-------|---------|---------|---------|-------|
| C(1)  | 1347(3) | 3478(2) | 4123(2) | 63(1) |
| C(2)  | 2441(3) | 2324(2) | 5031(2) | 61(1) |
| C(3)  | 3367(3) | 3303(2) | 3786(2) | 65(1) |
| C(4)  | 1574(2) | 1869(2) | 1843(2) | 45(1) |
| C(5)  | 2393(2) | 1244(2) | 1700(2) | 45(1) |
| C(6)  | 3280(2) | 1306(2) | 2299(2) | 45(1) |
| C(7)  | 3085(2) | 620(2)  | 2959(2) | 43(1) |
| C(8)  | 3808(3) | 1090(2) | 982(2)  | 60(1) |
| C(9)  | 4583(3) | 1708(3) | 529(2)  | 84(1) |
| C(10) | 3709(3) | 97(3)   | 644(2)  | 76(1) |
| C(11) | 1846(3) | 2913(2) | 1951(2) | 49(1) |
| C(12) | 1070(3) | 3420(2) | 2136(2) | 61(1) |
| C(13) | 1207(4) | 4354(3) | 2260(3) | 79(1) |
| C(14) | 2139(4) | 4818(2) | 2205(3) | 85(1) |
| C(15) | 2920(3) | 4355(3) | 2008(2) | 73(1) |
| C(16) | 2786(3) | 3421(2) | 1897(2) | 56(1) |



|       |          |          |         |        |
|-------|----------|----------|---------|--------|
| C(17) | 825(3)   | 1642(2)  | 1123(2) | 51(1)  |
| C(18) | 890(3)   | 2108(3)  | 446(2)  | 71(1)  |
| C(19) | 217(4)   | 1922(3)  | -188(3) | 92(2)  |
| C(20) | -560(4)  | 1253(4)  | -148(3) | 90(2)  |
| C(21) | -634(3)  | 754(3)   | 475(3)  | 75(1)  |
| C(22) | 63(3)    | 936(3)   | 1092(2) | 61(1)  |
| C(23) | 3739(2)  | 846(2)   | 3721(2) | 43(1)  |
| C(24) | 4556(3)  | 1497(2)  | 3850(2) | 54(1)  |
| C(25) | 5051(3)  | 1677(2)  | 4569(2) | 60(1)  |
| C(26) | 4742(3)  | 1197(3)  | 5200(2) | 64(1)  |
| C(27) | 3948(3)  | 525(2)   | 5113(2) | 58(1)  |
| C(28) | 3473(2)  | 358(2)   | 4376(2) | 51(1)  |
| C(29) | 3219(2)  | -340(2)  | 2617(2) | 47(1)  |
| C(30) | 2449(3)  | -1025(2) | 2385(2) | 51(1)  |
| C(31) | 2622(3)  | -1861(2) | 2057(2) | 65(1)  |
| C(32) | 3580(4)  | -2053(3) | 1947(3) | 81(1)  |
| C(33) | 4373(3)  | -1404(3) | 2179(3) | 76(1)  |
| C(34) | 4185(3)  | -580(2)  | 2508(2) | 58(1)  |
| C(35) | -136(3)  | 1495(3)  | 4340(3) | 89(1)  |
| C(36) | -1098(4) | 916(4)   | 4325(4) | 145(3) |
| C(37) | -1009(4) | 104(4)   | 3846(4) | 145(3) |
| C(38) | 26(3)    | 113(2)   | 3551(2) | 67(1)  |
| C(39) | 4645(5)  | 6448(4)  | 3510(4) | 157(3) |
| C(40) | 5267(3)  | 5971(3)  | 4012(3) | 91(1)  |
| C(41) | 6051(3)  | 5517(3)  | 3546(3) | 88(1)  |
| C(42) | 6737(3)  | 5105(3)  | 4048(3) | 77(1)  |
| C(43) | 8287(3)  | 4400(3)  | 4275(3) | 84(1)  |
| C(44) | 7878(4)  | 3750(3)  | 4855(3) | 99(2)  |
| C(45) | 8584(4)  | 3563(4)  | 5483(3) | 110(2) |
| C(46) | 7054(3)  | 3759(3)  | 3187(3) | 85(1)  |
| C(47) | 8192(4)  | 2849(4)  | 6013(3) | 123(2) |
| C(48) | 7704(4)  | 3147(3)  | 2787(3) | 102(2) |
| C(49) | 7164(5)  | 2306(4)  | 2381(4) | 149(3) |
| C(50) | 8127(3)  | 5216(3)  | 3064(3) | 83(1)  |
| C(51) | 8563(4)  | 6143(3)  | 3357(3) | 90(1)  |
| C(52) | 7691(6)  | 1695(5)  | 1896(5) | 207(4) |

|       |          |          |         |        |
|-------|----------|----------|---------|--------|
| C(53) | 9021(4)  | 6702(3)  | 2746(4) | 132(2) |
| C(54) | 9303(5)  | 7652(4)  | 2919(4) | 156(3) |
| Co(1) | 2237(1)  | 2737(1)  | 4102(1) | 51(1)  |
| F(1)  | 118(2)   | 3014(1)  | 2181(1) | 77(1)  |
| F(2)  | 416(2)   | 4792(2)  | 2430(2) | 114(1) |
| F(3)  | 2280(2)  | 5726(2)  | 2326(2) | 130(1) |
| F(4)  | 3855(2)  | 4802(2)  | 1936(2) | 101(1) |
| F(5)  | 3610(2)  | 3040(1)  | 1711(1) | 67(1)  |
| F(6)  | 1656(2)  | 2786(2)  | 367(1)  | 96(1)  |
| F(7)  | 338(3)   | 2436(2)  | -817(2) | 147(1) |
| F(8)  | -1230(2) | 1084(2)  | -759(2) | 132(1) |
| F(9)  | -1388(2) | 66(2)    | 496(2)  | 112(1) |
| F(10) | -78(2)   | 359(2)   | 1675(1) | 94(1)  |
| F(11) | 4929(2)  | 1986(1)  | 3250(1) | 71(1)  |
| F(12) | 5847(2)  | 2321(2)  | 4653(2) | 95(1)  |
| F(13) | 5232(2)  | 1361(2)  | 5912(1) | 92(1)  |
| F(14) | 3645(2)  | 36(2)    | 5723(1) | 79(1)  |
| F(15) | 2718(2)  | -339(1)  | 4315(1) | 64(1)  |
| F(16) | 1485(2)  | -906(1)  | 2448(1) | 65(1)  |
| F(17) | 1842(2)  | -2491(1) | 1834(1) | 89(1)  |
| F(18) | 3754(2)  | -2866(2) | 1603(2) | 118(1) |
| F(19) | 5317(2)  | -1582(2) | 2067(2) | 108(1) |
| F(20) | 4996(2)  | 20(1)    | 2723(1) | 72(1)  |
| N(1)  | 543(2)   | 1016(2)  | 3850(2) | 52(1)  |
| N(2)  | 7549(2)  | 4620(2)  | 3657(2) | 60(1)  |
| O(1)  | 742(2)   | 3977(2)  | 4140(2) | 97(1)  |
| O(2)  | 2590(2)  | 2062(2)  | 5646(2) | 91(1)  |
| O(3)  | 4117(2)  | 3728(2)  | 3621(2) | 105(1) |
| O(4)  | 2074(1)  | 626(1)   | 3198(1) | 41(1)  |
| O(5)  | 1021(1)  | 1602(1)  | 2529(1) | 44(1)  |
| O(6)  | 2864(2)  | 1417(2)  | 965(1)  | 56(1)  |
| O(7)  | 4102(2)  | 1149(2)  | 1808(1) | 55(1)  |
| P(1)  | 1533(1)  | 1552(1)  | 3437(1) | 43(1)  |

---

**Table 18.** Bond lengths [ $\text{\AA}$ ] and angles [ $^\circ$ ] for  $\text{Co}(\text{CO})_3\text{n-Bu}_4\text{N}\cdot\text{CKphos}$ .

---

|             |          |             |          |
|-------------|----------|-------------|----------|
| C(1)-O(1)   | 1.167(4) | C(17)-C(18) | 1.371(5) |
| C(1)-Co(1)  | 1.726(4) | C(18)-F(6)  | 1.360(4) |
| C(2)-O(2)   | 1.153(4) | C(18)-C(19) | 1.379(6) |
| C(2)-Co(1)  | 1.750(4) | C(19)-F(7)  | 1.349(5) |
| C(3)-O(3)   | 1.164(4) | C(19)-C(20) | 1.350(6) |
| C(3)-Co(1)  | 1.743(4) | C(20)-C(21) | 1.325(6) |
| C(4)-O(5)   | 1.427(4) | C(20)-F(8)  | 1.346(5) |
| C(4)-C(5)   | 1.537(4) | C(21)-F(9)  | 1.347(4) |
| C(4)-C(11)  | 1.548(4) | C(21)-C(22) | 1.379(5) |
| C(4)-C(17)  | 1.555(4) | C(22)-F(10) | 1.348(4) |
| C(5)-O(6)   | 1.413(3) | C(23)-C(24) | 1.372(4) |
| C(5)-C(6)   | 1.542(4) | C(23)-C(28) | 1.386(4) |
| C(6)-O(7)   | 1.414(3) | C(24)-F(11) | 1.346(4) |
| C(6)-C(7)   | 1.562(4) | C(24)-C(25) | 1.366(5) |
| C(7)-O(4)   | 1.417(3) | C(25)-F(12) | 1.341(4) |
| C(7)-C(29)  | 1.532(4) | C(25)-C(26) | 1.357(5) |
| C(7)-C(23)  | 1.537(4) | C(26)-F(13) | 1.350(4) |
| C(8)-O(6)   | 1.415(4) | C(26)-C(27) | 1.364(5) |
| C(8)-O(7)   | 1.430(4) | C(27)-F(14) | 1.336(4) |
| C(8)-C(10)  | 1.532(5) | C(27)-C(28) | 1.377(5) |
| C(8)-C(9)   | 1.541(5) | C(28)-F(15) | 1.352(3) |
| C(11)-C(12) | 1.386(5) | C(29)-C(30) | 1.388(4) |
| C(11)-C(16) | 1.392(5) | C(29)-C(34) | 1.397(5) |
| C(12)-F(1)  | 1.346(4) | C(30)-F(16) | 1.332(4) |
| C(12)-C(13) | 1.378(5) | C(30)-C(31) | 1.371(5) |
| C(13)-F(2)  | 1.337(4) | C(31)-F(17) | 1.343(4) |
| C(13)-C(14) | 1.355(6) | C(31)-C(32) | 1.363(6) |
| C(14)-F(3)  | 1.341(4) | C(32)-F(18) | 1.350(4) |
| C(14)-C(15) | 1.355(6) | C(32)-C(33) | 1.377(6) |
| C(15)-F(4)  | 1.354(4) | C(33)-F(19) | 1.338(4) |
| C(15)-C(16) | 1.376(5) | C(33)-C(34) | 1.361(5) |
| C(16)-F(5)  | 1.333(4) | C(34)-F(20) | 1.345(4) |
| C(17)-C(22) | 1.367(5) | C(35)-N(1)  | 1.449(5) |

|                  |           |                   |          |
|------------------|-----------|-------------------|----------|
| C(35)-C(36)      | 1.456(6)  | O(7)-C(6)-C(5)    | 103.4(2) |
| C(36)-C(37)      | 1.419(7)  | O(7)-C(6)-C(7)    | 113.4(3) |
| C(37)-C(38)      | 1.475(6)  | C(5)-C(6)-C(7)    | 112.7(2) |
| C(38)-N(1)       | 1.482(4)  | O(4)-C(7)-C(29)   | 108.7(2) |
| C(39)-C(40)      | 1.465(7)  | O(4)-C(7)-C(23)   | 106.5(2) |
| C(40)-C(41)      | 1.513(6)  | C(29)-C(7)-C(23)  | 108.6(3) |
| C(41)-C(42)      | 1.464(6)  | O(4)-C(7)-C(6)    | 107.1(2) |
| C(42)-N(2)       | 1.509(5)  | C(29)-C(7)-C(6)   | 110.2(2) |
| C(43)-C(44)      | 1.481(6)  | C(23)-C(7)-C(6)   | 115.5(2) |
| C(43)-N(2)       | 1.511(5)  | O(6)-C(8)-O(7)    | 105.6(2) |
| C(44)-C(45)      | 1.477(6)  | O(6)-C(8)-C(10)   | 110.3(3) |
| C(45)-C(47)      | 1.484(6)  | O(7)-C(8)-C(10)   | 109.6(3) |
| C(46)-C(48)      | 1.470(6)  | O(6)-C(8)-C(9)    | 109.8(3) |
| C(46)-N(2)       | 1.526(5)  | O(7)-C(8)-C(9)    | 109.0(3) |
| C(48)-C(49)      | 1.480(6)  | C(10)-C(8)-C(9)   | 112.3(3) |
| C(49)-C(52)      | 1.432(7)  | C(12)-C(11)-C(16) | 114.7(3) |
| C(50)-C(51)      | 1.476(5)  | C(12)-C(11)-C(4)  | 117.0(3) |
| C(50)-N(2)       | 1.532(5)  | C(16)-C(11)-C(4)  | 128.2(3) |
| C(51)-C(53)      | 1.458(6)  | F(1)-C(12)-C(13)  | 116.1(4) |
| C(53)-C(54)      | 1.423(6)  | F(1)-C(12)-C(11)  | 120.7(3) |
| Co(1)-P(1)       | 2.1254(8) | C(13)-C(12)-C(11) | 123.2(4) |
| N(1)-P(1)        | 1.644(3)  | F(2)-C(13)-C(14)  | 120.7(4) |
| O(4)-P(1)        | 1.663(2)  | F(2)-C(13)-C(12)  | 119.4(4) |
| O(5)-P(1)        | 1.676(2)  | C(14)-C(13)-C(12) | 119.9(4) |
| O(1)-C(1)-Co(1)  | 179.6(4)  | F(3)-C(14)-C(15)  | 120.5(4) |
| O(2)-C(2)-Co(1)  | 178.9(4)  | F(3)-C(14)-C(13)  | 120.2(4) |
| O(3)-C(3)-Co(1)  | 175.0(3)  | C(15)-C(14)-C(13) | 119.2(4) |
| O(5)-C(4)-C(5)   | 108.3(2)  | F(4)-C(15)-C(14)  | 120.5(4) |
| O(5)-C(4)-C(11)  | 107.0(2)  | F(4)-C(15)-C(16)  | 118.6(4) |
| C(5)-C(4)-C(11)  | 121.0(3)  | C(14)-C(15)-C(16) | 120.9(4) |
| O(5)-C(4)-C(17)  | 105.7(2)  | F(5)-C(16)-C(15)  | 115.6(3) |
| C(5)-C(4)-C(17)  | 105.9(2)  | F(5)-C(16)-C(11)  | 122.3(3) |
| C(11)-C(4)-C(17) | 108.1(3)  | C(15)-C(16)-C(11) | 122.1(4) |
| O(6)-C(5)-C(4)   | 109.3(2)  | C(22)-C(17)-C(18) | 113.6(3) |
| O(6)-C(5)-C(6)   | 103.7(2)  | C(22)-C(17)-C(4)  | 123.1(3) |
| C(4)-C(5)-C(6)   | 119.7(2)  | C(18)-C(17)-C(4)  | 123.3(3) |

|                   |          |                   |            |
|-------------------|----------|-------------------|------------|
| F(6)-C(18)-C(17)  | 120.2(3) | F(16)-C(30)-C(31) | 115.2(3)   |
| F(6)-C(18)-C(19)  | 116.3(4) | F(16)-C(30)-C(29) | 122.0(3)   |
| C(17)-C(18)-C(19) | 123.5(4) | C(31)-C(30)-C(29) | 122.8(3)   |
| F(7)-C(19)-C(20)  | 122.1(4) | F(17)-C(31)-C(32) | 119.9(3)   |
| F(7)-C(19)-C(18)  | 118.6(5) | F(17)-C(31)-C(30) | 119.8(4)   |
| C(20)-C(19)-C(18) | 119.3(4) | C(32)-C(31)-C(30) | 120.3(4)   |
| C(21)-C(20)-F(8)  | 120.8(5) | F(18)-C(32)-C(31) | 120.5(4)   |
| C(21)-C(20)-C(19) | 119.8(4) | F(18)-C(32)-C(33) | 120.1(4)   |
| F(8)-C(20)-C(19)  | 119.4(5) | C(31)-C(32)-C(33) | 119.4(4)   |
| C(20)-C(21)-F(9)  | 119.5(4) | F(19)-C(33)-C(34) | 120.8(4)   |
| C(20)-C(21)-C(22) | 119.9(4) | F(19)-C(33)-C(32) | 119.8(4)   |
| F(9)-C(21)-C(22)  | 120.6(4) | C(34)-C(33)-C(32) | 119.4(4)   |
| F(10)-C(22)-C(17) | 122.4(3) | F(20)-C(34)-C(33) | 116.1(3)   |
| F(10)-C(22)-C(21) | 113.9(4) | F(20)-C(34)-C(29) | 120.3(3)   |
| C(17)-C(22)-C(21) | 123.7(4) | C(33)-C(34)-C(29) | 123.6(4)   |
| C(24)-C(23)-C(28) | 114.4(3) | N(1)-C(35)-C(36)  | 107.1(4)   |
| C(24)-C(23)-C(7)  | 128.1(3) | C(37)-C(36)-C(35) | 108.6(4)   |
| C(28)-C(23)-C(7)  | 117.5(3) | C(36)-C(37)-C(38) | 110.3(4)   |
| F(11)-C(24)-C(25) | 116.2(3) | C(37)-C(38)-N(1)  | 104.3(3)   |
| F(11)-C(24)-C(23) | 120.5(3) | C(39)-C(40)-C(41) | 113.0(5)   |
| C(25)-C(24)-C(23) | 123.2(3) | C(42)-C(41)-C(40) | 113.7(4)   |
| F(12)-C(25)-C(26) | 119.8(3) | C(41)-C(42)-N(2)  | 119.2(4)   |
| F(12)-C(25)-C(24) | 120.2(4) | C(44)-C(43)-N(2)  | 115.9(4)   |
| C(26)-C(25)-C(24) | 120.1(3) | C(45)-C(44)-C(43) | 116.2(4)   |
| F(13)-C(26)-C(25) | 120.6(4) | C(44)-C(45)-C(47) | 115.5(5)   |
| F(13)-C(26)-C(27) | 119.3(4) | C(48)-C(46)-N(2)  | 118.4(4)   |
| C(25)-C(26)-C(27) | 120.1(3) | C(46)-C(48)-C(49) | 114.8(4)   |
| F(14)-C(27)-C(26) | 120.9(3) | C(52)-C(49)-C(48) | 120.8(6)   |
| F(14)-C(27)-C(28) | 120.8(3) | C(51)-C(50)-N(2)  | 117.9(3)   |
| C(26)-C(27)-C(28) | 118.3(3) | C(53)-C(51)-C(50) | 115.0(4)   |
| F(15)-C(28)-C(27) | 115.7(3) | C(54)-C(53)-C(51) | 120.4(5)   |
| F(15)-C(28)-C(23) | 120.3(3) | C(1)-Co(1)-C(3)   | 108.34(18) |
| C(27)-C(28)-C(23) | 124.0(3) | C(1)-Co(1)-C(2)   | 113.38(17) |
| C(30)-C(29)-C(34) | 114.5(3) | C(3)-Co(1)-C(2)   | 108.66(18) |
| C(30)-C(29)-C(7)  | 125.8(3) | C(1)-Co(1)-P(1)   | 104.31(12) |
| C(34)-C(29)-C(7)  | 119.8(3) | C(3)-Co(1)-P(1)   | 120.39(11) |

|                  |            |                 |            |
|------------------|------------|-----------------|------------|
| C(2)-Co(1)-P(1)  | 101.83(11) | C(5)-O(6)-C(8)  | 107.5(2)   |
| C(35)-N(1)-C(38) | 109.6(3)   | C(6)-O(7)-C(8)  | 110.4(2)   |
| C(35)-N(1)-P(1)  | 121.9(2)   | N(1)-P(1)-O(4)  | 95.44(12)  |
| C(38)-N(1)-P(1)  | 124.7(2)   | N(1)-P(1)-O(5)  | 97.57(12)  |
| C(42)-N(2)-C(43) | 110.8(3)   | O(4)-P(1)-O(5)  | 95.50(10)  |
| C(42)-N(2)-C(46) | 108.6(3)   | N(1)-P(1)-Co(1) | 115.64(10) |
| C(43)-N(2)-C(46) | 111.2(3)   | O(4)-P(1)-Co(1) | 124.99(8)  |
| C(42)-N(2)-C(50) | 110.3(3)   | O(5)-P(1)-Co(1) | 121.56(8)  |
| C(43)-N(2)-C(50) | 108.3(3)   |                 |            |
| C(46)-N(2)-C(50) | 107.6(3)   |                 |            |
| C(7)-O(4)-P(1)   | 125.24(17) |                 |            |
| C(4)-O(5)-P(1)   | 124.50(18) |                 |            |

---

Symmetry transformations used to generate equivalent atoms:

**Table 19.** Anisotropic displacement parameters ( $\text{\AA}^2 \times 10^3$ ) for  $\text{Co}(\text{CO})_3\text{n-Bu}_4\text{N}\cdot\text{CKphos}$ . The anisotropic displacement factor exponent takes the form:  $-2p^2 [h^2 a^* 2U^{11} + \dots + 2 h k a^* b^* U^{12}]$

|       | U <sup>11</sup> | U <sup>22</sup> | U <sup>33</sup> | U <sup>23</sup> | U <sup>13</sup> | U <sup>12</sup> |
|-------|-----------------|-----------------|-----------------|-----------------|-----------------|-----------------|
| C(1)  | 68(3)           | 58(2)           | 62(2)           | -12(2)          | 11(2)           | 4(2)            |
| C(2)  | 62(2)           | 60(2)           | 58(3)           | -12(2)          | 2(2)            | 12(2)           |
| C(3)  | 66(3)           | 56(2)           | 68(3)           | -13(2)          | -1(2)           | -2(2)           |
| C(4)  | 43(2)           | 47(2)           | 45(2)           | -1(2)           | 0(2)            | 7(2)            |
| C(5)  | 51(2)           | 47(2)           | 36(2)           | -1(1)           | 5(2)            | 6(2)            |
| C(6)  | 36(2)           | 48(2)           | 50(2)           | -4(2)           | 8(2)            | 10(1)           |
| C(7)  | 35(2)           | 48(2)           | 46(2)           | 0(2)            | 2(2)            | 5(1)            |
| C(8)  | 54(2)           | 73(2)           | 54(2)           | 3(2)            | 12(2)           | 18(2)           |
| C(9)  | 83(3)           | 91(3)           | 80(3)           | 12(2)           | 33(2)           | 15(2)           |
| C(10) | 87(3)           | 78(3)           | 65(3)           | -12(2)          | 15(2)           | 29(2)           |
| C(11) | 54(2)           | 50(2)           | 43(2)           | 3(2)            | 5(2)            | 7(2)            |
| C(12) | 63(3)           | 50(2)           | 69(3)           | 2(2)            | 9(2)            | 9(2)            |
| C(13) | 89(3)           | 56(3)           | 95(3)           | 3(2)            | 25(3)           | 29(2)           |
| C(14) | 100(4)          | 36(2)           | 119(4)          | 1(2)            | 23(3)           | 9(2)            |
| C(15) | 84(3)           | 52(2)           | 79(3)           | 4(2)            | 12(2)           | -12(2)          |
| C(16) | 62(2)           | 53(2)           | 53(2)           | 5(2)            | 8(2)            | 8(2)            |
| C(17) | 55(2)           | 51(2)           | 47(2)           | 1(2)            | -2(2)           | 14(2)           |
| C(18) | 78(3)           | 69(3)           | 65(3)           | 6(2)            | -6(2)           | 6(2)            |
| C(19) | 117(4)          | 106(4)          | 55(3)           | 18(3)           | -26(3)          | 15(3)           |
| C(20) | 96(4)           | 106(4)          | 68(3)           | -14(3)          | -42(3)          | 20(3)           |
| C(21) | 72(3)           | 74(3)           | 76(3)           | -11(2)          | -17(2)          | 7(2)            |
| C(22) | 69(3)           | 61(2)           | 52(2)           | -1(2)           | -15(2)          | 7(2)            |
| C(23) | 38(2)           | 47(2)           | 44(2)           | 2(2)            | 0(2)            | 5(1)            |
| C(24) | 45(2)           | 58(2)           | 57(2)           | 5(2)            | -3(2)           | 1(2)            |
| C(25) | 46(2)           | 64(2)           | 67(3)           | -3(2)           | -14(2)          | -4(2)           |
| C(26) | 63(3)           | 73(3)           | 56(2)           | -11(2)          | -23(2)          | 16(2)           |
| C(27) | 59(2)           | 64(2)           | 52(2)           | 5(2)            | -4(2)           | 16(2)           |
| C(28) | 43(2)           | 50(2)           | 58(2)           | -1(2)           | -2(2)           | 5(2)            |

|       |        |        |        |        |        |        |
|-------|--------|--------|--------|--------|--------|--------|
| C(29) | 48(2)  | 47(2)  | 48(2)  | 2(2)   | -1(2)  | 10(2)  |
| C(30) | 55(2)  | 49(2)  | 50(2)  | 5(2)   | 0(2)   | 13(2)  |
| C(31) | 82(3)  | 43(2)  | 69(3)  | 2(2)   | -9(2)  | 9(2)   |
| C(32) | 109(4) | 53(2)  | 83(3)  | -10(2) | -3(3)  | 35(3)  |
| C(33) | 75(3)  | 74(3)  | 87(3)  | -1(2)  | 5(2)   | 35(2)  |
| C(34) | 55(2)  | 63(2)  | 57(2)  | 0(2)   | -4(2)  | 16(2)  |
| C(35) | 72(3)  | 81(3)  | 112(4) | -7(3)  | 41(3)  | 2(2)   |
| C(36) | 67(4)  | 135(5) | 222(7) | -19(5) | 54(4)  | -13(3) |
| C(37) | 58(3)  | 87(4)  | 277(8) | -33(4) | 47(4)  | -17(3) |
| C(38) | 54(2)  | 60(2)  | 80(3)  | 5(2)   | 9(2)   | -15(2) |
| C(39) | 139(5) | 150(5) | 191(7) | -44(5) | -56(5) | 88(5)  |
| C(40) | 73(3)  | 81(3)  | 117(4) | -20(3) | 9(3)   | 13(2)  |
| C(41) | 58(3)  | 86(3)  | 118(4) | 1(3)   | -4(3)  | 10(2)  |
| C(42) | 62(3)  | 78(3)  | 91(3)  | 4(2)   | 17(2)  | 8(2)   |
| C(43) | 74(3)  | 89(3)  | 88(3)  | -7(3)  | -3(3)  | 13(2)  |
| C(44) | 95(4)  | 108(4) | 91(3)  | 18(3)  | -3(3)  | 0(3)   |
| C(45) | 110(4) | 110(4) | 113(4) | 15(3)  | -25(3) | 17(3)  |
| C(46) | 82(3)  | 87(3)  | 84(3)  | -18(2) | 1(2)   | 15(2)  |
| C(47) | 136(5) | 132(5) | 110(4) | 40(4)  | -5(4)  | 30(4)  |
| C(48) | 105(4) | 83(3)  | 117(4) | -23(3) | -4(3)  | 25(3)  |
| C(49) | 155(6) | 103(4) | 179(6) | -60(4) | 50(5)  | 14(4)  |
| C(50) | 64(3)  | 87(3)  | 96(3)  | -5(3)  | 16(2)  | 11(2)  |
| C(51) | 86(3)  | 79(3)  | 104(4) | -3(3)  | 20(3)  | 1(3)   |
| C(52) | 209(8) | 152(6) | 250(9) | -96(6) | 23(7)  | 44(6)  |
| C(53) | 130(5) | 66(3)  | 193(6) | 3(3)   | 61(4)  | -18(3) |
| C(54) | 161(6) | 103(5) | 197(7) | 7(4)   | 72(5)  | -6(4)  |
| Co(1) | 52(1)  | 48(1)  | 50(1)  | -10(1) | 2(1)   | 0(1)   |
| F(1)  | 50(1)  | 70(1)  | 114(2) | 4(1)   | 7(1)   | 19(1)  |
| F(2)  | 105(2) | 72(2)  | 173(3) | 7(2)   | 30(2)  | 45(2)  |
| F(3)  | 148(3) | 42(1)  | 196(3) | 1(2)   | 30(2)  | 8(2)   |
| F(4)  | 94(2)  | 61(1)  | 139(2) | 4(1)   | 16(2)  | -21(1) |
| F(5)  | 53(1)  | 61(1)  | 87(2)  | 4(1)   | 18(1)  | 2(1)   |
| F(6)  | 121(2) | 101(2) | 63(2)  | 24(1)  | -5(1)  | -11(2) |
| F(7)  | 214(4) | 154(3) | 74(2)  | 40(2)  | -42(2) | 3(3)   |
| F(8)  | 143(3) | 154(3) | 98(2)  | -9(2)  | -64(2) | 23(2)  |
| F(9)  | 95(2)  | 116(2) | 111(2) | -18(2) | -36(2) | -22(2) |



|       |        |        |        |        |        |        |
|-------|--------|--------|--------|--------|--------|--------|
| F(10) | 110(2) | 80(2)  | 81(2)  | 8(1)   | -31(1) | -29(1) |
| F(11) | 53(1)  | 81(1)  | 75(2)  | 16(1)  | -3(1)  | -17(1) |
| F(12) | 73(2)  | 98(2)  | 104(2) | 3(1)   | -33(1) | -27(1) |
| F(13) | 103(2) | 102(2) | 69(2)  | -7(1)  | -41(1) | 9(1)   |
| F(14) | 85(2)  | 98(2)  | 57(1)  | 21(1)  | -4(1)  | 14(1)  |
| F(15) | 60(1)  | 67(1)  | 62(1)  | 18(1)  | -5(1)  | -9(1)  |
| F(16) | 57(1)  | 55(1)  | 78(1)  | -11(1) | -5(1)  | -2(1)  |
| F(17) | 111(2) | 46(1)  | 105(2) | -10(1) | -13(2) | 0(1)   |
| F(18) | 145(3) | 66(2)  | 147(2) | -26(2) | -1(2)  | 47(2)  |
| F(19) | 85(2)  | 101(2) | 145(2) | -17(2) | 6(2)   | 53(2)  |
| F(20) | 47(1)  | 79(1)  | 90(2)  | -8(1)  | 0(1)   | 18(1)  |
| N(1)  | 43(2)  | 55(2)  | 55(2)  | -7(1)  | 16(1)  | -2(1)  |
| N(2)  | 47(2)  | 65(2)  | 65(2)  | -3(2)  | 6(2)   | 3(2)   |
| O(1)  | 88(2)  | 80(2)  | 127(3) | -5(2)  | 14(2)  | 32(2)  |
| O(2)  | 122(3) | 100(2) | 57(2)  | 6(2)   | 2(2)   | 38(2)  |
| O(3)  | 80(2)  | 89(2)  | 131(3) | -6(2)  | 21(2)  | -32(2) |
| O(4)  | 34(1)  | 40(1)  | 48(1)  | -2(1)  | 4(1)   | 3(1)   |
| O(5)  | 37(1)  | 50(1)  | 43(1)  | -1(1)  | 1(1)   | 4(1)   |
| O(6)  | 60(2)  | 69(2)  | 42(1)  | 4(1)   | 10(1)  | 19(1)  |
| O(7)  | 45(1)  | 69(2)  | 53(2)  | 2(1)   | 11(1)  | 12(1)  |
| P(1)  | 38(1)  | 45(1)  | 43(1)  | -3(1)  | 4(1)   | 1(1)   |

**Table 20.** Hydrogen coordinates ( $\times 10^4$ ) and isotropic displacement parameters ( $\text{\AA}^2 \times 10^3$ ) for  $\text{Co}(\text{CO})_3\text{n-Bu}_4\text{N}\cdot\text{CKphos}$ .

|        | x    | y    | z    | U(eq) |
|--------|------|------|------|-------|
| H(5)   | 2065 | 614  | 1656 | 54    |
| H(6)   | 3401 | 1925 | 2555 | 53    |
| H(9A)  | 4361 | 1712 | -16  | 126   |
| H(9B)  | 5222 | 1482 | 540  | 126   |
| H(9C)  | 4650 | 2314 | 779  | 126   |
| H(10A) | 3192 | -255 | 922  | 113   |
| H(10B) | 4336 | -136 | 712  | 113   |
| H(10C) | 3536 | 62   | 85   | 113   |

|        |       |      |      |     |
|--------|-------|------|------|-----|
| H(35A) | -213  | 2071 | 4128 | 107 |
| H(35B) | 124   | 1611 | 4883 | 107 |
| H(36A) | -1285 | 776  | 4863 | 174 |
| H(36B) | -1617 | 1228 | 4104 | 174 |
| H(37A) | -1476 | 47   | 3396 | 174 |
| H(37B) | -1177 | -414 | 4160 | 174 |
| H(38A) | 30    | 41   | 2972 | 80  |
| H(38B) | 346   | -370 | 3762 | 80  |
| H(39A) | 5069  | 6827 | 3177 | 235 |
| H(39B) | 4253  | 6817 | 3843 | 235 |
| H(39C) | 4203  | 6013 | 3179 | 235 |
| H(40A) | 4836  | 5515 | 4277 | 109 |
| H(40B) | 5601  | 6401 | 4422 | 109 |
| H(41A) | 5714  | 5050 | 3168 | 105 |
| H(41B) | 6441  | 5964 | 3242 | 105 |
| H(42A) | 6332  | 4675 | 4359 | 93  |
| H(42B) | 7063  | 5581 | 4423 | 93  |
| H(43A) | 8837  | 4155 | 3998 | 101 |
| H(43B) | 8564  | 4962 | 4571 | 101 |
| H(44A) | 7308  | 3982 | 5114 | 119 |
| H(44B) | 7629  | 3179 | 4561 | 119 |
| H(45A) | 8783  | 4122 | 5812 | 132 |
| H(45B) | 9184  | 3386 | 5227 | 132 |
| H(46A) | 6629  | 3412 | 3551 | 102 |
| H(46B) | 6616  | 3941 | 2783 | 102 |
| H(47A) | 7675  | 3061 | 6342 | 185 |
| H(47B) | 8729  | 2712 | 6346 | 185 |
| H(47C) | 7919  | 2311 | 5693 | 185 |
| H(48A) | 8165  | 2979 | 3182 | 122 |
| H(48B) | 8103  | 3475 | 2396 | 122 |
| H(49A) | 6825  | 1961 | 2791 | 179 |
| H(49B) | 6643  | 2487 | 2046 | 179 |
| H(50A) | 8669  | 4900 | 2853 | 100 |
| H(50B) | 7676  | 5267 | 2619 | 100 |
| H(51A) | 8038  | 6449 | 3611 | 109 |
| H(51B) | 9069  | 6099 | 3763 | 109 |

|        |      |      |      |     |
|--------|------|------|------|-----|
| H(52A) | 7895 | 1965 | 1411 | 311 |
| H(52B) | 7257 | 1137 | 1769 | 311 |
| H(52C) | 8274 | 1573 | 2183 | 311 |
| H(53A) | 9620 | 6446 | 2570 | 159 |
| H(53B) | 8558 | 6629 | 2292 | 159 |
| H(54A) | 8711 | 7951 | 2957 | 233 |
| H(54B) | 9719 | 7889 | 2500 | 233 |
| H(54C) | 9670 | 7754 | 3418 | 233 |

---

## 7. DFT Calculations

B3LYP hybrid<sup>7</sup> and B97D empirically corrected<sup>8</sup> density functional studies were carried out in the G09 suite of electronic structure codes.<sup>9</sup> Geometries were optimized for each complex starting from the X-ray coordinates for CK/Cl (starting guess C-H distances adjusted to 1.07 Å and 1.09 Å for Csp<sup>2</sup>-H and Csp<sup>3</sup>-H distances, respectively). The LANL2 basis sets and effective core potentials were used for P and Cl, supplemented by double zeta d functions with exponents of 0.93,0.34 for P, and 1.5, 0.375 for Cl. A LANL08<sup>10</sup> basis set and effective core potentials was used for Rh, an f exponent of 1.35 was added as well. H, C, and N, and F were described with a 6-31g\* model.<sup>11</sup>

---

<sup>7</sup> Becke, A. D. *J. Chem. Phys.* **1993**, *98*, 5648-5652

<sup>8</sup> Grimme, S. *J. Comp. Chem.* **2006**, *27*, 1787-99

<sup>9</sup> Frisch, M. J.; et. al. *Gaussian 09, Revision A.1*, Gaussian, Inc.: Wallingford CT, 2009

<sup>10</sup> Hay, P. J.; Wadt, W. R. *J. Chem. Phys.* **1985**, *82*, 299-310. Roy, L. E.; Hay, P. J.; Martin, R. L. *J. Chem. Theory Comput.* **2008**, *4*, 1029-1031.

<sup>11</sup> (a) Binkley, J. S.; Pople, J. A.; Hehre, W. J. *J. Am. Chem. Soc.* **1980**, *102*, 939-947; (b) Ditchfield, R.; Hehre, W. J.; Pople, J. A. *J. Chem. Phys.* **1971**, *54*, 724-728; (c) Francl, M. M.; Pietro, W. J.; Hehre, W. J.; Binkley, J. S.; Gordon, M. S.; DeFrees, D. J.; Pople, J. A. *J. Chem. Phys.* **1982**, *77*, 3654-3665; (d) Hehre, W. J.; Ditchfield, R.; Pople, J. A. *J. Chem. Phys.* **1972**, *56*, 2257-2261.

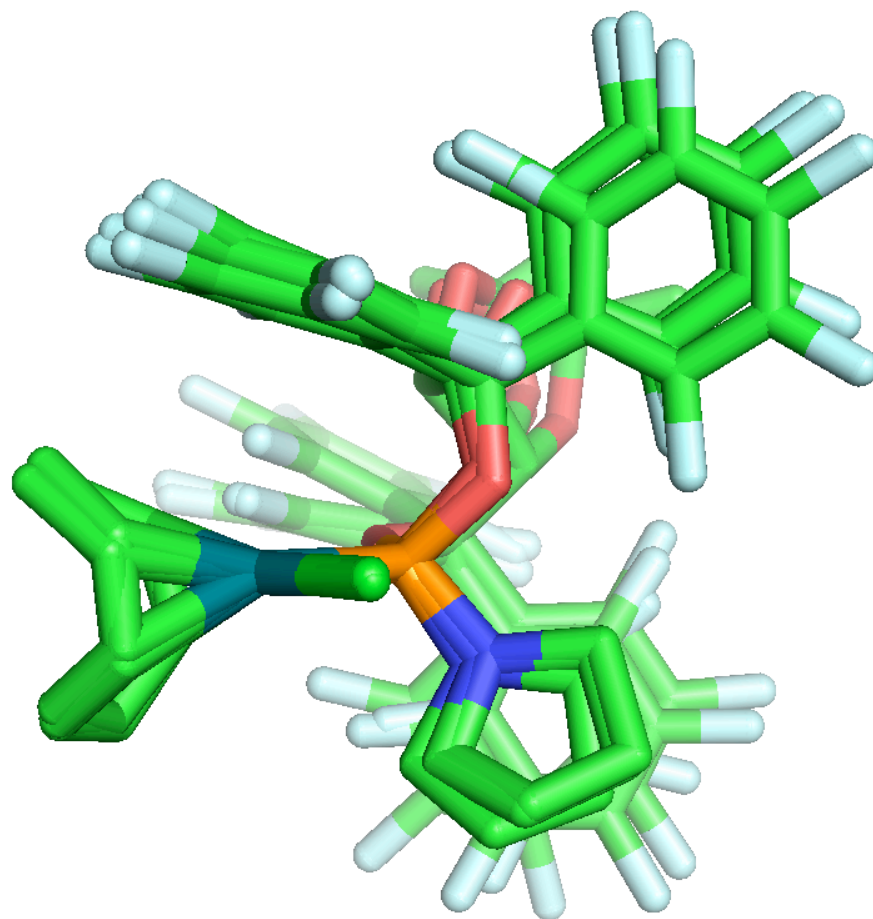

**Figure 1.** Overlay of Rh(cod)Cl/CKphos structures.

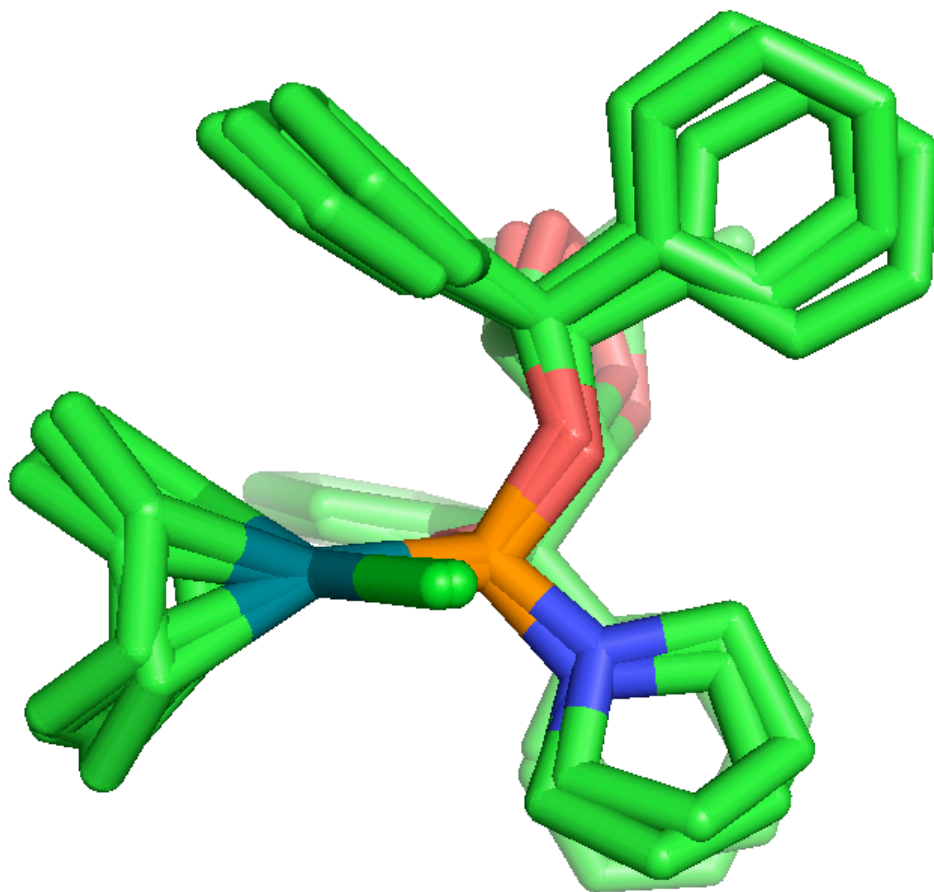

**Figure 2.** Overlay of Rh(cod)Cl/T4 structures.

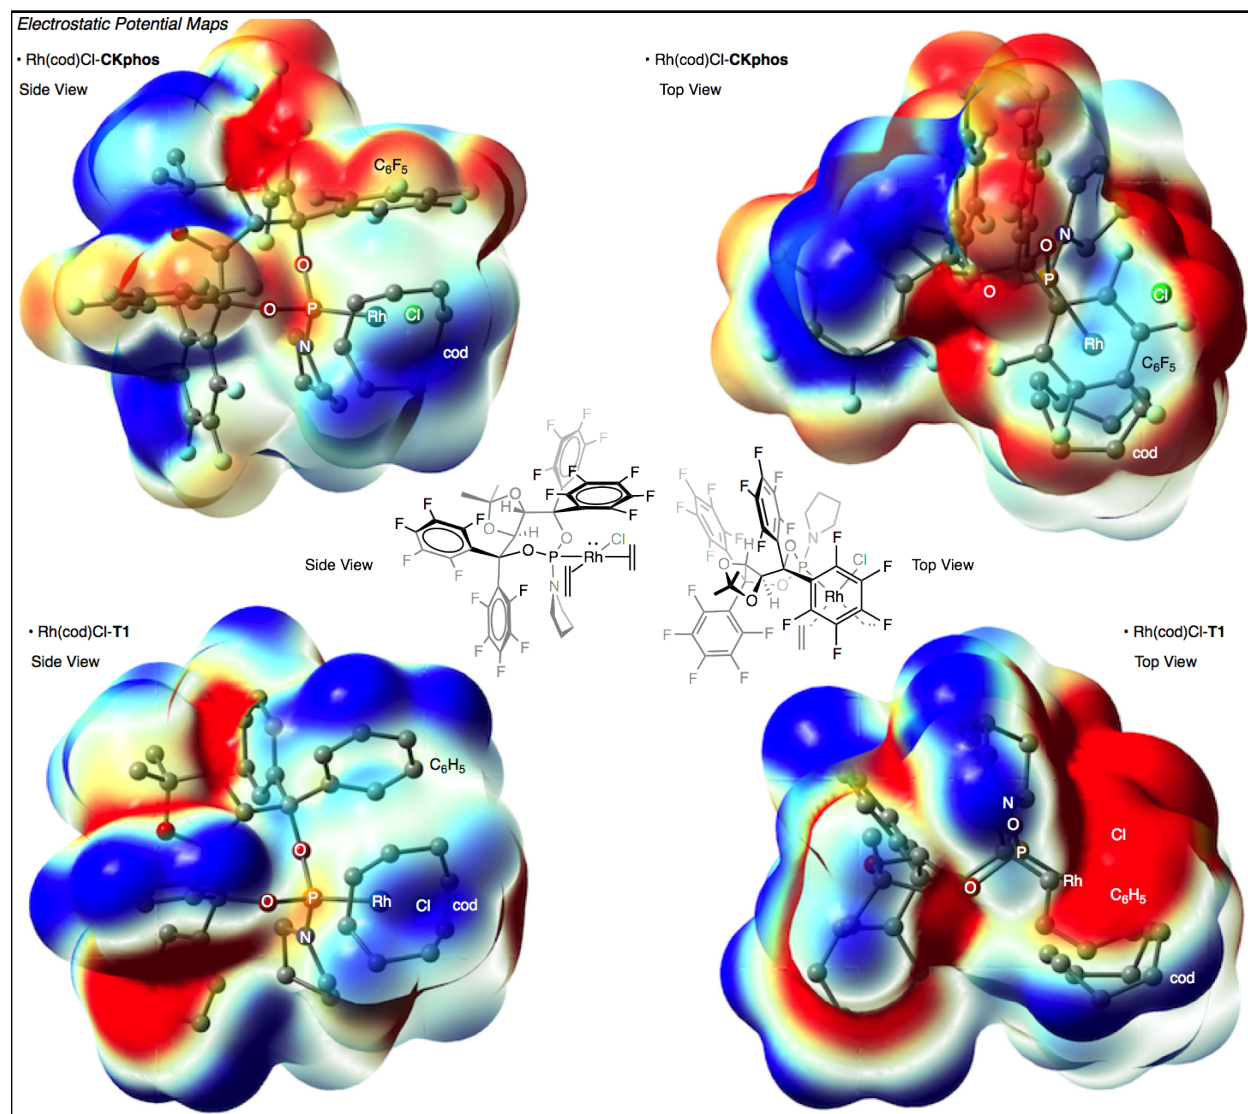

**Figure 3.** Electrostatic potential maps of Rh(cod)Cl/CKphos and Rh(cod)Cl/T4

**Table 21.** Select Computed bonded and non-bonded distances (Å).

|         | X-ray CK/Cl | B3LYP | B97D  | X-ray T4 | B3LYP | B97D  |
|---------|-------------|-------|-------|----------|-------|-------|
| Rh-P    | 2.242       | 2.331 | 2.248 | 2.255    | 2.324 | 2.247 |
| C=C     | 1.365       | 1.365 | 1.390 | 1.378    | 1.382 | 1.387 |
| Rh-Aryl | 3.728       | 3.790 | 3.492 | 4.039    | 4.257 | 4.008 |
| Cl-Aryl | 3.958       | 4.006 | 3.941 | 4.694    | 4.847 | 4.837 |

T4 B3LYP E(RB3LYP) = -2154.19845891 A.U.

| Center<br>Number | Atomic<br>Number | Atomic<br>Type | Coordinates (Angstroms) |           |           |
|------------------|------------------|----------------|-------------------------|-----------|-----------|
|                  |                  |                | X                       | Y         | Z         |
| 1                | 6                | 0              | 5.045794                | -0.709029 | 0.140118  |
| 2                | 1                | 0              | 5.336739                | -0.897483 | -0.890895 |
| 3                | 6                | 0              | 4.807421                | 0.605102  | 0.495239  |
| 4                | 1                | 0              | 4.948817                | 1.357311  | -0.277288 |
| 5                | 6                | 0              | 2.686513                | -1.721306 | 1.411558  |
| 6                | 1                | 0              | 1.757228                | -2.276254 | 1.296129  |
| 7                | 6                | 0              | 2.584396                | -0.433934 | 1.985098  |
| 8                | 1                | 0              | 1.582829                | -0.084244 | 2.225122  |
| 9                | 6                | 0              | 3.694430                | 0.255759  | 2.779176  |
| 10               | 1                | 0              | 3.236624                | 0.891212  | 3.545737  |
| 11               | 1                | 0              | 4.279995                | -0.494036 | 3.323700  |
| 12               | 6                | 0              | 4.617718                | 1.134068  | 1.901613  |
| 13               | 1                | 0              | 4.175549                | 2.131541  | 1.816657  |
| 14               | 1                | 0              | 5.594076                | 1.268373  | 2.394256  |
| 15               | 6                | 0              | 5.235246                | -1.850895 | 1.125124  |
| 16               | 1                | 0              | 5.970666                | -2.553937 | 0.716869  |
| 17               | 1                | 0              | 5.667329                | -1.467898 | 2.055215  |
| 18               | 6                | 0              | 3.919081                | -2.608556 | 1.415063  |
| 19               | 1                | 0              | 3.773446                | -3.372981 | 0.641854  |
| 20               | 1                | 0              | 3.999097                | -3.154609 | 2.369428  |
| 21               | 6                | 0              | -1.734299               | -1.410808 | 0.503108  |
| 22               | 6                | 0              | -2.442742               | -0.044209 | 0.210475  |
| 23               | 1                | 0              | -2.519655               | 0.079088  | -0.873974 |
| 24               | 6                | 0              | -1.688559               | 1.144135  | 0.824942  |
| 25               | 1                | 0              | -1.036926               | 0.802030  | 1.634772  |
| 26               | 6                | 0              | -0.802083               | 1.906523  | -0.224642 |
| 27               | 6                | 0              | -3.958440               | 1.286684  | 1.400703  |
| 28               | 6                | 0              | -4.374543               | 1.061863  | 2.851649  |
| 29               | 1                | 0              | -5.304315               | 0.485905  | 2.895005  |
| 30               | 1                | 0              | -4.534514               | 2.024315  | 3.348145  |
| 31               | 1                | 0              | -3.596024               | 0.509371  | 3.383672  |
| 32               | 6                | 0              | -4.986077               | 2.081039  | 0.598513  |
| 33               | 1                | 0              | -4.646951               | 2.203518  | -0.433215 |
| 34               | 1                | 0              | -5.125665               | 3.073199  | 1.038859  |
| 35               | 1                | 0              | -5.947587               | 1.557341  | 0.600582  |
| 36               | 6                | 0              | 0.315631                | 2.717633  | 0.440180  |
| 37               | 6                | 0              | 1.423565                | 3.114129  | -0.323265 |



|    |    |   |           |           |           |
|----|----|---|-----------|-----------|-----------|
| 38 | 6  | 0 | 2.404814  | 3.935004  | 0.231253  |
| 39 | 6  | 0 | 2.294719  | 4.375539  | 1.553249  |
| 40 | 6  | 0 | 1.197183  | 3.982347  | 2.319463  |
| 41 | 6  | 0 | 0.211943  | 3.158432  | 1.766926  |
| 42 | 6  | 0 | -1.664020 | 2.828667  | -1.107827 |
| 43 | 6  | 0 | -2.110850 | 2.426231  | -2.372022 |
| 44 | 6  | 0 | -2.917677 | 3.264568  | -3.147391 |
| 45 | 6  | 0 | -3.291403 | 4.519927  | -2.671714 |
| 46 | 6  | 0 | -2.847727 | 4.931874  | -1.412847 |
| 47 | 6  | 0 | -2.042436 | 4.096881  | -0.640697 |
| 48 | 6  | 0 | 1.289440  | -2.322988 | -2.626843 |
| 49 | 1  | 0 | 0.932213  | -3.293018 | -2.252054 |
| 50 | 1  | 0 | 2.292583  | -2.137259 | -2.233653 |
| 51 | 6  | 0 | 1.234916  | -2.274912 | -4.156764 |
| 52 | 1  | 0 | 1.913784  | -1.494519 | -4.517307 |
| 53 | 1  | 0 | 1.520660  | -3.227563 | -4.614239 |
| 54 | 6  | 0 | -0.225680 | -1.886324 | -4.425745 |
| 55 | 1  | 0 | -0.878905 | -2.758610 | -4.304353 |
| 56 | 1  | 0 | -0.390226 | -1.475417 | -5.427009 |
| 57 | 6  | 0 | -0.525409 | -0.850447 | -3.329283 |
| 58 | 1  | 0 | -0.273554 | 0.161131  | -3.665425 |
| 59 | 1  | 0 | -1.578730 | -0.869191 | -3.029517 |
| 60 | 6  | 0 | -2.160216 | -2.520456 | -0.467044 |
| 61 | 6  | 0 | -1.397033 | -3.696341 | -0.531678 |
| 62 | 6  | 0 | -1.772277 | -4.745189 | -1.367316 |
| 63 | 6  | 0 | -2.928063 | -4.643293 | -2.148789 |
| 64 | 6  | 0 | -3.704488 | -3.488471 | -2.075763 |
| 65 | 6  | 0 | -3.325567 | -2.433022 | -1.238273 |
| 66 | 6  | 0 | -1.983692 | -1.872110 | 1.950117  |
| 67 | 6  | 0 | -1.019570 | -1.712593 | 2.951887  |
| 68 | 6  | 0 | -1.275971 | -2.124796 | 4.263496  |
| 69 | 6  | 0 | -2.499677 | -2.703366 | 4.593969  |
| 70 | 6  | 0 | -3.466411 | -2.871981 | 3.599109  |
| 71 | 6  | 0 | -3.210591 | -2.463582 | 2.291915  |
| 72 | 17 | 0 | 3.235279  | 0.630037  | -2.359627 |
| 73 | 1  | 0 | 1.527846  | 2.767942  | -1.345574 |
| 74 | 1  | 0 | 3.256628  | 4.229213  | -0.375759 |
| 75 | 1  | 0 | 3.055914  | 5.023616  | 1.980179  |
| 76 | 1  | 0 | 1.096920  | 4.321783  | 3.347194  |
| 77 | 1  | 0 | -0.652666 | 2.892676  | 2.367180  |
| 78 | 1  | 0 | -1.812235 | 1.464186  | -2.764335 |
| 79 | 1  | 0 | -3.244104 | 2.932024  | -4.129416 |
| 80 | 1  | 0 | -3.914333 | 5.174201  | -3.275821 |

|    |    |   |           |           |           |
|----|----|---|-----------|-----------|-----------|
| 81 | 1  | 0 | -3.124794 | 5.910460  | -1.029587 |
| 82 | 1  | 0 | -1.703451 | 4.436304  | 0.331066  |
| 83 | 1  | 0 | -3.962400 | -1.556875 | -1.170227 |
| 84 | 1  | 0 | -4.613099 | -3.402569 | -2.665861 |
| 85 | 1  | 0 | -3.223319 | -5.462304 | -2.799083 |
| 86 | 1  | 0 | -1.165752 | -5.646271 | -1.406006 |
| 87 | 1  | 0 | -0.503614 | -3.783111 | 0.079121  |
| 88 | 1  | 0 | -3.969514 | -2.606280 | 1.531312  |
| 89 | 1  | 0 | -4.423357 | -3.327811 | 3.839476  |
| 90 | 1  | 0 | -2.698163 | -3.026663 | 5.612391  |
| 91 | 1  | 0 | -0.508884 | -1.995281 | 5.022651  |
| 92 | 1  | 0 | -0.056944 | -1.284688 | 2.706817  |
| 93 | 7  | 0 | 0.362900  | -1.243757 | -2.211946 |
| 94 | 8  | 0 | -0.298403 | -1.170734 | 0.392596  |
| 95 | 8  | 0 | -0.245104 | 0.906648  | -1.125698 |
| 96 | 8  | 0 | -3.739492 | 0.012869  | 0.777360  |
| 97 | 8  | 0 | -2.700728 | 1.975838  | 1.365456  |
| 98 | 15 | 0 | 0.599230  | -0.446159 | -0.782343 |
| 99 | 45 | 0 | 2.826405  | -0.261857 | -0.146318 |

T4 B97D: E(RB97D) = -2153.08504790 A.U.

| Center<br>Number | Atomic<br>Number | Atomic<br>Type | Coordinates (Angstroms) |           |           |
|------------------|------------------|----------------|-------------------------|-----------|-----------|
|                  |                  |                | X                       | Y         | Z         |
| 1                | 6                | 0              | 4.956396                | -0.887400 | 0.305762  |
| 2                | 1                | 0              | 5.249127                | -1.324622 | -0.651965 |
| 3                | 6                | 0              | 4.790200                | 0.487867  | 0.372315  |
| 4                | 1                | 0              | 4.988892                | 1.069276  | -0.531311 |
| 5                | 6                | 0              | 2.487499                | -1.467614 | 1.667796  |
| 6                | 1                | 0              | 1.535772                | -2.003651 | 1.660811  |
| 7                | 6                | 0              | 2.428335                | -0.069237 | 1.931855  |
| 8                | 1                | 0              | 1.434312                | 0.369948  | 2.053548  |
| 9                | 6                | 0              | 3.548296                | 0.713713  | 2.628155  |
| 10               | 1                | 0              | 3.098967                | 1.560847  | 3.168542  |
| 11               | 1                | 0              | 4.015408                | 0.062185  | 3.384816  |
| 12               | 6                | 0              | 4.634923                | 1.275267  | 1.663485  |
| 13               | 1                | 0              | 4.362327                | 2.301300  | 1.392650  |
| 14               | 1                | 0              | 5.607193                | 1.325884  | 2.190234  |
| 15               | 6                | 0              | 5.046418                | -1.768775 | 1.544429  |
| 16               | 1                | 0              | 5.766544                | -2.581756 | 1.360105  |
| 17               | 1                | 0              | 5.442616                | -1.176064 | 2.382851  |

|    |   |   |           |           |           |
|----|---|---|-----------|-----------|-----------|
| 18 | 6 | 0 | 3.675908  | -2.384410 | 1.931722  |
| 19 | 1 | 0 | 3.517337  | -3.295436 | 1.331924  |
| 20 | 1 | 0 | 3.689109  | -2.702662 | 2.993361  |
| 21 | 6 | 0 | -1.752942 | -1.267428 | 0.670186  |
| 22 | 6 | 0 | -2.385772 | 0.104504  | 0.236021  |
| 23 | 1 | 0 | -2.468931 | 0.114590  | -0.860318 |
| 24 | 6 | 0 | -1.524404 | 1.282622  | 0.724240  |
| 25 | 1 | 0 | -0.848219 | 0.970103  | 1.532355  |
| 26 | 6 | 0 | -0.634649 | 1.854152  | -0.451081 |
| 27 | 6 | 0 | -3.776660 | 1.675892  | 1.252687  |
| 28 | 6 | 0 | -4.301872 | 1.659542  | 2.688431  |
| 29 | 1 | 0 | -5.307248 | 1.212831  | 2.713043  |
| 30 | 1 | 0 | -4.357721 | 2.687296  | 3.077756  |
| 31 | 1 | 0 | -3.626544 | 1.060072  | 3.314353  |
| 32 | 6 | 0 | -4.648975 | 2.473789  | 0.279822  |
| 33 | 1 | 0 | -4.227566 | 2.420752  | -0.732726 |
| 34 | 1 | 0 | -4.684848 | 3.528359  | 0.590354  |
| 35 | 1 | 0 | -5.671152 | 2.064572  | 0.277440  |
| 36 | 6 | 0 | 0.582914  | 2.625037  | 0.061138  |
| 37 | 6 | 0 | 1.712916  | 2.753466  | -0.770435 |
| 38 | 6 | 0 | 2.792337  | 3.551866  | -0.372518 |
| 39 | 6 | 0 | 2.761244  | 4.223752  | 0.861202  |
| 40 | 6 | 0 | 1.650051  | 4.075096  | 1.705323  |
| 41 | 6 | 0 | 0.562697  | 3.279090  | 1.306642  |
| 42 | 6 | 0 | -1.499583 | 2.723042  | -1.375526 |
| 43 | 6 | 0 | -2.112380 | 2.186011  | -2.523521 |
| 44 | 6 | 0 | -2.975855 | 2.971554  | -3.304276 |
| 45 | 6 | 0 | -3.239548 | 4.302208  | -2.948080 |
| 46 | 6 | 0 | -2.625351 | 4.844783  | -1.807805 |
| 47 | 6 | 0 | -1.762891 | 4.062201  | -1.029451 |
| 48 | 6 | 0 | 1.090580  | -2.756988 | -2.355767 |
| 49 | 1 | 0 | 0.746966  | -3.632346 | -1.774605 |
| 50 | 1 | 0 | 2.141391  | -2.542637 | -2.118081 |
| 51 | 6 | 0 | 0.844479  | -2.972176 | -3.857734 |
| 52 | 1 | 0 | 1.485958  | -2.282170 | -4.427341 |
| 53 | 1 | 0 | 1.055177  | -4.005226 | -4.172549 |
| 54 | 6 | 0 | -0.639057 | -2.578829 | -4.011073 |
| 55 | 1 | 0 | -1.286703 | -3.380458 | -3.624014 |
| 56 | 1 | 0 | -0.928822 | -2.357682 | -5.049374 |
| 57 | 6 | 0 | -0.764317 | -1.336933 | -3.106322 |
| 58 | 1 | 0 | -0.514224 | -0.413234 | -3.652639 |
| 59 | 1 | 0 | -1.772752 | -1.236480 | -2.677896 |
| 60 | 6 | 0 | -2.233724 | -2.442495 | -0.184789 |

|    |    |   |           |           |           |
|----|----|---|-----------|-----------|-----------|
| 61 | 6  | 0 | -1.482150 | -3.632721 | -0.188871 |
| 62 | 6  | 0 | -1.899447 | -4.737622 | -0.939507 |
| 63 | 6  | 0 | -3.086564 | -4.672241 | -1.691168 |
| 64 | 6  | 0 | -3.851470 | -3.497320 | -1.674953 |
| 65 | 6  | 0 | -3.428958 | -2.386511 | -0.923370 |
| 66 | 6  | 0 | -2.026886 | -1.520929 | 2.159531  |
| 67 | 6  | 0 | -1.089120 | -1.177701 | 3.150388  |
| 68 | 6  | 0 | -1.396793 | -1.345572 | 4.510732  |
| 69 | 6  | 0 | -2.644509 | -1.855368 | 4.897366  |
| 70 | 6  | 0 | -3.582186 | -2.205955 | 3.911363  |
| 71 | 6  | 0 | -3.274963 | -2.041529 | 2.554857  |
| 72 | 17 | 0 | 3.307157  | -0.034999 | -2.503759 |
| 73 | 1  | 0 | 1.747592  | 2.226541  | -1.721970 |
| 74 | 1  | 0 | 3.661233  | 3.638233  | -1.027390 |
| 75 | 1  | 0 | 3.601662  | 4.851015  | 1.166758  |
| 76 | 1  | 0 | 1.619262  | 4.586755  | 2.669768  |
| 77 | 1  | 0 | -0.310629 | 3.195616  | 1.954291  |
| 78 | 1  | 0 | -1.904432 | 1.159107  | -2.814351 |
| 79 | 1  | 0 | -3.437357 | 2.539338  | -4.194876 |
| 80 | 1  | 0 | -3.910778 | 4.912716  | -3.555707 |
| 81 | 1  | 0 | -2.817047 | 5.881178  | -1.521944 |
| 82 | 1  | 0 | -1.291984 | 4.489742  | -0.145755 |
| 83 | 1  | 0 | -4.042712 | -1.485537 | -0.900477 |
| 84 | 1  | 0 | -4.780432 | -3.438915 | -2.246000 |
| 85 | 1  | 0 | -3.413491 | -5.533018 | -2.278067 |
| 86 | 1  | 0 | -1.298701 | -5.649530 | -0.940537 |
| 87 | 1  | 0 | -0.558284 | -3.675768 | 0.388121  |
| 88 | 1  | 0 | -4.006955 | -2.312084 | 1.794798  |
| 89 | 1  | 0 | -4.555823 | -2.608843 | 4.198439  |
| 90 | 1  | 0 | -2.883395 | -1.985235 | 5.955090  |
| 91 | 1  | 0 | -0.653467 | -1.078604 | 5.265204  |
| 92 | 1  | 0 | -0.111961 | -0.798765 | 2.861785  |
| 93 | 7  | 0 | 0.245766  | -1.580086 | -2.047943 |
| 94 | 8  | 0 | -0.302867 | -1.126036 | 0.540667  |
| 95 | 8  | 0 | -0.202966 | 0.724374  | -1.268392 |
| 96 | 8  | 0 | -3.666882 | 0.310775  | 0.806555  |
| 97 | 8  | 0 | -2.440881 | 2.226899  | 1.253138  |
| 98 | 15 | 0 | 0.586977  | -0.613944 | -0.754030 |
| 99 | 45 | 0 | 2.744943  | -0.392646 | -0.166655 |

**CKphos/Cl B3LYP:** E(RB3LYP) = -4138.68423078 A.U.

-----  
Center Atomic Atomic Coordinates (Angstroms)

| Number | Number | Type | X         | Y         | Z         |
|--------|--------|------|-----------|-----------|-----------|
| 1      | 6      | 0    | 3.138142  | -4.333540 | -1.008653 |
| 2      | 1      | 0    | 3.249506  | -4.286784 | -2.089635 |
| 3      | 6      | 0    | 3.944889  | -3.503100 | -0.253178 |
| 4      | 1      | 0    | 4.652744  | -2.877230 | -0.791624 |
| 5      | 6      | 0    | 0.746546  | -3.726187 | 0.450013  |
| 6      | 1      | 0    | -0.275829 | -3.358995 | 0.403084  |
| 7      | 6      | 0    | 1.608280  | -3.071726 | 1.353959  |
| 8      | 1      | 0    | 1.187880  | -2.233351 | 1.898756  |
| 9      | 6      | 0    | 2.812329  | -3.722384 | 2.038470  |
| 10     | 1      | 0    | 2.950899  | -3.252239 | 3.018078  |
| 11     | 1      | 0    | 2.588145  | -4.776453 | 2.239962  |
| 12     | 6      | 0    | 4.137818  | -3.597698 | 1.245515  |
| 13     | 1      | 0    | 4.672871  | -2.703210 | 1.575835  |
| 14     | 1      | 0    | 4.799680  | -4.444418 | 1.485734  |
| 15     | 6      | 0    | 2.359705  | -5.511055 | -0.445626 |
| 16     | 1      | 0    | 2.350917  | -6.319428 | -1.185764 |
| 17     | 1      | 0    | 2.879675  | -5.907524 | 0.432564  |
| 18     | 6      | 0    | 0.904220  | -5.138688 | -0.083338 |
| 19     | 1      | 0    | 0.281746  | -5.220223 | -0.982863 |
| 20     | 1      | 0    | 0.494835  | -5.867396 | 0.635032  |
| 21     | 6      | 0    | -2.040450 | -0.090862 | 0.328078  |
| 22     | 6      | 0    | -1.510469 | 1.374011  | 0.594175  |
| 23     | 1      | 0    | -1.462938 | 1.901331  | -0.356206 |
| 24     | 6      | 0    | -0.126832 | 1.358268  | 1.281644  |
| 25     | 1      | 0    | 0.023150  | 0.423703  | 1.817059  |
| 26     | 6      | 0    | 1.029890  | 1.556966  | 0.233876  |
| 27     | 6      | 0    | -1.541313 | 2.754401  | 2.489186  |
| 28     | 6      | 0    | -1.907439 | 2.221277  | 3.872639  |
| 29     | 1      | 0    | -2.969621 | 2.390726  | 4.075248  |
| 30     | 1      | 0    | -1.317377 | 2.732058  | 4.639653  |
| 31     | 1      | 0    | -1.703459 | 1.148731  | 3.935202  |
| 32     | 6      | 0    | -1.736151 | 4.261263  | 2.364410  |
| 33     | 1      | 0    | -1.505760 | 4.586108  | 1.346162  |
| 34     | 1      | 0    | -1.078304 | 4.786795  | 3.063541  |
| 35     | 1      | 0    | -2.773329 | 4.526675  | 2.589970  |
| 36     | 6      | 0    | 2.429401  | 1.071629  | 0.655880  |
| 37     | 6      | 0    | 3.472629  | 1.232509  | -0.270238 |
| 38     | 6      | 0    | 4.762798  | 0.769626  | -0.039635 |
| 39     | 6      | 0    | 5.050039  | 0.120415  | 1.155878  |
| 40     | 6      | 0    | 4.048761  | -0.038339 | 2.104788  |
| 41     | 6      | 0    | 2.764159  | 0.435667  | 1.855116  |

|    |    |   |           |           |           |
|----|----|---|-----------|-----------|-----------|
| 42 | 6  | 0 | 1.096842  | 3.054296  | -0.147612 |
| 43 | 6  | 0 | 0.471044  | 3.633601  | -1.257693 |
| 44 | 6  | 0 | 0.562074  | 4.997365  | -1.542869 |
| 45 | 6  | 0 | 1.280052  | 5.840963  | -0.705802 |
| 46 | 6  | 0 | 1.896944  | 5.305711  | 0.420160  |
| 47 | 6  | 0 | 1.794028  | 3.944220  | 0.685215  |
| 48 | 6  | 0 | -0.341160 | -2.163163 | -3.238947 |
| 49 | 1  | 0 | -1.342858 | -2.607923 | -3.152002 |
| 50 | 1  | 0 | 0.382327  | -2.861452 | -2.806401 |
| 51 | 6  | 0 | -0.018682 | -1.793185 | -4.688307 |
| 52 | 1  | 0 | 1.067000  | -1.706826 | -4.800665 |
| 53 | 1  | 0 | -0.392560 | -2.534744 | -5.401342 |
| 54 | 6  | 0 | -0.684350 | -0.418533 | -4.835878 |
| 55 | 1  | 0 | -1.764947 | -0.535158 | -4.986868 |
| 56 | 1  | 0 | -0.291746 | 0.166205  | -5.673279 |
| 57 | 6  | 0 | -0.404974 | 0.267969  | -3.488847 |
| 58 | 1  | 0 | 0.534539  | 0.825608  | -3.513227 |
| 59 | 1  | 0 | -1.202719 | 0.956947  | -3.201764 |
| 60 | 6  | 0 | -2.979898 | -0.239400 | -0.890263 |
| 61 | 6  | 0 | -3.267028 | -1.529046 | -1.360912 |
| 62 | 6  | 0 | -4.080339 | -1.765259 | -2.463142 |
| 63 | 6  | 0 | -4.678959 | -0.695643 | -3.122761 |
| 64 | 6  | 0 | -4.449474 | 0.595443  | -2.662726 |
| 65 | 6  | 0 | -3.620896 | 0.808604  | -1.560380 |
| 66 | 6  | 0 | -2.776931 | -0.621385 | 1.580847  |
| 67 | 6  | 0 | -2.226596 | -1.484386 | 2.537049  |
| 68 | 6  | 0 | -2.949703 | -1.939170 | 3.642502  |
| 69 | 6  | 0 | -4.257519 | -1.520563 | 3.845626  |
| 70 | 6  | 0 | -4.829601 | -0.638823 | 2.934561  |
| 71 | 6  | 0 | -4.092853 | -0.201034 | 1.839125  |
| 72 | 17 | 0 | 3.120787  | -1.349076 | -2.532842 |
| 73 | 9  | 0 | 3.245876  | 1.849786  | -1.434102 |
| 74 | 9  | 0 | 5.713764  | 0.928322  | -0.959688 |
| 75 | 9  | 0 | 6.267558  | -0.378687 | 1.381819  |
| 76 | 9  | 0 | 4.310603  | -0.689992 | 3.246882  |
| 77 | 9  | 0 | 1.865378  | 0.230485  | 2.836488  |
| 78 | 9  | 0 | -0.281437 | 2.924591  | -2.113991 |
| 79 | 9  | 0 | -0.050992 | 5.490590  | -2.623538 |
| 80 | 9  | 0 | 1.368887  | 7.144729  | -0.970762 |
| 81 | 9  | 0 | 2.580293  | 6.100481  | 1.249907  |
| 82 | 9  | 0 | 2.406636  | 3.510400  | 1.796017  |
| 83 | 9  | 0 | -3.497993 | 2.081671  | -1.157465 |
| 84 | 9  | 0 | -5.035123 | 1.634095  | -3.266205 |

|    |    |   |           |           |           |
|----|----|---|-----------|-----------|-----------|
| 85 | 9  | 0 | -5.463505 | -0.908274 | -4.179741 |
| 86 | 9  | 0 | -4.275020 | -3.015969 | -2.896040 |
| 87 | 9  | 0 | -2.739376 | -2.610110 | -0.764342 |
| 88 | 9  | 0 | -4.712648 | 0.662047  | 1.022085  |
| 89 | 9  | 0 | -6.081313 | -0.206416 | 3.116715  |
| 90 | 9  | 0 | -4.951144 | -1.948538 | 4.900604  |
| 91 | 9  | 0 | -2.372529 | -2.774170 | 4.512358  |
| 92 | 9  | 0 | -0.961011 | -1.919965 | 2.474115  |
| 93 | 7  | 0 | -0.296850 | -0.860575 | -2.523593 |
| 94 | 8  | 0 | -0.882517 | -0.925307 | 0.105867  |
| 95 | 8  | 0 | 0.663921  | 0.811684  | -0.950220 |
| 96 | 8  | 0 | -2.336064 | 2.085882  | 1.494559  |
| 97 | 8  | 0 | -0.177296 | 2.442528  | 2.185358  |
| 98 | 15 | 0 | 0.346705  | -0.801541 | -0.999944 |
| 99 | 45 | 0 | 2.019538  | -2.386673 | -0.652613 |

**CKphos/CI B97D:** E(RB97D) = -4136.65357295 A.U.

| Center<br>Number | Atomic<br>Number | Atomic<br>Type | Coordinates (Angstroms) |           |           |
|------------------|------------------|----------------|-------------------------|-----------|-----------|
|                  |                  |                | X                       | Y         | Z         |
| 1                | 6                | 0              | 3.520765                | -3.992548 | -0.562303 |
| 2                | 1                | 0              | 3.606790                | -4.049169 | -1.650094 |
| 3                | 6                | 0              | 4.269639                | -3.028025 | 0.101449  |
| 4                | 1                | 0              | 4.929404                | -2.395416 | -0.498419 |
| 5                | 6                | 0              | 1.096158                | -3.413004 | 0.885738  |
| 6                | 1                | 0              | 0.036522                | -3.156893 | 0.837581  |
| 7                | 6                | 0              | 1.914886                | -2.585392 | 1.699561  |
| 8                | 1                | 0              | 1.430415                | -1.730064 | 2.169431  |
| 9                | 6                | 0              | 3.164952                | -3.089198 | 2.433311  |
| 10               | 1                | 0              | 3.294330                | -2.496593 | 3.349555  |
| 11               | 1                | 0              | 2.985823                | -4.129666 | 2.749159  |
| 12               | 6                | 0              | 4.483903                | -3.008890 | 1.606193  |
| 13               | 1                | 0              | 5.022874                | -2.092114 | 1.866719  |
| 14               | 1                | 0              | 5.147492                | -3.846475 | 1.893453  |
| 15               | 6                | 0              | 2.851728                | -5.158694 | 0.153341  |
| 16               | 1                | 0              | 2.895345                | -6.051171 | -0.490330 |
| 17               | 1                | 0              | 3.418186                | -5.395757 | 1.066631  |
| 18               | 6                | 0              | 1.370208                | -4.862613 | 0.507863  |
| 19               | 1                | 0              | 0.744945                | -5.088913 | -0.370925 |
| 20               | 1                | 0              | 1.031306                | -5.538921 | 1.317412  |
| 21               | 6                | 0              | -2.027373               | -0.289585 | 0.323250  |
| 22               | 6                | 0              | -1.662807               | 1.252386  | 0.399313  |

|    |   |   |           |           |           |
|----|---|---|-----------|-----------|-----------|
| 23 | 1 | 0 | -1.583965 | 1.644367  | -0.615780 |
| 24 | 6 | 0 | -0.327753 | 1.435264  | 1.165619  |
| 25 | 1 | 0 | -0.100517 | 0.555687  | 1.767468  |
| 26 | 6 | 0 | 0.839591  | 1.651079  | 0.107579  |
| 27 | 6 | 0 | -1.928433 | 2.928294  | 1.995223  |
| 28 | 6 | 0 | -2.510549 | 2.787674  | 3.401764  |
| 29 | 1 | 0 | -3.583136 | 3.032443  | 3.387797  |
| 30 | 1 | 0 | -1.994683 | 3.470978  | 4.092064  |
| 31 | 1 | 0 | -2.378721 | 1.752698  | 3.748197  |
| 32 | 6 | 0 | -2.040788 | 4.343303  | 1.421562  |
| 33 | 1 | 0 | -1.653302 | 4.358301  | 0.394090  |
| 34 | 1 | 0 | -1.455799 | 5.043154  | 2.036654  |
| 35 | 1 | 0 | -3.093663 | 4.662118  | 1.414244  |
| 36 | 6 | 0 | 2.271054  | 1.296280  | 0.549965  |
| 37 | 6 | 0 | 3.287355  | 1.411727  | -0.423569 |
| 38 | 6 | 0 | 4.599865  | 0.986130  | -0.195858 |
| 39 | 6 | 0 | 4.939868  | 0.460236  | 1.055215  |
| 40 | 6 | 0 | 3.969279  | 0.373920  | 2.056998  |
| 41 | 6 | 0 | 2.656221  | 0.787258  | 1.800689  |
| 42 | 6 | 0 | 0.772784  | 3.113348  | -0.377137 |
| 43 | 6 | 0 | 0.136316  | 3.557833  | -1.551686 |
| 44 | 6 | 0 | 0.049894  | 4.920876  | -1.884309 |
| 45 | 6 | 0 | 0.596899  | 5.888708  | -1.034945 |
| 46 | 6 | 0 | 1.232269  | 5.480812  | 0.144242  |
| 47 | 6 | 0 | 1.312353  | 4.117761  | 0.454053  |
| 48 | 6 | 0 | -0.103425 | -2.542293 | -2.928710 |
| 49 | 1 | 0 | -1.032591 | -3.109340 | -2.743092 |
| 50 | 1 | 0 | 0.736664  | -3.076704 | -2.460719 |
| 51 | 6 | 0 | 0.112641  | -2.297760 | -4.429435 |
| 52 | 1 | 0 | 1.176814  | -2.076844 | -4.599080 |
| 53 | 1 | 0 | -0.186655 | -3.161525 | -5.041414 |
| 54 | 6 | 0 | -0.738917 | -1.040260 | -4.688770 |
| 55 | 1 | 0 | -1.807565 | -1.306202 | -4.737948 |
| 56 | 1 | 0 | -0.469247 | -0.514857 | -5.616546 |
| 57 | 6 | 0 | -0.461843 | -0.169870 | -3.448639 |
| 58 | 1 | 0 | 0.436148  | 0.448082  | -3.587219 |
| 59 | 1 | 0 | -1.302461 | 0.488271  | -3.193995 |
| 60 | 6 | 0 | -2.859147 | -0.733903 | -0.899138 |
| 61 | 6 | 0 | -2.985373 | -2.117466 | -1.139677 |
| 62 | 6 | 0 | -3.596066 | -2.630349 | -2.287503 |
| 63 | 6 | 0 | -4.148471 | -1.752705 | -3.229336 |
| 64 | 6 | 0 | -4.103478 | -0.375806 | -2.988961 |
| 65 | 6 | 0 | -3.480919 | 0.115150  | -1.830254 |



|    |    |   |           |           |           |
|----|----|---|-----------|-----------|-----------|
| 66 | 6  | 0 | -2.746822 | -0.690238 | 1.629758  |
| 67 | 6  | 0 | -2.123562 | -1.256566 | 2.758253  |
| 68 | 6  | 0 | -2.826880 | -1.535767 | 3.943506  |
| 69 | 6  | 0 | -4.187664 | -1.228648 | 4.043420  |
| 70 | 6  | 0 | -4.835231 | -0.641022 | 2.949528  |
| 71 | 6  | 0 | -4.115686 | -0.376013 | 1.778203  |
| 72 | 17 | 0 | 3.201273  | -1.287940 | -2.453236 |
| 73 | 9  | 0 | 3.011198  | 1.929843  | -1.631107 |
| 74 | 9  | 0 | 5.525196  | 1.073552  | -1.158359 |
| 75 | 9  | 0 | 6.186733  | 0.017307  | 1.287660  |
| 76 | 9  | 0 | 4.295875  | -0.128396 | 3.264323  |
| 77 | 9  | 0 | 1.789097  | 0.673098  | 2.831480  |
| 78 | 9  | 0 | -0.445501 | 2.715786  | -2.429050 |
| 79 | 9  | 0 | -0.558025 | 5.296811  | -3.021502 |
| 80 | 9  | 0 | 0.511500  | 7.189895  | -1.344712 |
| 81 | 9  | 0 | 1.751192  | 6.397266  | 0.978106  |
| 82 | 9  | 0 | 1.936690  | 3.800945  | 1.604942  |
| 83 | 9  | 0 | -3.512826 | 1.453460  | -1.665730 |
| 84 | 9  | 0 | -4.643852 | 0.476489  | -3.875417 |
| 85 | 9  | 0 | -4.695470 | -2.227100 | -4.358075 |
| 86 | 9  | 0 | -3.609248 | -3.955961 | -2.514005 |
| 87 | 9  | 0 | -2.457740 | -3.016250 | -0.282348 |
| 88 | 9  | 0 | -4.800089 | 0.219477  | 0.782308  |
| 89 | 9  | 0 | -6.137242 | -0.320875 | 3.033157  |
| 90 | 9  | 0 | -4.862698 | -1.490235 | 5.171197  |
| 91 | 9  | 0 | -2.190122 | -2.095718 | 4.985590  |
| 92 | 9  | 0 | -0.811801 | -1.562089 | 2.787600  |
| 93 | 7  | 0 | -0.224040 | -1.168372 | -2.368119 |
| 94 | 8  | 0 | -0.768309 | -1.013652 | 0.256829  |
| 95 | 8  | 0 | 0.546005  | 0.782281  | -1.021314 |
| 96 | 8  | 0 | -2.610584 | 1.997301  | 1.136449  |
| 97 | 8  | 0 | -0.537137 | 2.539663  | 2.021862  |
| 98 | 15 | 0 | 0.435596  | -0.857150 | -0.878393 |
| 99 | 45 | 0 | 2.243371  | -2.096171 | -0.377433 |

## 8. Structure-Function Relationships of Phosphoramidites and Product Selectivity

|                             | L/VA        | Rh-P   |
|-----------------------------|-------------|--------|
| Xypip ( <b>T2</b> )         | 0.07407     | 2.2703 |
| Xypyr [Ref 21 <b>T8</b> ]   | 0.2         | 2.2688 |
| PhNMe2 [Ref 21 <b>T1</b> ]  | 0.3125      | 2.2648 |
| Phpyr [ <b>T4</b> ]         | 0.41667     | 2.2547 |
| Guiphos [Ref 21 <b>B1</b> ] | 0.782608696 | 2.2388 |
| tBu ( <b>B1</b> )           | 0.861111111 | 2.2423 |
| CK                          | 0.95        | 2.2451 |

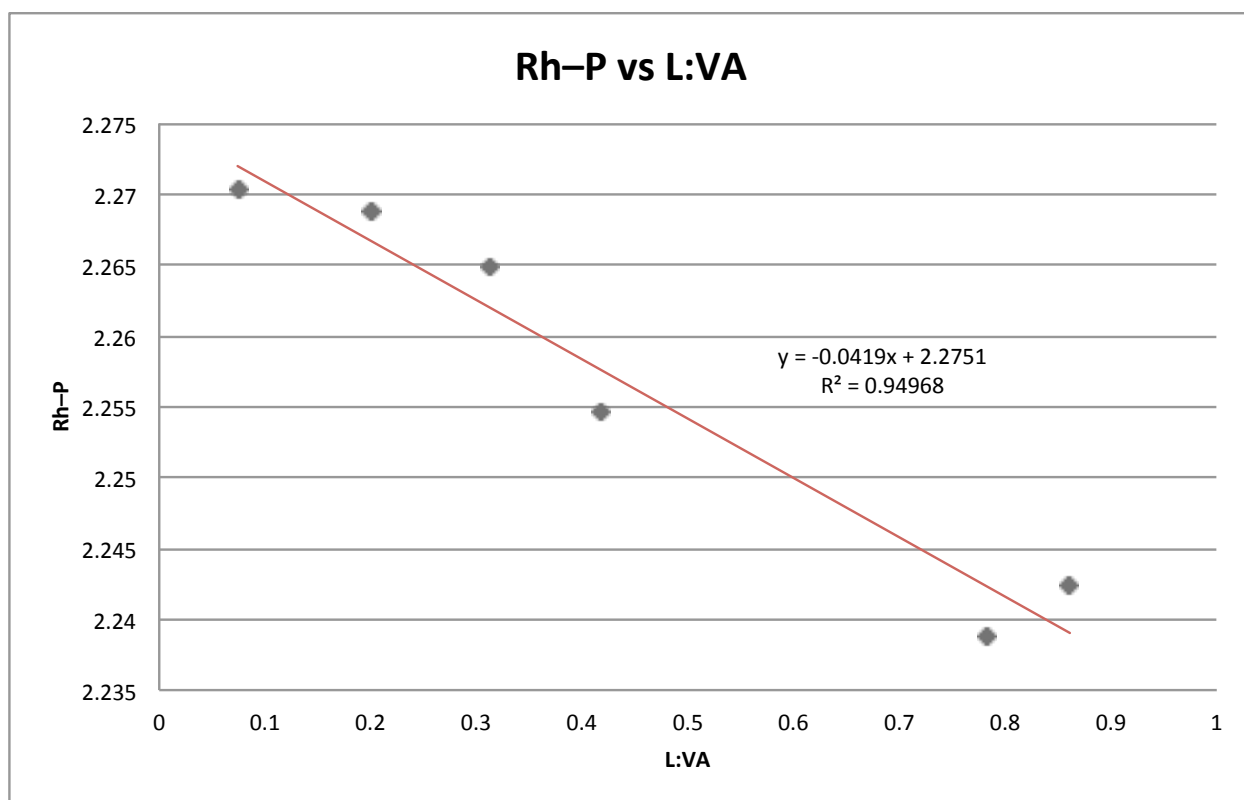

### Rh-P vs L:VA

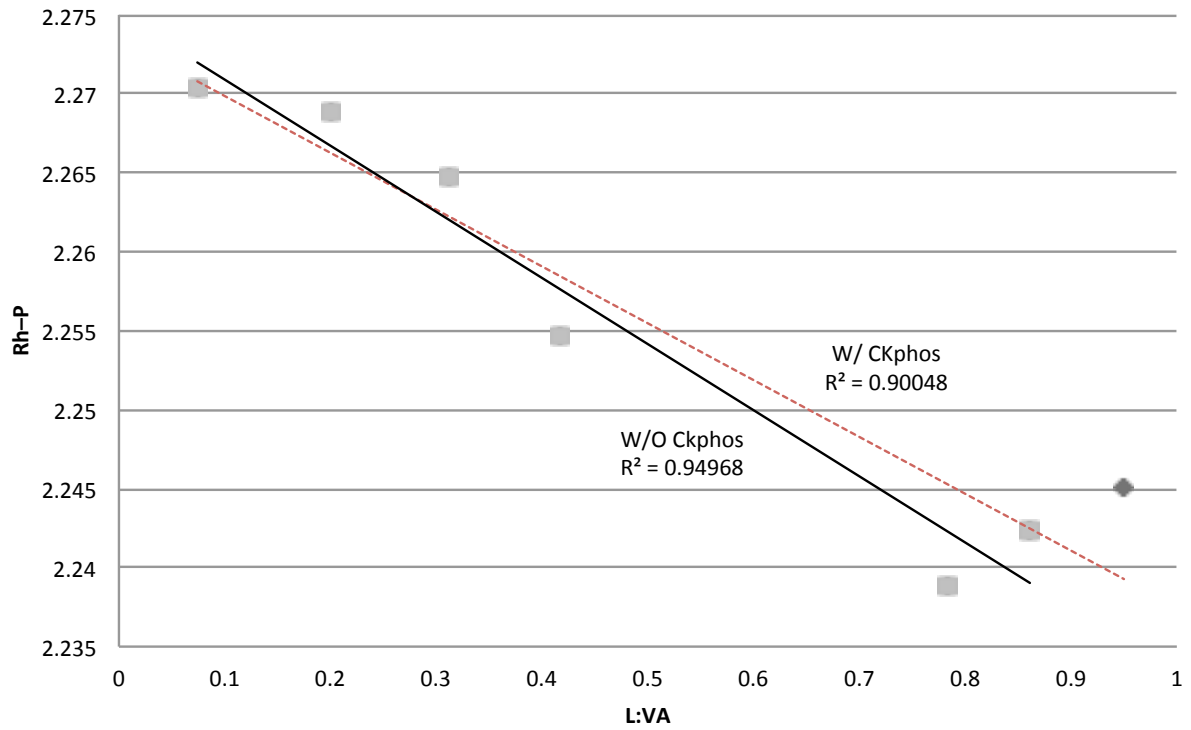

|                     | L/VA        | C=C trans to P |
|---------------------|-------------|----------------|
| Xypip (T2)          | 0.07407     | 1.409          |
| Xypyr [Ref 21 T8]   | 0.2         | 1.377          |
| PhNMe2 [Ref 21 T1]  | 0.3125      | 1.376          |
| Phpyr [T4]          | 0.41667     | 1.378          |
| Guiphos [Ref 21 B1] | 0.782608696 | 1.365          |
| tBu (B1)            | 0.861111111 | 1.369          |
| CK                  | 0.95        | 1.365          |

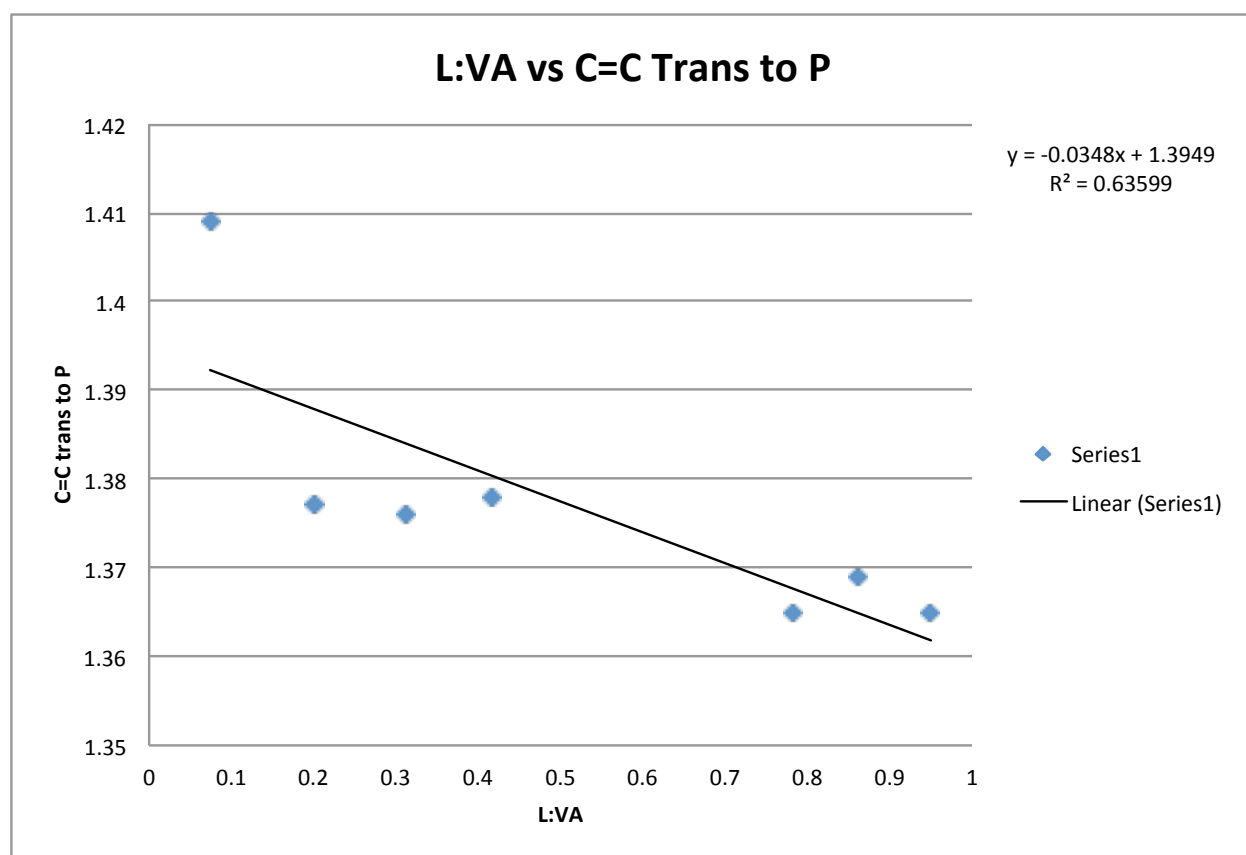

|                    | L/VA    | Rh-Centroid |
|--------------------|---------|-------------|
| Xypip (T2)         | 0.07407 | 4.025       |
| Xypyr [Ref 21 T8]  | 0.2     | 4.022       |
| PhNMe2 [Ref 21 T1] | 0.3125  | 4.059       |
| Phpyr [T4]         | 0.41667 | 4.039       |
| CK                 | 0.95    | 3.728       |

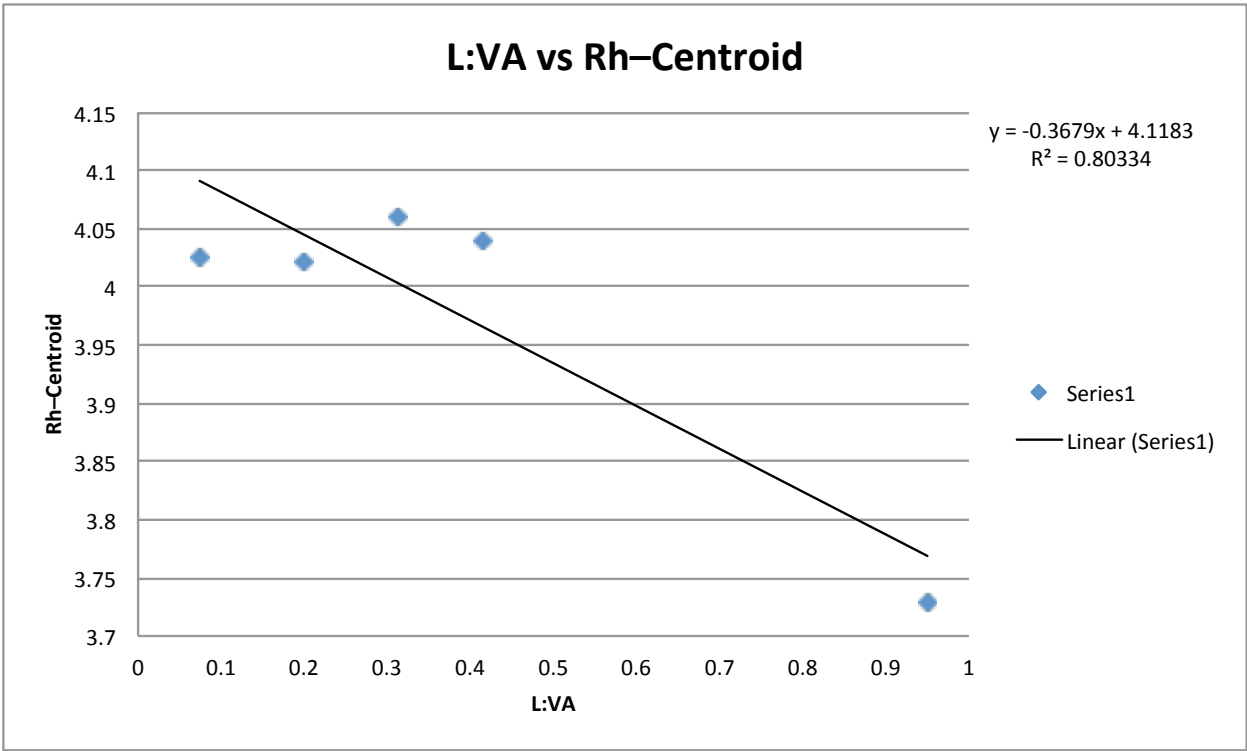

Supplement: NIHMS452257-supplement-ESI.pdf [file NIHMS452257-supplement-ESI.pdf]
